# Supplementary material for: Stereoselective synthesis of C-fused pyranoindoles, pyranobenzofurans and pyranobenzothiophene scaffolds using oxa-Pictet–Spengler type reaction of vinylogous carbonates
Source: Royal Society of Chemistry journal article supplement (doi:10.1039/c4ob01387e), 2014-01-01

**Stereoselective synthesis of C-fused pyranoindoles,  
pyranobenzofurans and pyranobenzothiophene scaffolds using  
*oxa*-Pictet Spengler type reaction of vinylogous carbonates**

**Santosh J. Gharpure\* and V. Prasath**

E-mail: [sjgharpure@iitb.ac.in](mailto:sjgharpure@iitb.ac.in)

Department of Chemistry, Indian Institute of Technology Bombay, Powai, Mumbai –  
400076

## Crystal data and structure refinement for 1a

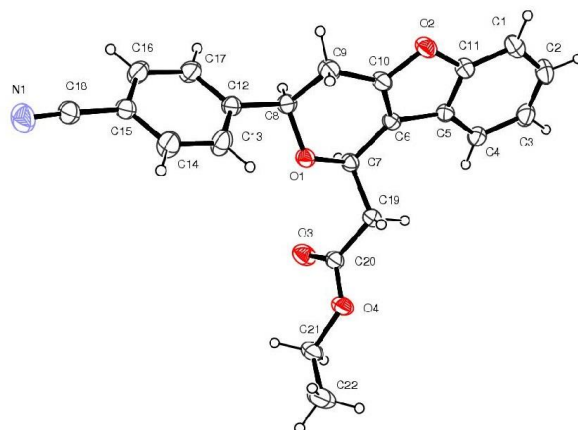

|                                   |                                                                                                                             |
|-----------------------------------|-----------------------------------------------------------------------------------------------------------------------------|
| Identification code               | <b>1a</b>                                                                                                                   |
| Solvent                           | CH <sub>3</sub> CN                                                                                                          |
| CCDC                              | 971411                                                                                                                      |
| Empirical formula                 | C <sub>22</sub> H <sub>19</sub> NO <sub>4</sub>                                                                             |
| Formula weight                    | 361.38                                                                                                                      |
| Temperature                       | 298(2) K                                                                                                                    |
| Wavelength                        | 0.71073 Å                                                                                                                   |
| Crystal system, space group       | Triclinic, P-1                                                                                                              |
| Unit cell dimensions              | a = 8.2827(3) Å alpha = 98.787(2) deg.<br>b = 8.3250(3) Å beta = 93.426(2) deg.<br>c = 15.0662(7) Å gamma = 114.758(2) deg. |
| Volume                            | 923.40(6) Å <sup>3</sup>                                                                                                    |
| Z, Calculated density             | 2, 1.300 Mg/m <sup>3</sup>                                                                                                  |
| Absorption coefficient            | 0.090 mm <sup>-1</sup>                                                                                                      |
| F(000)                            | 380                                                                                                                         |
| Crystal size                      | 0.45 x 0.35 x 0.20 mm                                                                                                       |
| Theta range for data collection   | 1.38 to 28.59 deg.                                                                                                          |
| Limiting indices                  | -9 ≤ h ≤ 11, -11 ≤ k ≤ 7, -20 ≤ l ≤ 19                                                                                      |
| Reflections collected / unique    | 12745 / 4594 [R(int) = 0.0203]                                                                                              |
| Completeness to theta = 25.00     | 99.7 %                                                                                                                      |
| Absorption correction             | Multi-scan                                                                                                                  |
| Max. and min. transmission        | 0.9823 and 0.9607                                                                                                           |
| Refinement method                 | Full-matrix least-squares on F <sup>2</sup>                                                                                 |
| Data / restraints / parameters    | 4594 / 0 / 245                                                                                                              |
| Goodness-of-fit on F <sup>2</sup> | 0.983                                                                                                                       |
| Final R indices [I > 2σ(I)]       | R1 = 0.0439, wR2 = 0.1041                                                                                                   |
| R indices (all data)              | R1 = 0.0546, wR2 = 0.1119                                                                                                   |
| Largest diff. peak and hole       | 0.246 and -0.211 e.Å <sup>-3</sup>                                                                                          |

## Crystal data and structure refinement for 1f

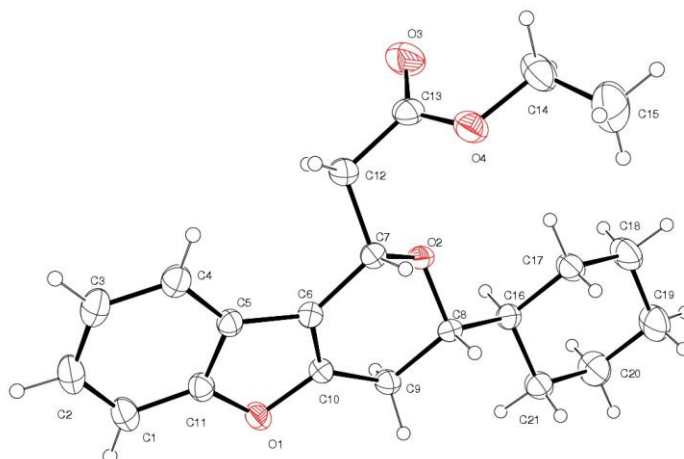

|                                   |                                                                                                                     |
|-----------------------------------|---------------------------------------------------------------------------------------------------------------------|
| Identification code               | <b>1f</b>                                                                                                           |
| Solvent                           | CH <sub>3</sub> CN                                                                                                  |
| CCDC                              | 971412                                                                                                              |
| Empirical formula                 | C <sub>29</sub> H <sub>26</sub> N <sub>2</sub> O <sub>5</sub> S                                                     |
| Formula weight                    | 514.58                                                                                                              |
| Temperature                       | 298(2) K                                                                                                            |
| Wavelength                        | 0.71073 Å                                                                                                           |
| Crystal system, space group       | Triclinic, P-1                                                                                                      |
| Unit cell dimensions              | a = 8.1294(4) Å alpha = 87.310(2) deg.<br>b = 8.2212(4) Å beta = 87.214(2) deg.<br>c = 17.8893(6) Å gamma = 90 deg. |
| Volume                            | 1295.19(11) Å <sup>3</sup>                                                                                          |
| Z, Calculated density             | 2, 1.319 Mg/m <sup>3</sup>                                                                                          |
| Absorption coefficient            | 0.167 mm <sup>-1</sup>                                                                                              |
| F (000)                           | 540                                                                                                                 |
| Crystal size                      | 0.45 x 0.35 x 0.12 mm                                                                                               |
| Theta range for data collection   | 2.08 to 28.24 deg.                                                                                                  |
| Limiting indices                  | -10 ≤ h ≤ 10, -10 ≤ k ≤ 9, -26 ≤ l ≤ 26                                                                             |
| Completeness to theta = 25.00     | 98.3 %                                                                                                              |
| Max. and min. transmission        | 0.9802 and 0.9285                                                                                                   |
| Refinement method                 | Full-matrix least-squares on F <sup>2</sup>                                                                         |
| Data / restraints / parameters    | 6020 / 0 / 336                                                                                                      |
| Goodness-of-fit on F <sup>2</sup> | 1.034                                                                                                               |
| Final R indices [I > 2σ(I)]       | R1 = 0.0423, wR2 = 0.1057                                                                                           |
| R indices (all data)              | R1 = 0.0641, wR2 = 0.1182                                                                                           |
| Largest diff. peak and hole       | 0.297 and -0.252 e.Å <sup>-3</sup>                                                                                  |

## Crystal data and structure refinement for **1k**

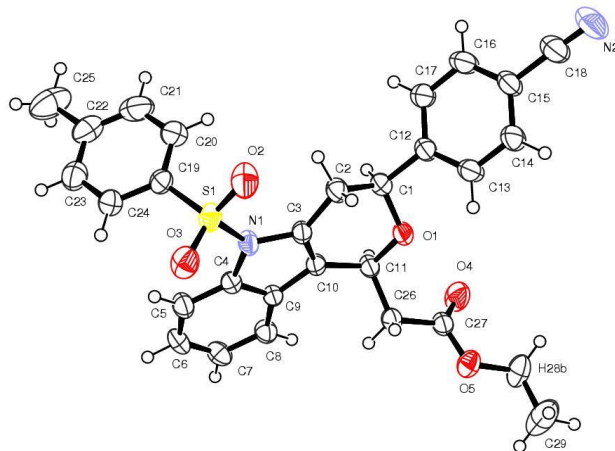

|                                   |                                                                                                                         |
|-----------------------------------|-------------------------------------------------------------------------------------------------------------------------|
| Identification code               | <b>1k</b>                                                                                                               |
| Solvent                           | CH <sub>3</sub> CN                                                                                                      |
| CCDC                              | 971413                                                                                                                  |
| empirical formula                 | C <sub>29</sub> H <sub>26</sub> N <sub>2</sub> O <sub>5</sub> S                                                         |
| Formula weight                    | 514.58                                                                                                                  |
| Temperature                       | 298(2) K                                                                                                                |
| Wavelength                        | 0.71073 Å                                                                                                               |
| Crystal system, space group       | Triclinic, P-1                                                                                                          |
| Unit cell dimensions              | a = 8.1294(4) Å alpha = 87.310(2) deg.<br>b = 8.2212(4) Å beta = 87.214(2) deg.<br>c = 19.5982(10) Å gamma = 82.233 (2) |
| deg.                              |                                                                                                                         |
| Z, Calculated density             | 2,1.319 Mg/m <sup>3</sup>                                                                                               |
| F(000)                            | 540                                                                                                                     |
| Crystal size                      | 0.45 x 0.35 x 0.12 mm                                                                                                   |
| Limiting indices                  | -10 ≤ h ≤ 10, -10 ≤ k ≤ 9, -26 ≤ l ≤ 26                                                                                 |
| Reflections collected / unique    | 16654 / 6020 [R(int) = 0.0220]                                                                                          |
| Completeness to theta = 25.00     | 98.3 %                                                                                                                  |
| Absorption correction             | Multi-scan                                                                                                              |
| Max. and min. transmission        | 0.9802 and 0.9285                                                                                                       |
| Refinement method                 | Full-matrix least-squares on F <sup>2</sup>                                                                             |
| Data / restraints / parameters    | 6020 / 0 / 336                                                                                                          |
| Goodness-of-fit on F <sup>2</sup> | 1.034                                                                                                                   |
| Final R indices [I > 2sigma(I)]   | R1 = 0.0423, wR2 = 0.1057                                                                                               |
| R indices (all data)              | R1 = 0.0641, wR2 = 0.1182                                                                                               |
| Largest diff. peak and hole       | 0.297 and -0.252 e.Å                                                                                                    |

## Crystal data and structure refinement for 14

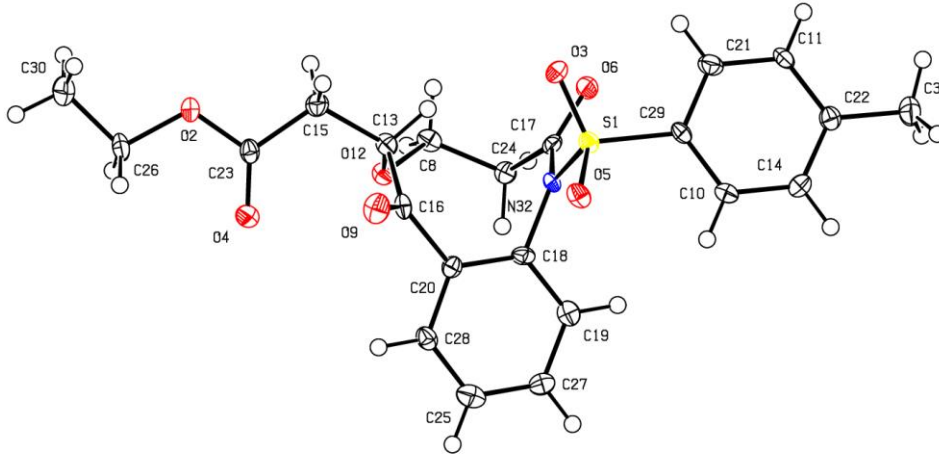

|                     |                                      |                                                                            |
|---------------------|--------------------------------------|----------------------------------------------------------------------------|
| Identification code | <b>14</b>                            |                                                                            |
| Solvent             | CH <sub>3</sub> CN                   |                                                                            |
| CCDC                | 971414                               |                                                                            |
| Bond precision:     | C-C = 0.0067 Å                       | Wavelength = 0.71075                                                       |
| Cell:               | a = 7.440 (5)<br>Alpha = 83.084 (17) | b = 10.513 (7) c = 13.472 (9)<br>beta = 86.07 (2)      gamma = 86.796 (18) |
| Temperature:        | 100 K                                |                                                                            |

|                                 | Calculated                                        | Reported                                          |  |
|---------------------------------|---------------------------------------------------|---------------------------------------------------|--|
| Volume                          | 1042.4(12)                                        | 1042.4 (12)                                       |  |
| Space group                     | P -1                                              | P -1                                              |  |
| Hall group                      | -P 1                                              | -P 1                                              |  |
| Moiety formula                  | C <sub>22</sub> H <sub>23</sub> NO <sub>7</sub> S | C <sub>22</sub> H <sub>23</sub> NO <sub>7</sub> S |  |
| Sum formula                     | C <sub>22</sub> H <sub>23</sub> NO <sub>7</sub> S | C <sub>22</sub> H <sub>23</sub> NO <sub>7</sub> S |  |
| Mr                              | 445.48                                            | 445.49                                            |  |
| Dx, g cm <sup>-3</sup>          | 1.419                                             | 1.419                                             |  |
| Z                               | 2                                                 | 2                                                 |  |
| Mu (mm <sup>-1</sup> )          | 0.201                                             | 0.201                                             |  |
| F000                            | 468.0                                             | 468.0                                             |  |
| F000'                           | 468.50                                            |                                                   |  |
| h, k, lmax                      | 8,12,15                                           | 8,12,15                                           |  |
| Nref                            | 3661                                              | 3594                                              |  |
| Tmin, Tmax                      | 0.961, 0.961                                      | 0.930, 0.961                                      |  |
| Tmin' 0.961                     |                                                   |                                                   |  |
| Correction method = NUMERICAL   |                                                   |                                                   |  |
| Data completeness = 0.982       |                                                   | Theta (max) = 25.000                              |  |
| R (reflections) = 0.0769 (2680) |                                                   | wR2(reflections) = 0.1773( 3588)                  |  |
| S = 1.239                       |                                                   | Npar= 280                                         |  |

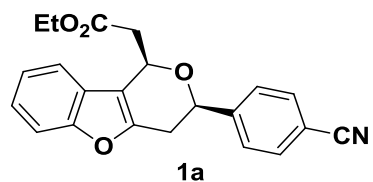

<sup>1</sup>H NMR in CDCl<sub>3</sub>

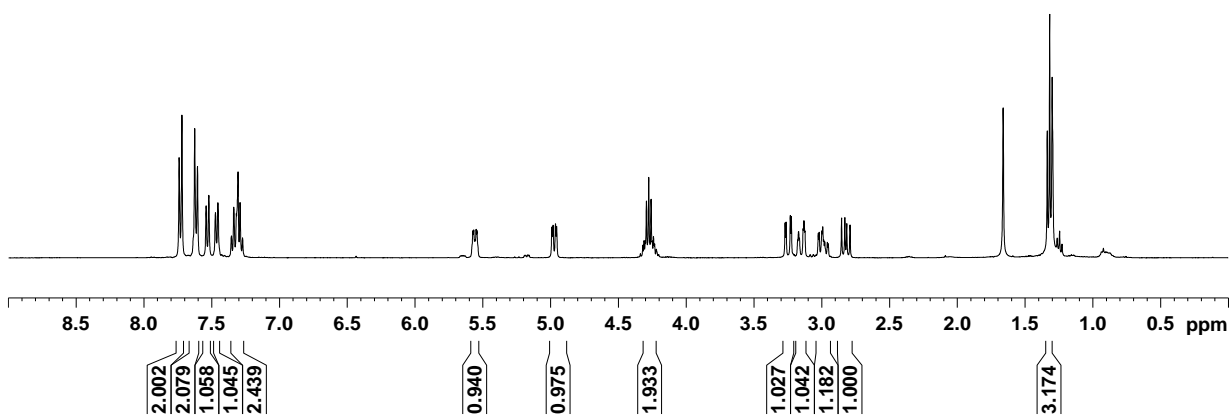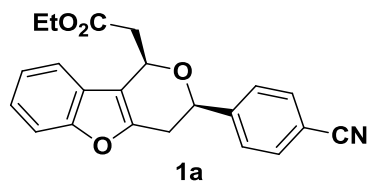

<sup>13</sup>C NMR in CDCl<sub>3</sub>

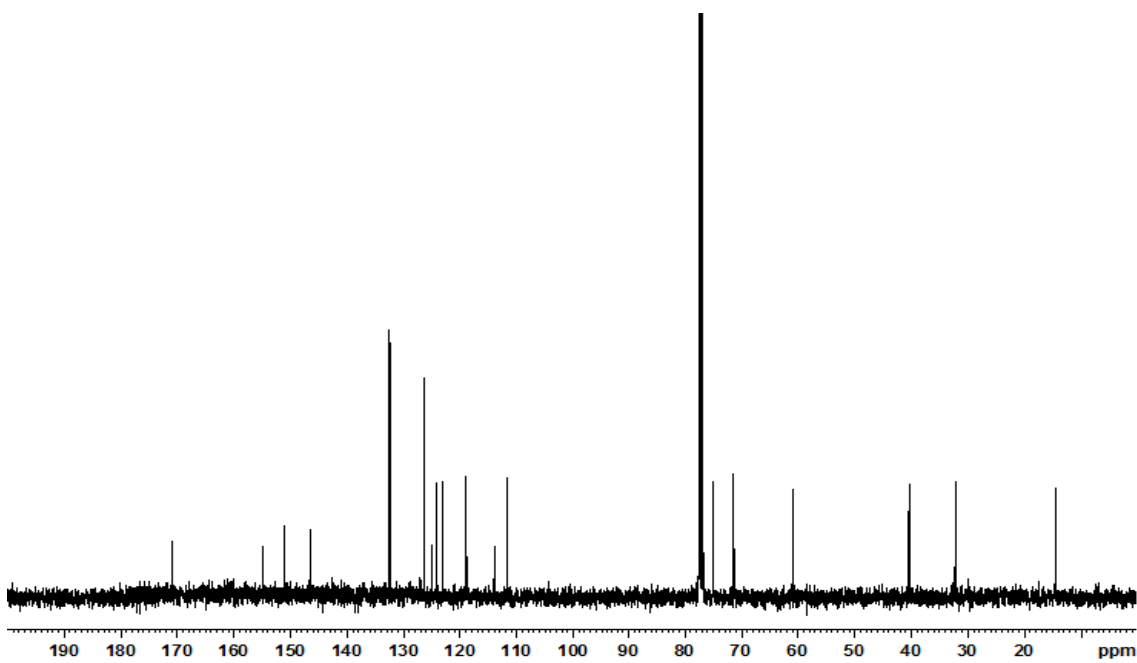

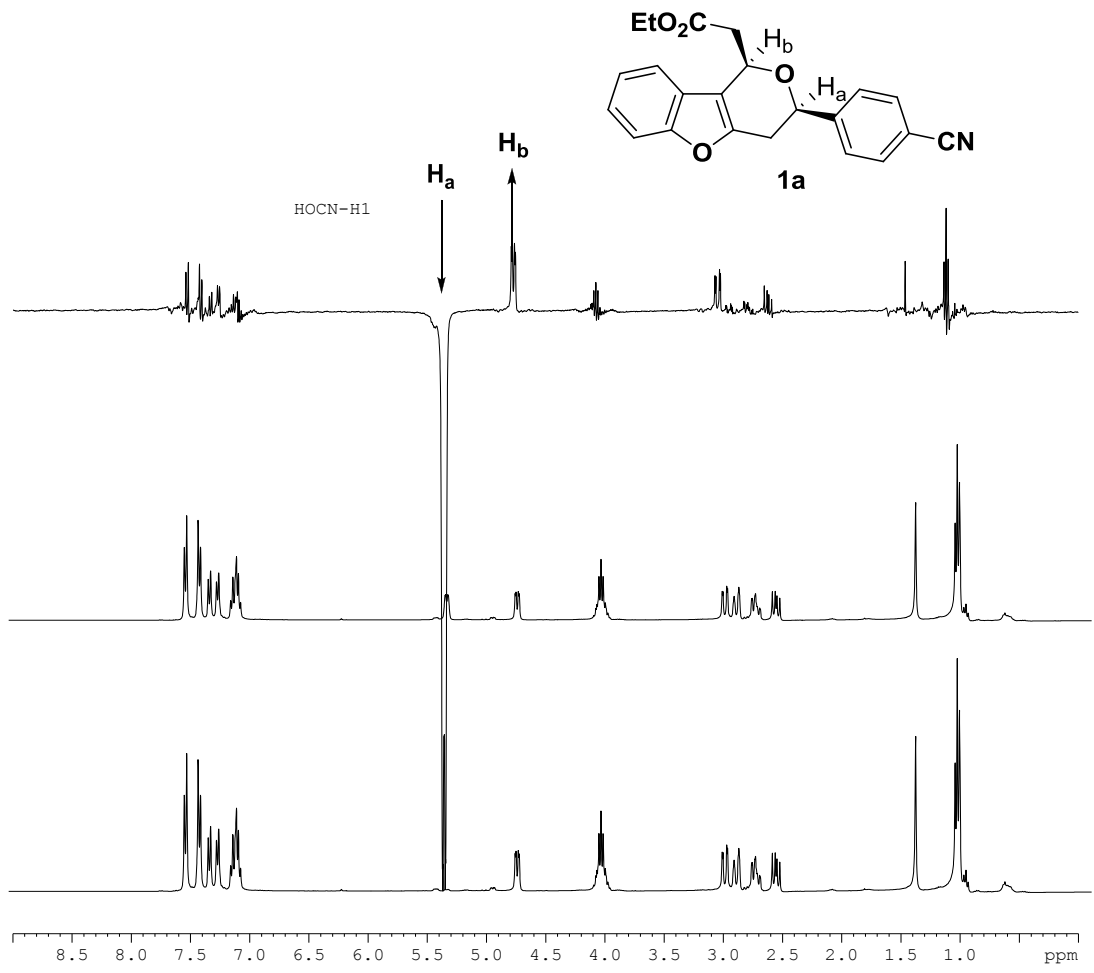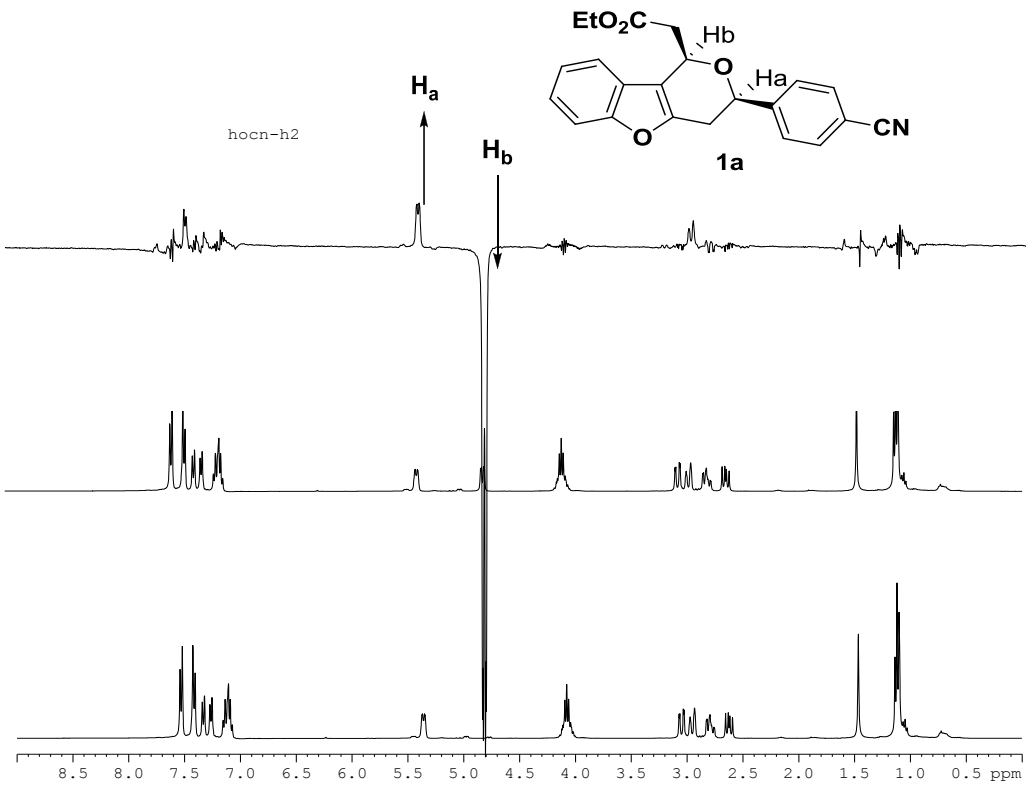

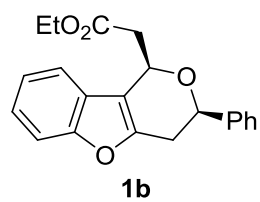

<sup>1</sup>H NMR in CDCl<sub>3</sub>

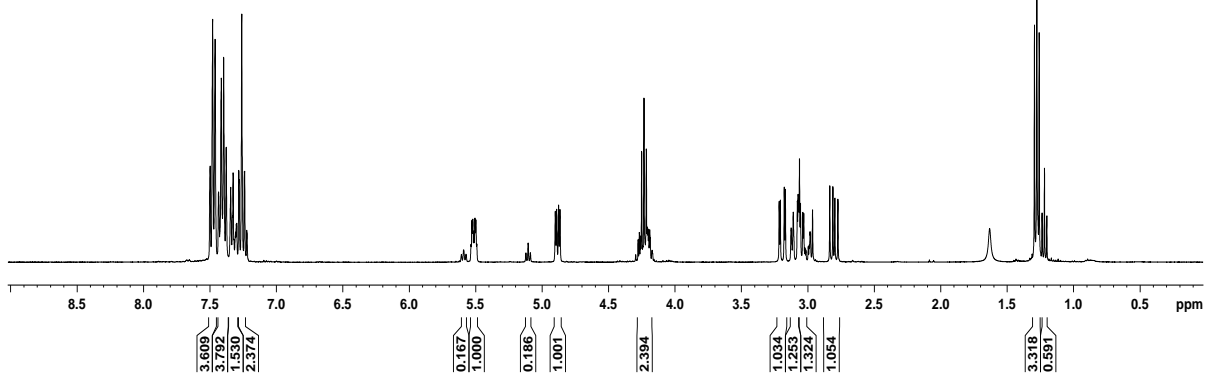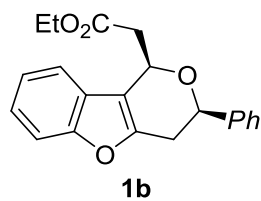

<sup>13</sup>C NMR in CDCl<sub>3</sub>

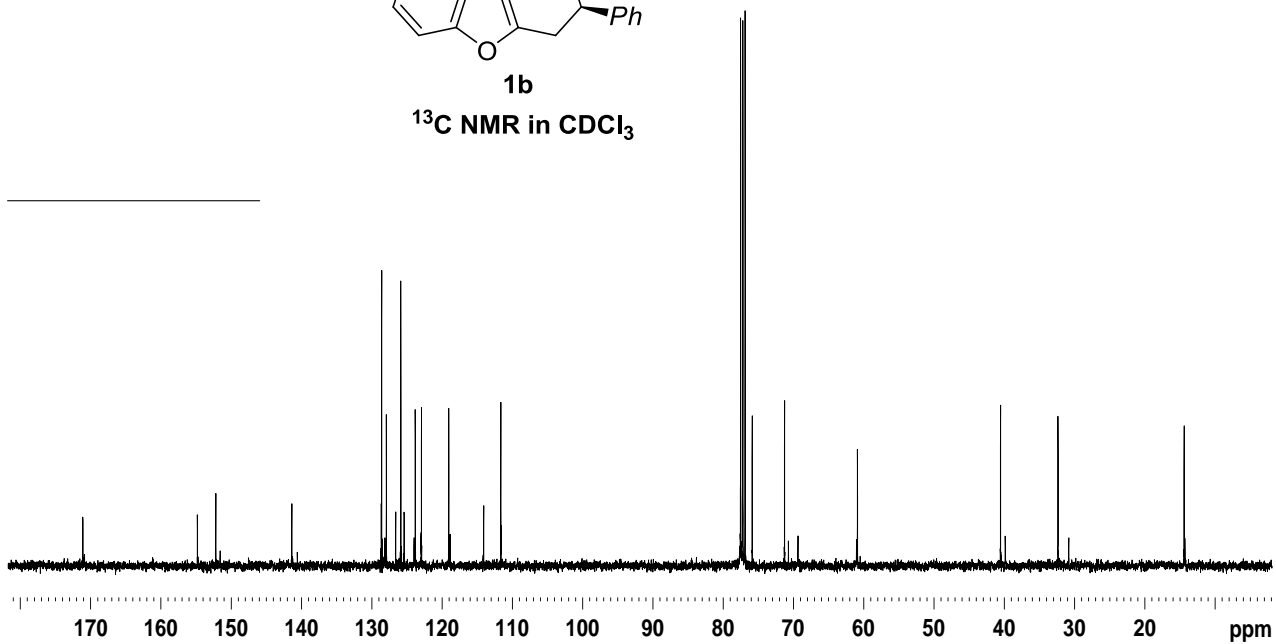



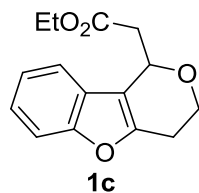

<sup>1</sup>H NMR in CDCl<sub>3</sub>

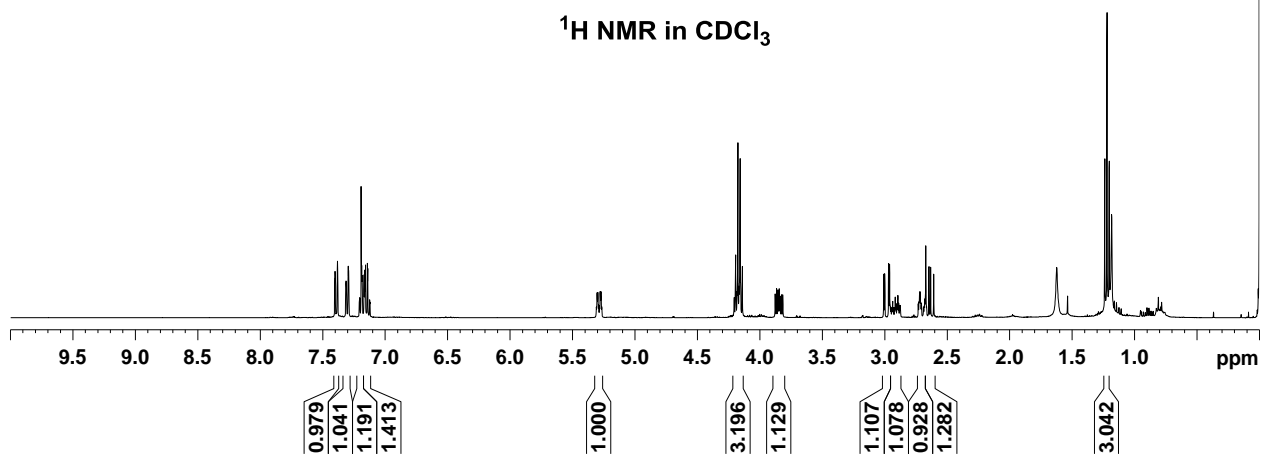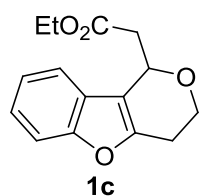

<sup>13</sup>C NMR in CDCl<sub>3</sub>

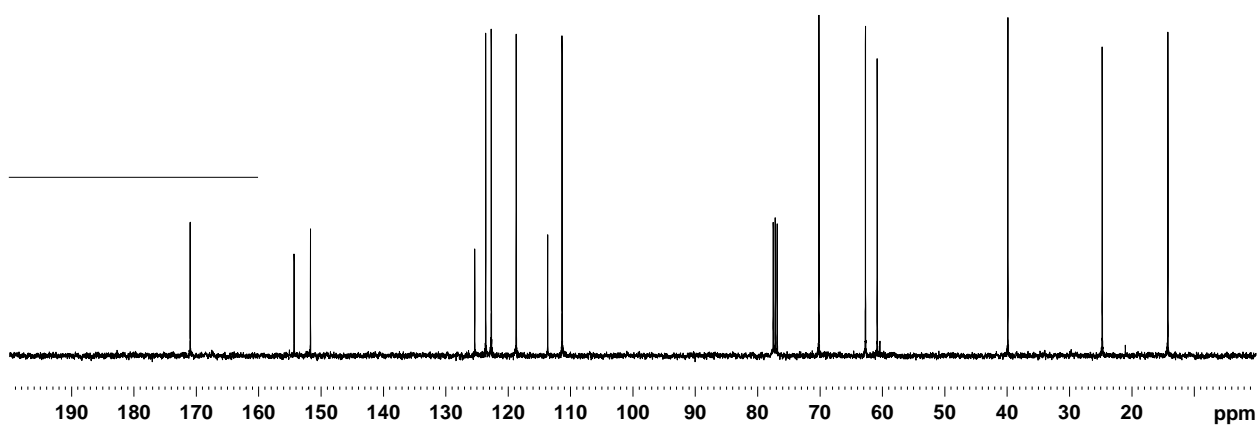

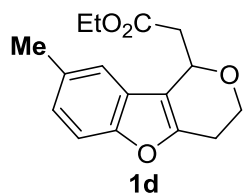

<sup>1</sup>H NMR in CDCl<sub>3</sub>

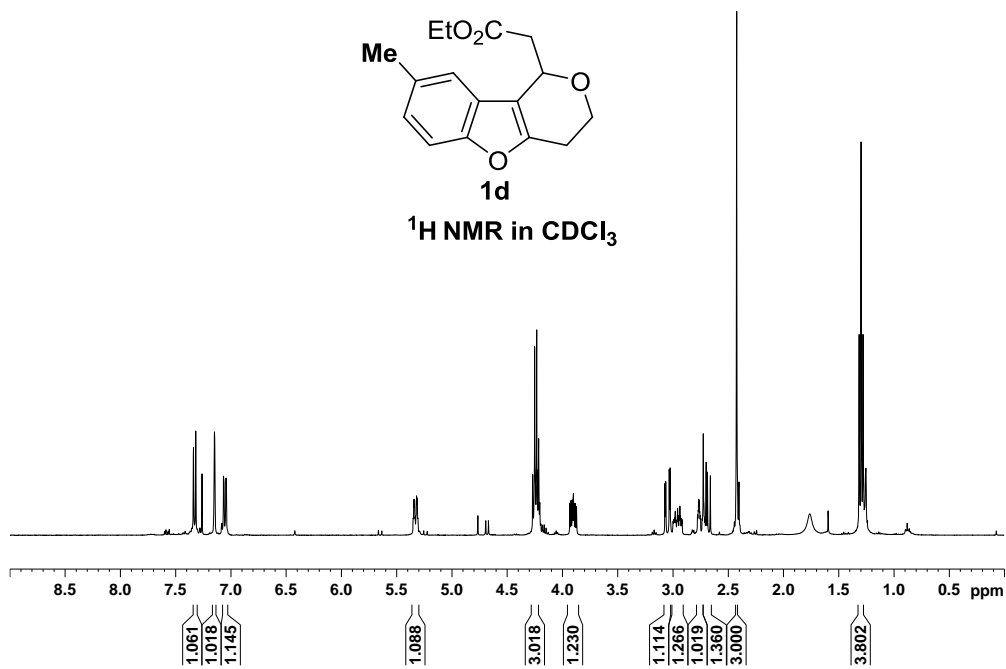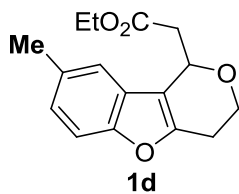

<sup>13</sup>C NMR in CDCl<sub>3</sub>

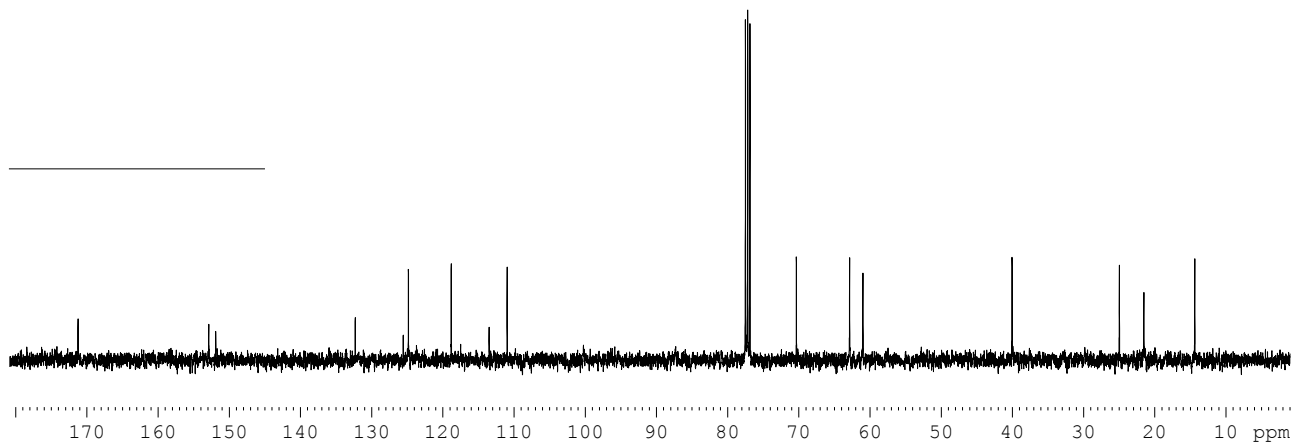

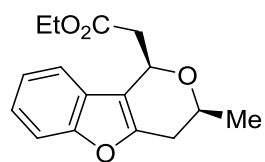

**1e**

<sup>1</sup>H NMR in CDCl<sub>3</sub>

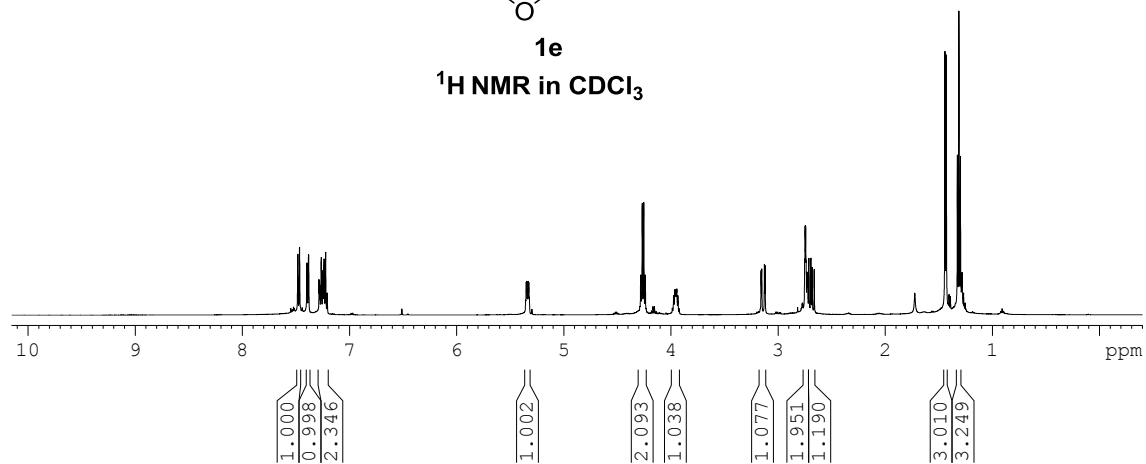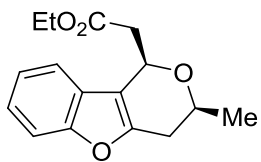

**1e**

<sup>13</sup>C NMR in CDCl<sub>3</sub>

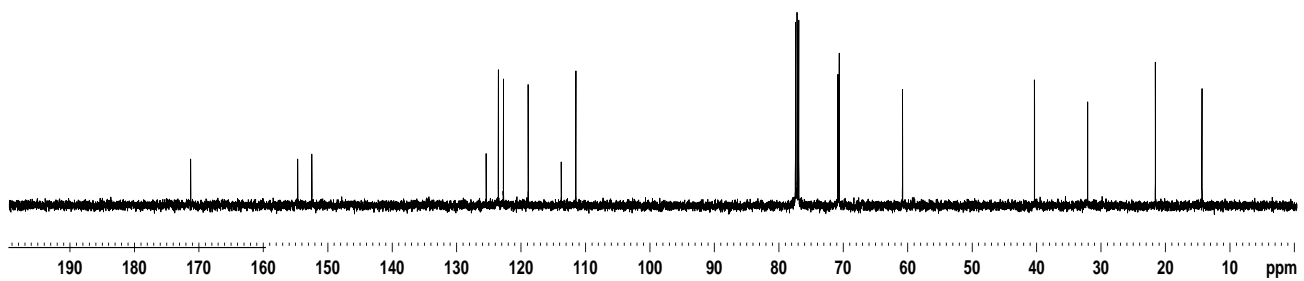

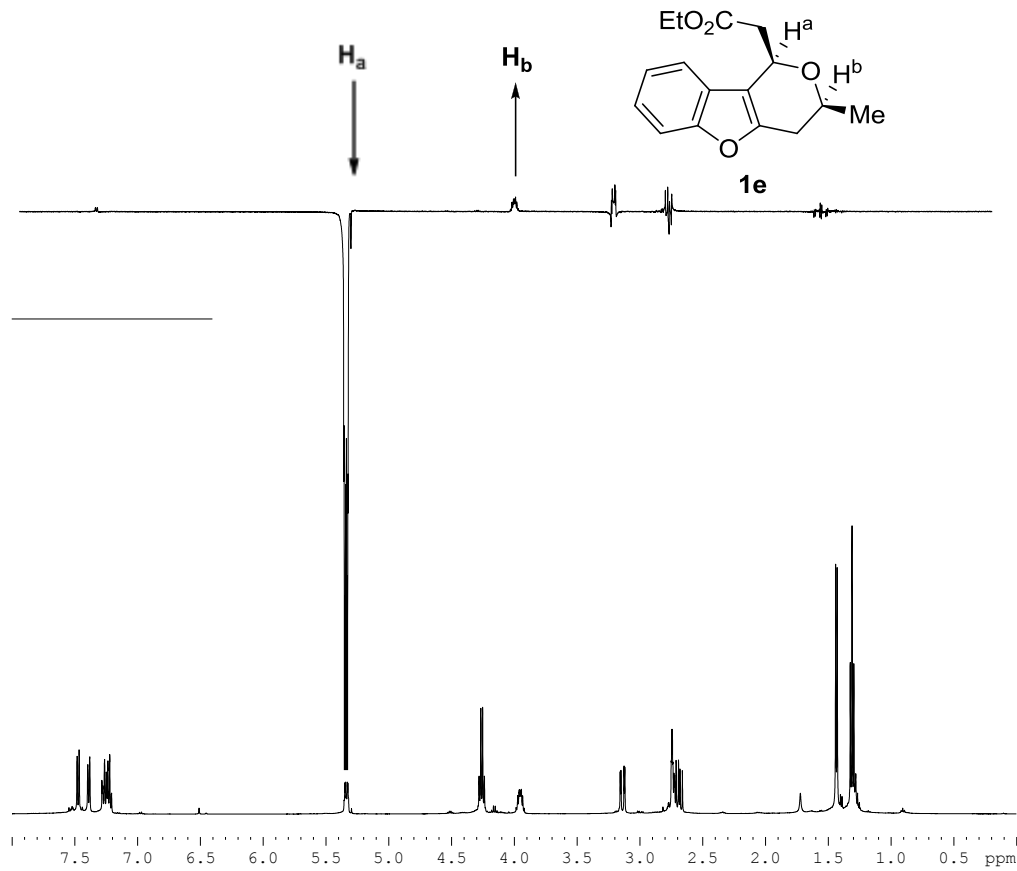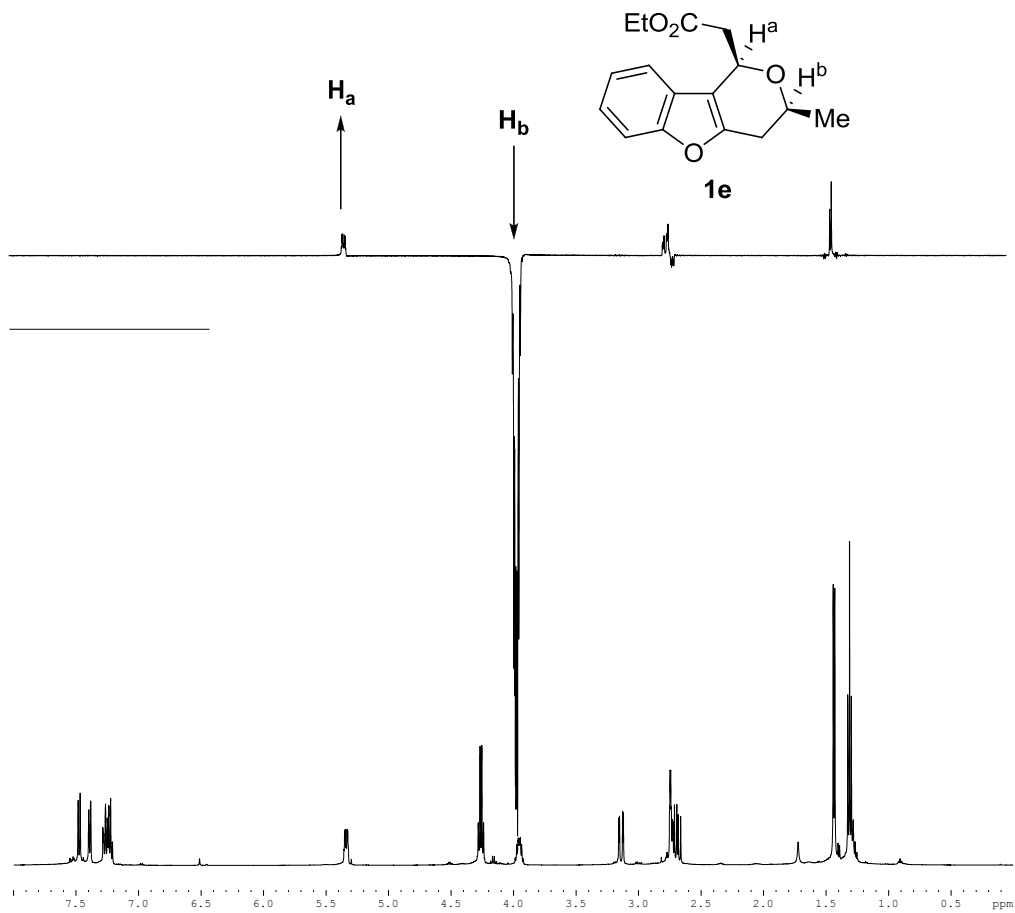

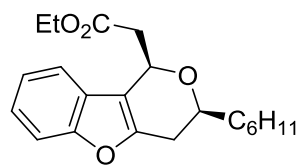

1f

<sup>1</sup>H NMR in CDCl<sub>3</sub>

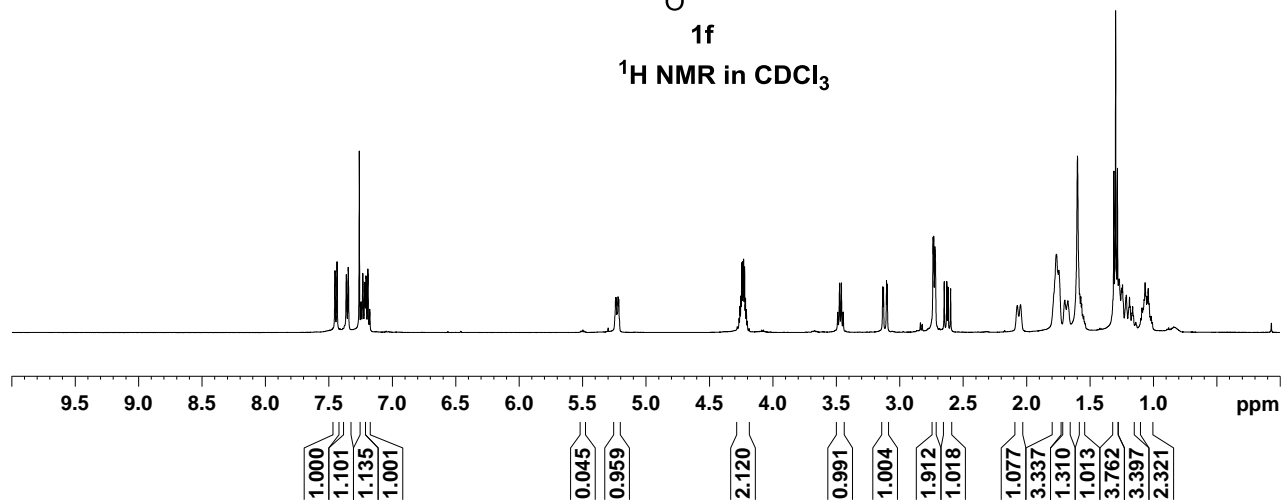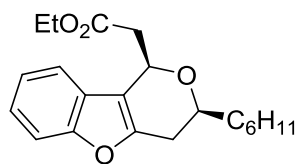

1f

<sup>13</sup>C NMR in CDCl<sub>3</sub>

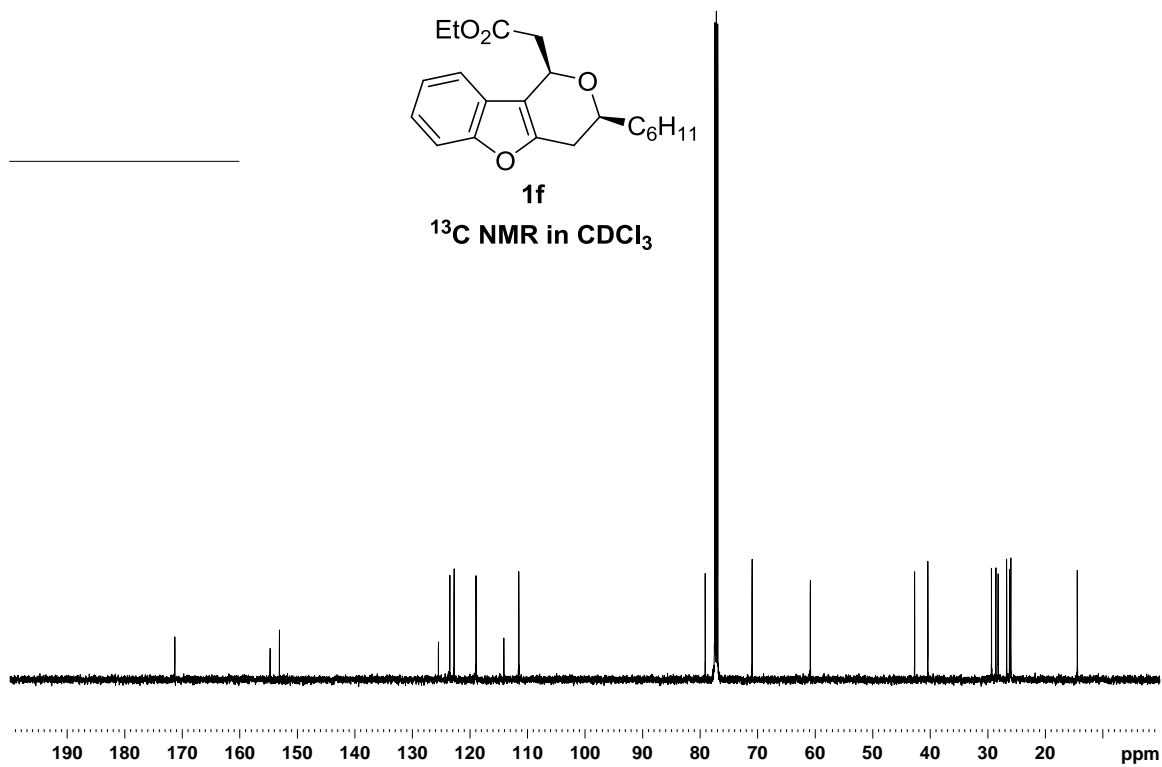

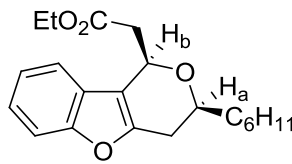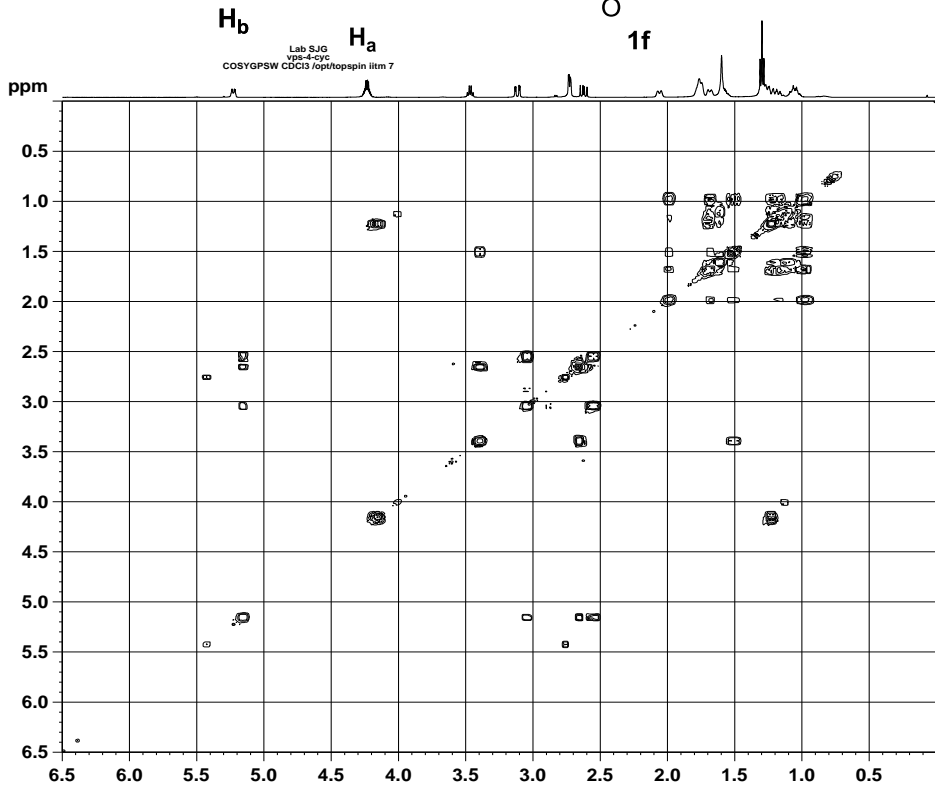

Current Data Parameters  
NAME Desktop  
EXPNO 167  
PROCNO 1

F2 - Acquisition Parameters  
Date\_ 20120615  
Time 11:41  
INSTRUM spect  
PROBHD 5 mm PABBO BB/  
PULPROG cosygpppf  
TD 2048  
SOLVENT CDC13  
NS 8  
DS 1  
SWH 4201.681 Hz  
FIDRES 2.051602 Hz  
AQ 0.2437620 sec  
RG 64  
DW 119.000 usec  
EC 6.50 usec  
TE 295.0 K  
D0 0.00000000 sec  
D1 1.00047795 sec  
D11 0.03000000 sec  
D12 0.00020000 sec  
D13 0.00004000 sec  
D16 0.00020000 sec  
IN0 0.00023000 sec

===== CHANNEL f1 =====  
NUC1 1H  
P0 11.75 usec  
P1 11.75 usec  
P17 2500.00 usec  
PLW1 15.3000019 W  
PLW10 3.1247997 W  
SFO1 500.1520316 MHz

===== GRADIENT CHANNEL =====  
GPNAM1 SMSQ10.100  
GP21 10.00 %  
P21 1000.00 usec

F1 - Acquisition parameters  
TD 128  
SFO1 500.152 MHz  
FIDRES 32.825630 Hz  
SW 8.401 ppm  
FMODE QF

F2 - Processing parameters  
SI 1024  
SF 500.1500468 MHz  
WDW QSINE  
SSB 0  
LB 0 Hz  
GB 0  
PC 1.40

F1 - Processing parameters  
SI 1024  
SF 500.1500468 MHz  
WDW SINC  
SSB 0  
LB 0 Hz  
GB 0

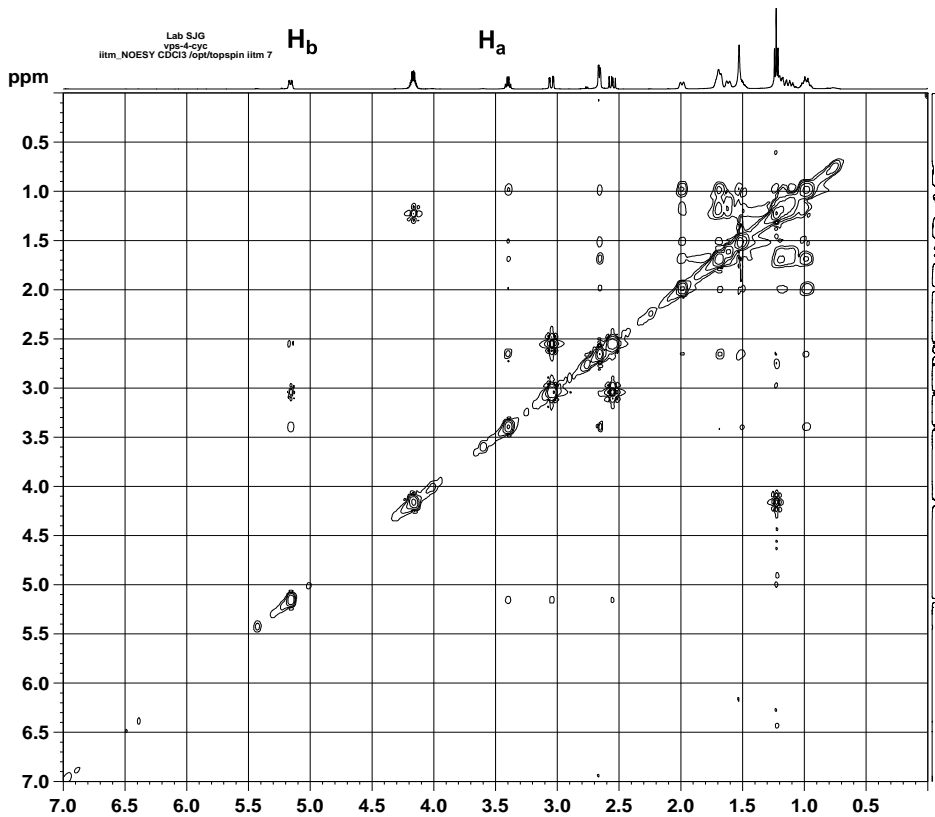

Current Data Parameters  
NAME Desktop  
EXPNO 170  
PROCNO 1

F2 - Acquisition Parameters  
Date\_ 20120615  
Time 12:00  
INSTRUM spect  
PROBHD 5 mm PABBO BB/  
PULPROG noesyppppf  
TD 1024  
SOLVENT CDC13  
NS 32  
DS 2  
SWH 4464.286 Hz  
FIDRES 4.359654 Hz  
AQ 0.1147230 sec  
RG 64  
DW 112.000 usec  
DE 6.50 usec  
TE 295.2 K  
D0 0.00000704 sec  
D1 0.98771179 sec  
D8 0.30000001 sec  
D11 0.03000000 sec  
D12 0.00020000 sec  
D16 0.00020000 sec  
IN0 0.00022400 sec

===== CHANNEL f1 =====  
NUC1 1H  
P1 11.75 usec  
P2 23.50 usec  
P17 2500.00 usec  
PLW1 15.3000019 W  
PLW10 3.1247997 W  
SFO1 500.1519646 MHz

===== GRADIENT CHANNEL =====  
GPNAM1 SMSQ10.100  
GP21 40.00 %  
P16 1000.00 usec

F1 - Acquisition parameters  
TD 256  
SFO1 500.152 MHz  
FIDRES 17.438616 Hz  
SW 8.326 ppm  
FMODE States-TPI1

F2 - Processing parameters  
SI 1024  
SF 500.1500465 MHz  
WDW QSINE  
SSB 2  
LB 0 Hz  
GB 0  
PC 1.00

F1 - Processing parameters  
SI 1024  
MC2 States-TPI1  
SF 500.1500465 MHz  
WDW SINE  
SSB 2  
LB 0 Hz  
GB 0

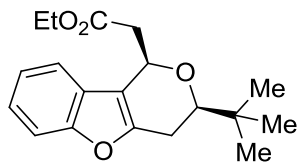

**1g**  
<sup>1</sup>H NMR in CDCl<sub>3</sub>

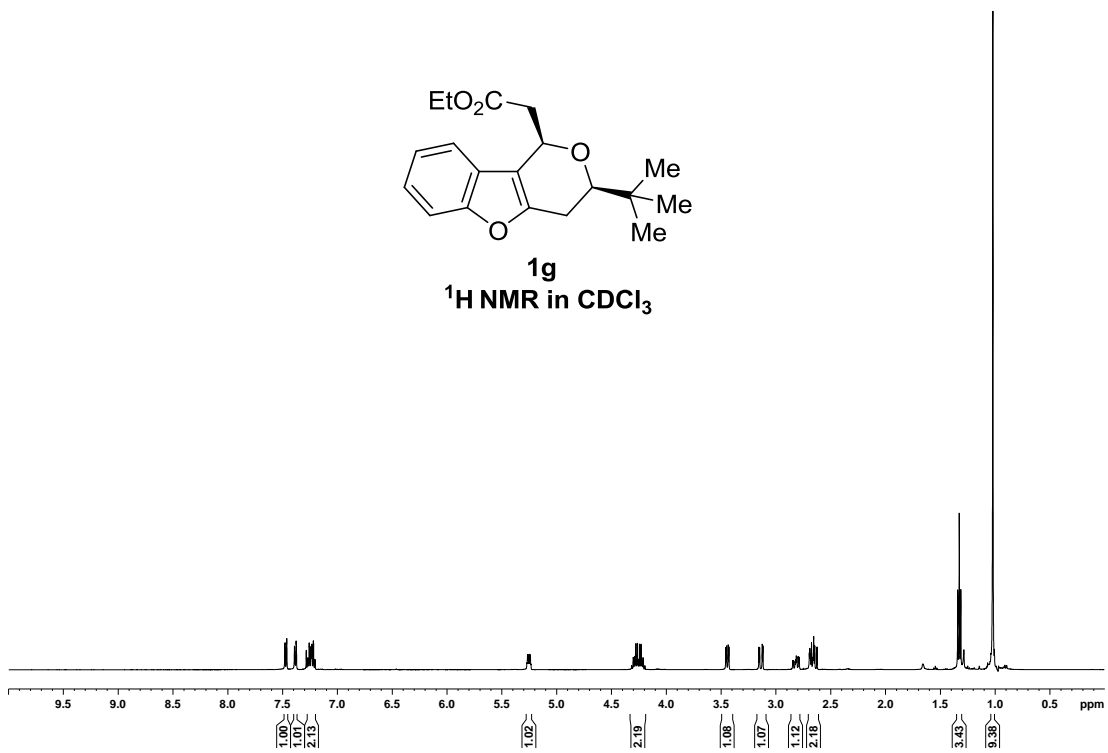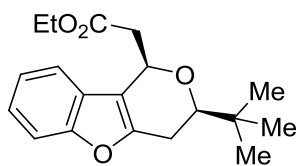

**1g**  
<sup>13</sup>C NMR in CDCl<sub>3</sub>

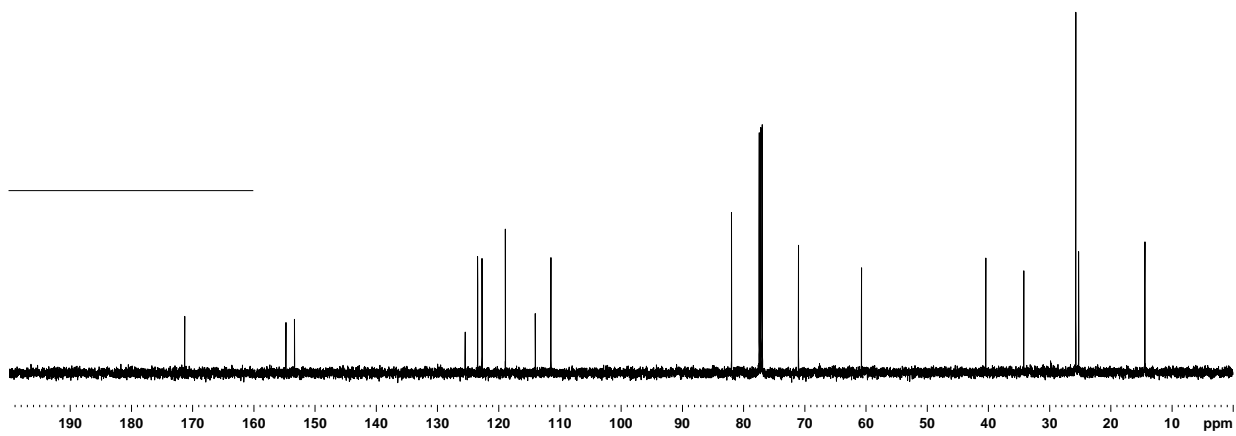

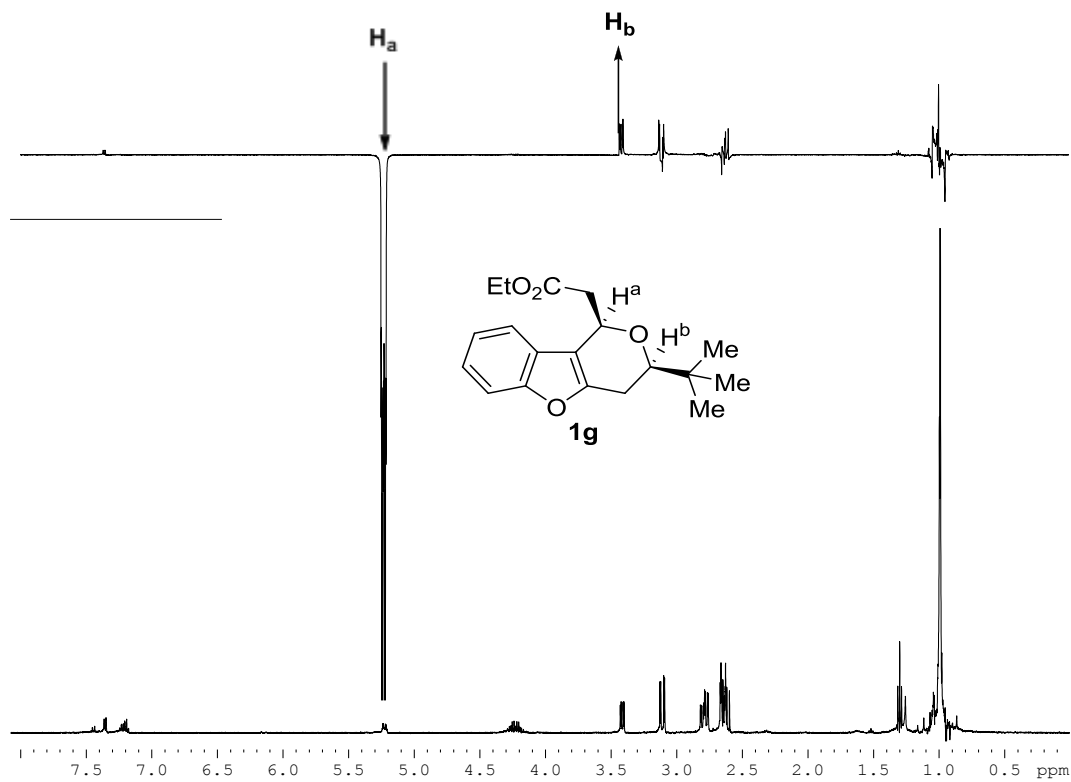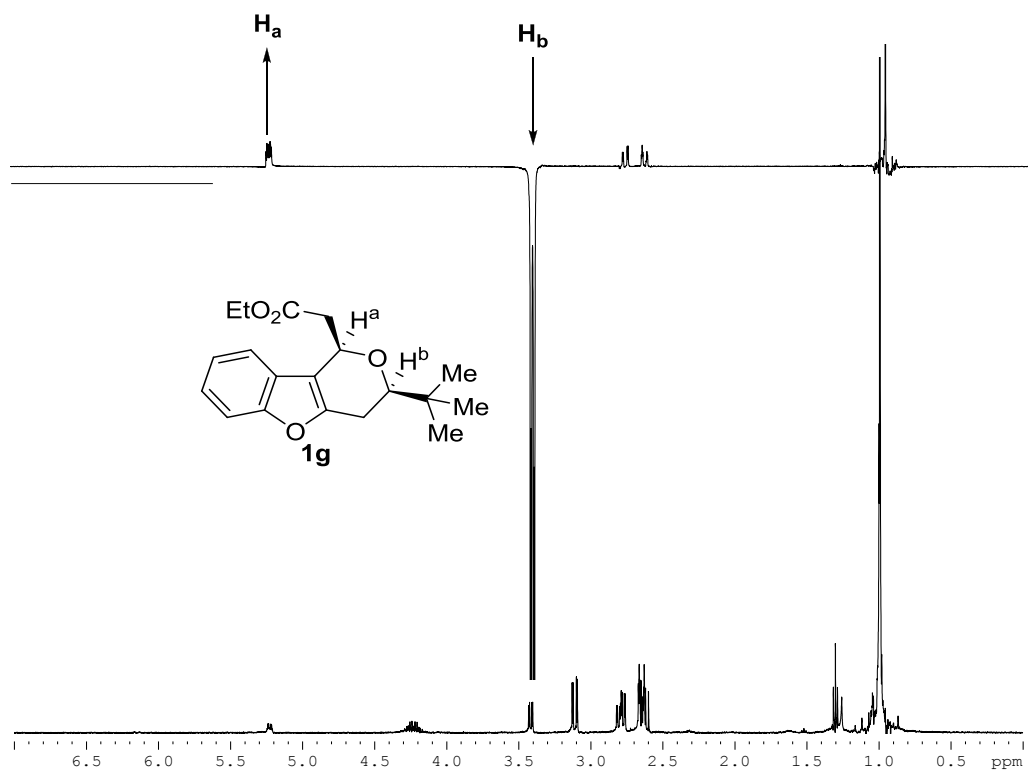



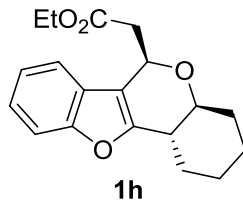

<sup>1</sup>H NMR in CDCl<sub>3</sub>

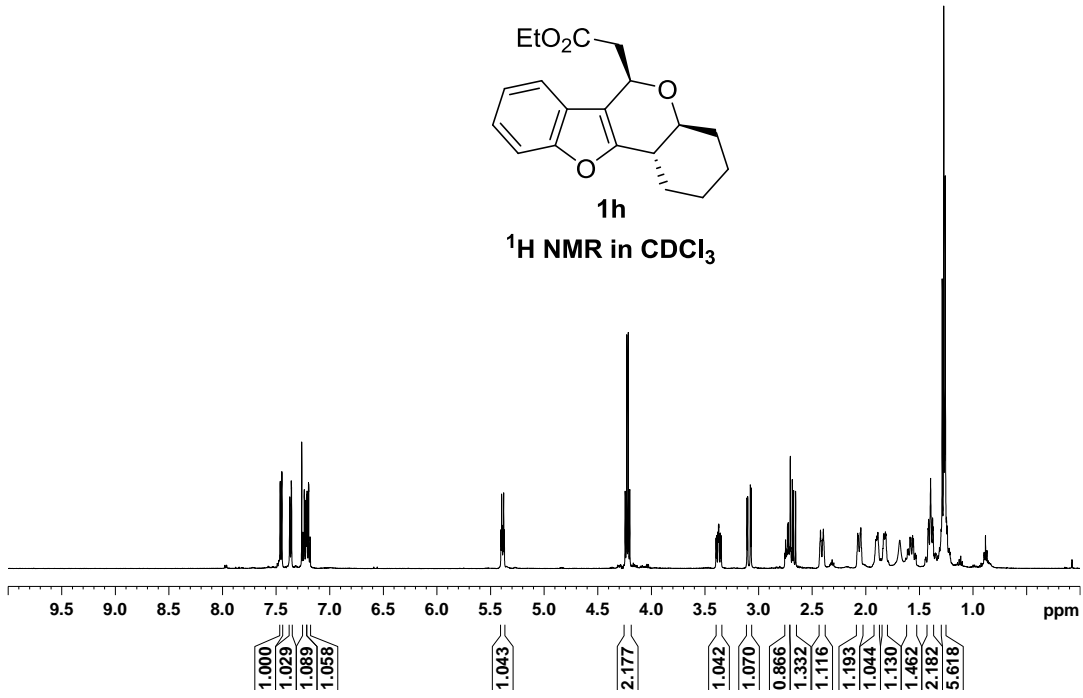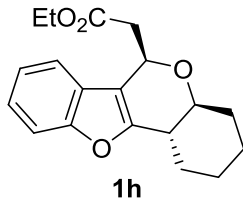

<sup>13</sup>C NMR in CDCl<sub>3</sub>

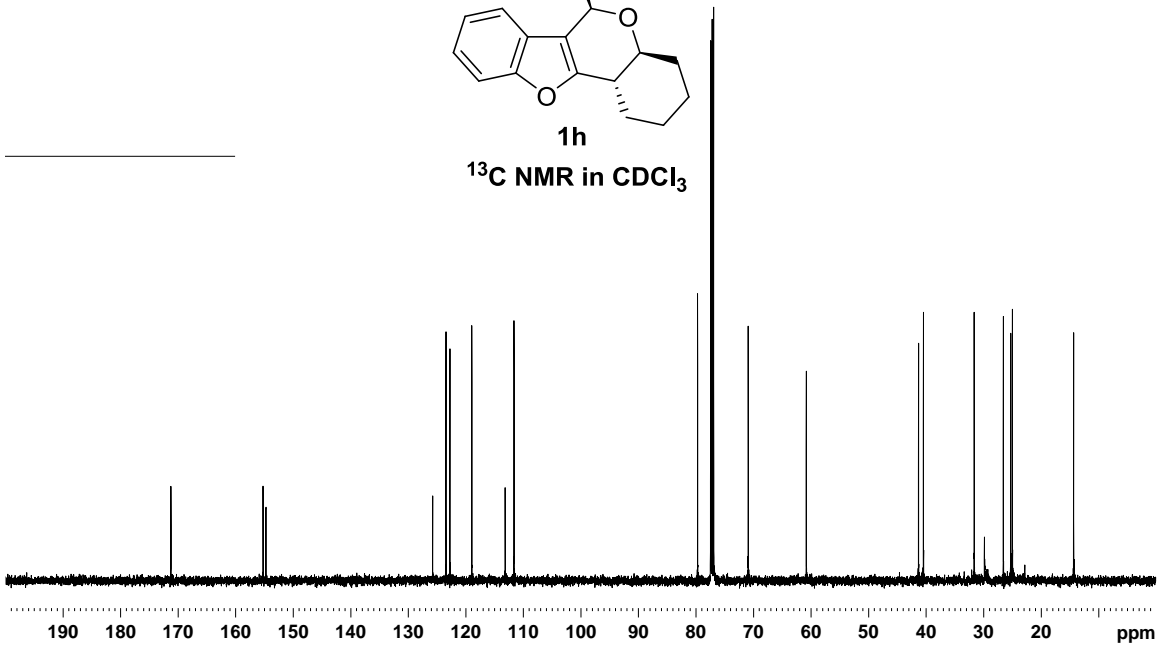

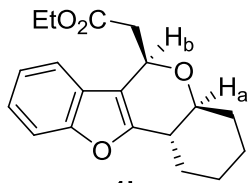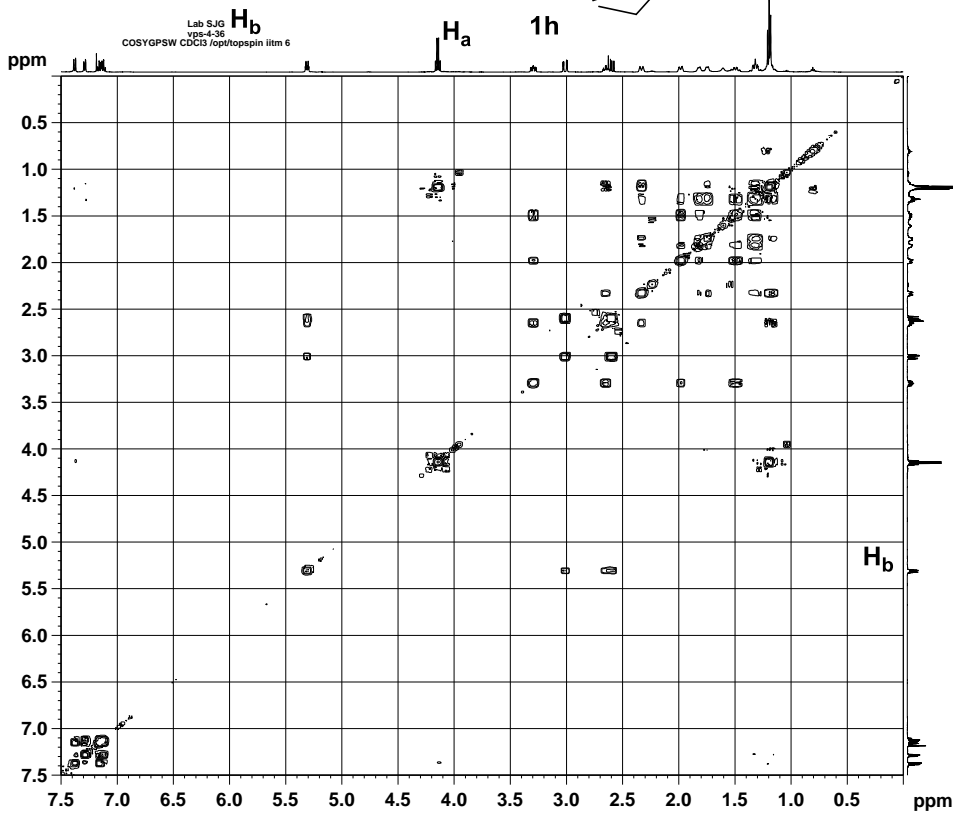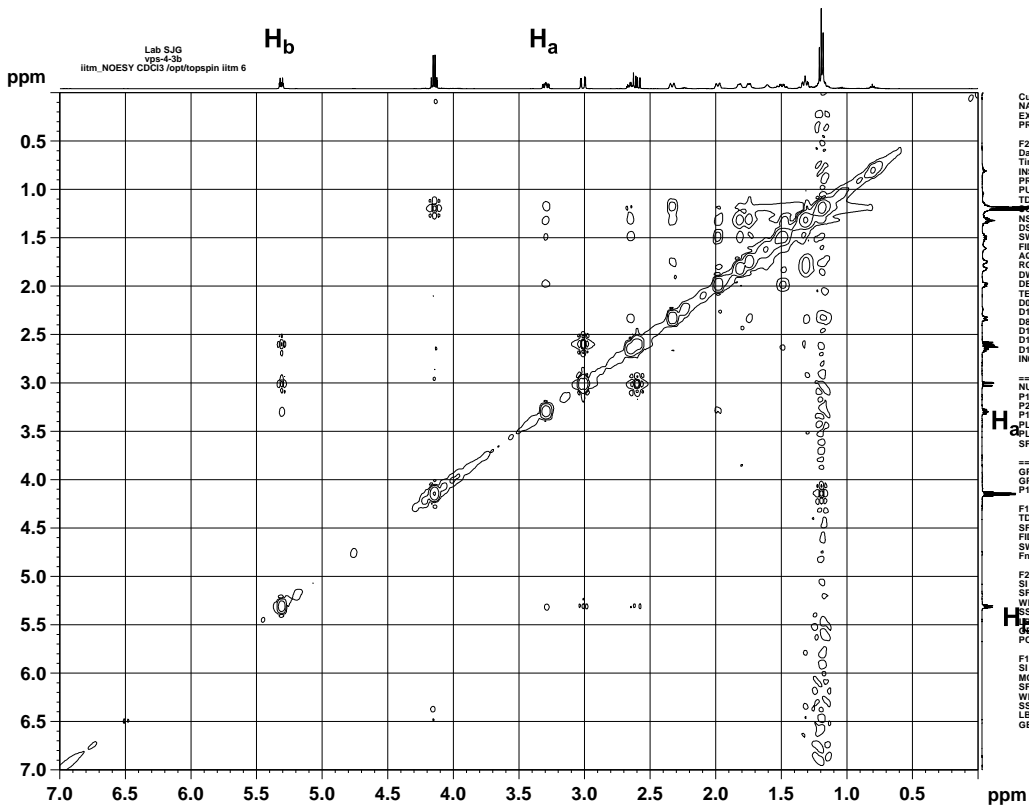

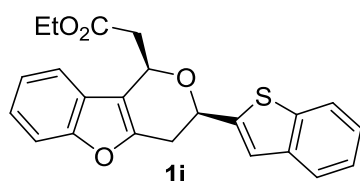

<sup>1</sup>H NMR in CDCl<sub>3</sub>

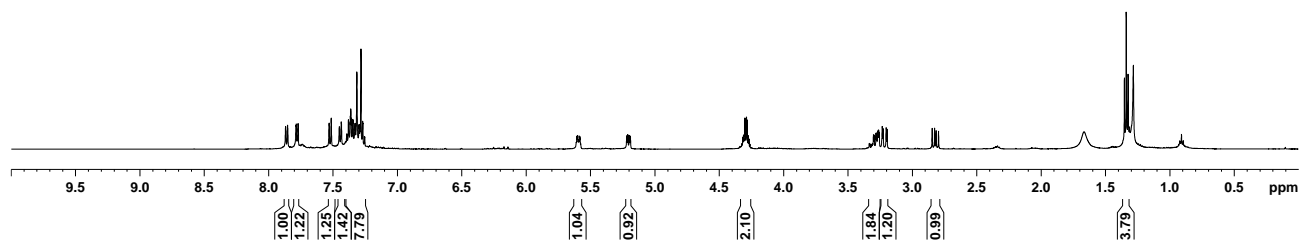

SJG-VPS-7-17-13C

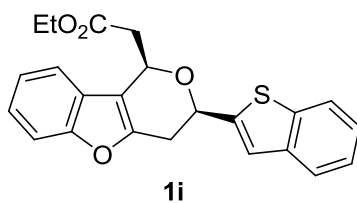

<sup>13</sup>C NMR in CDCl<sub>3</sub>

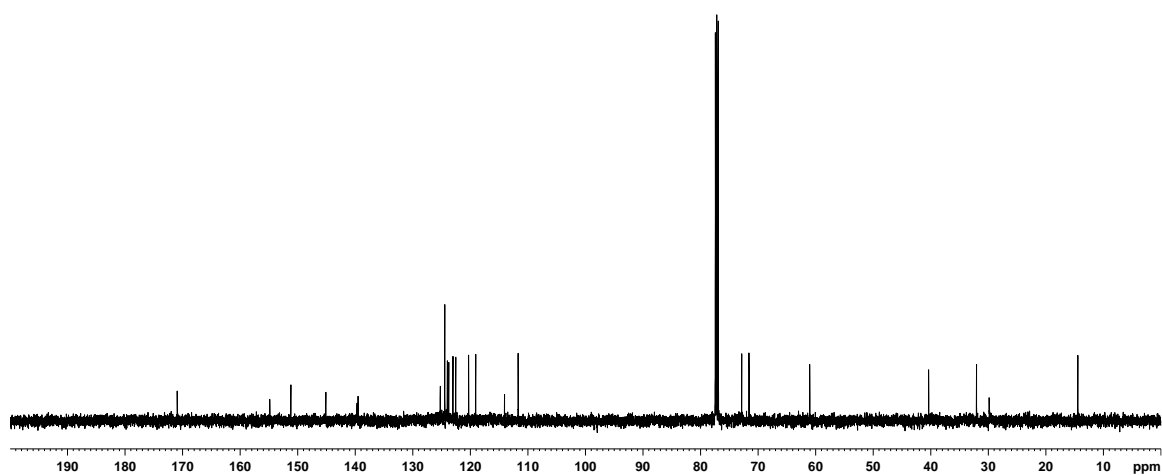

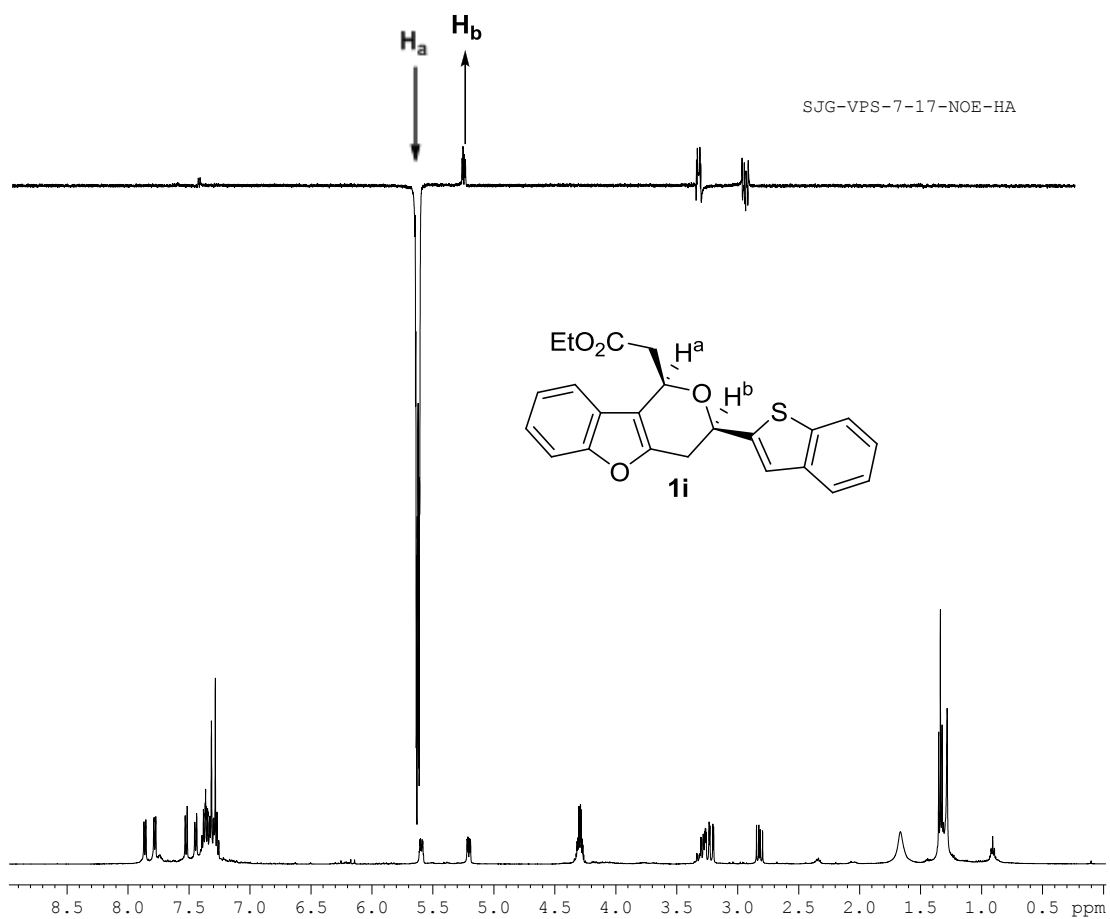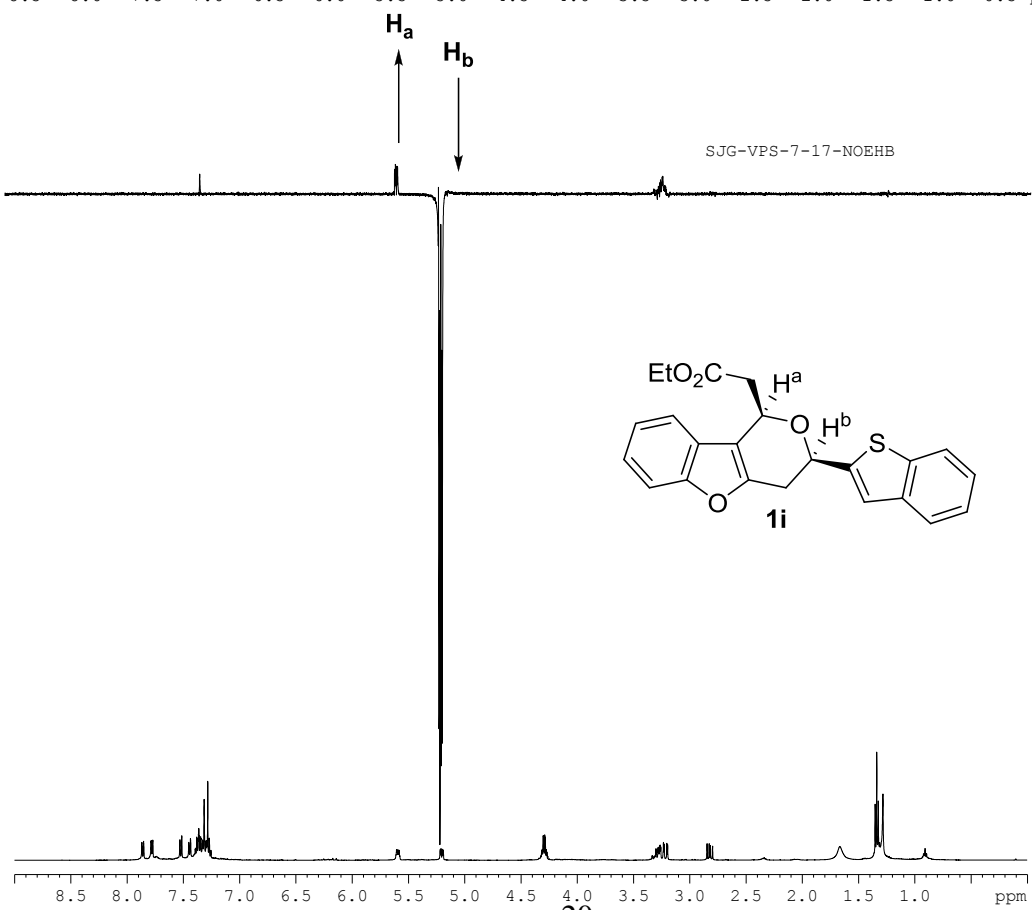

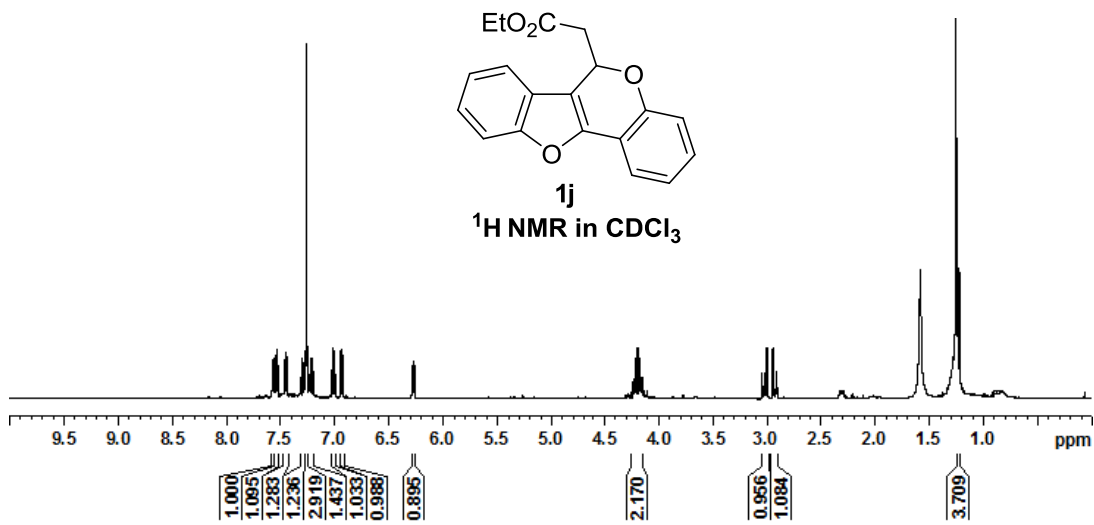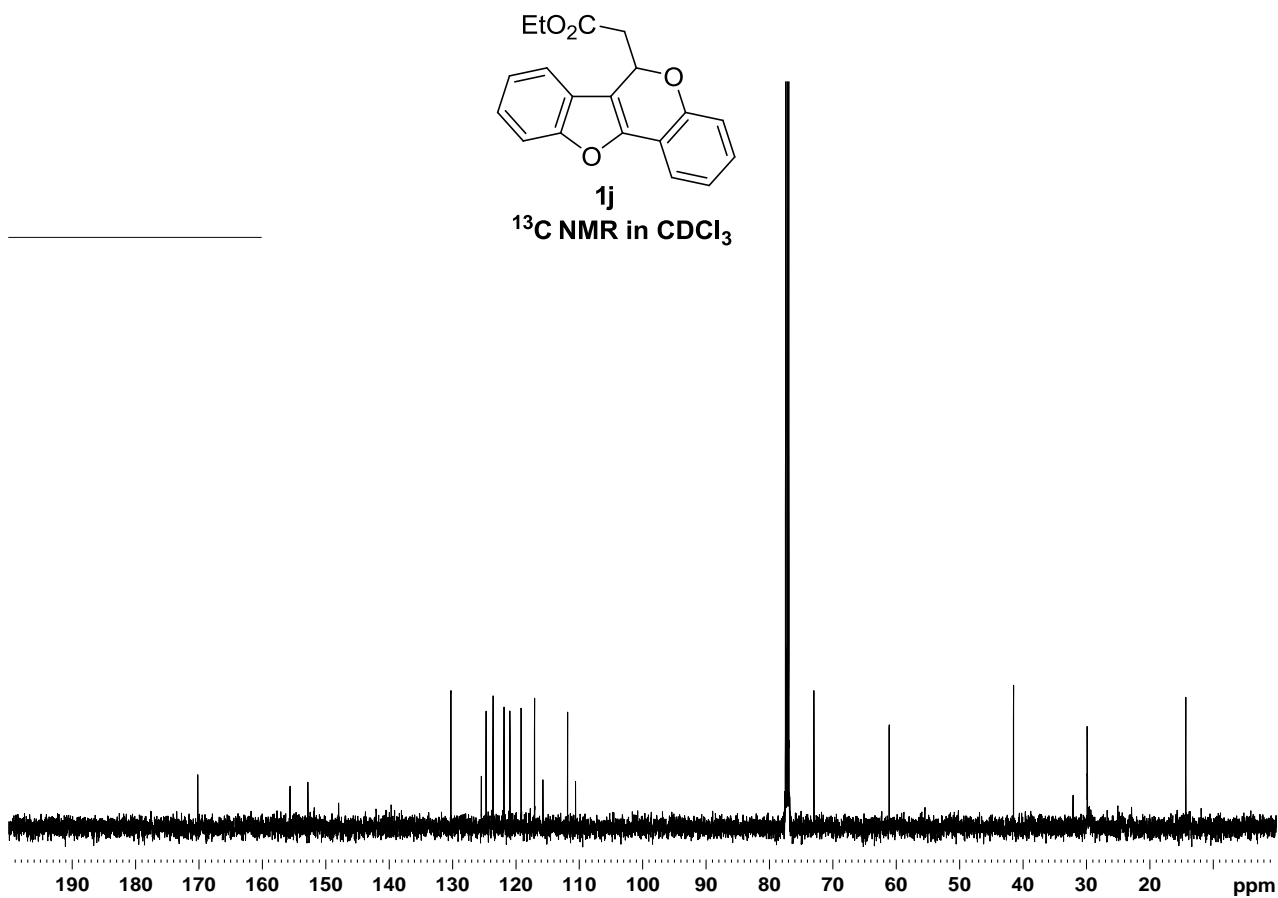

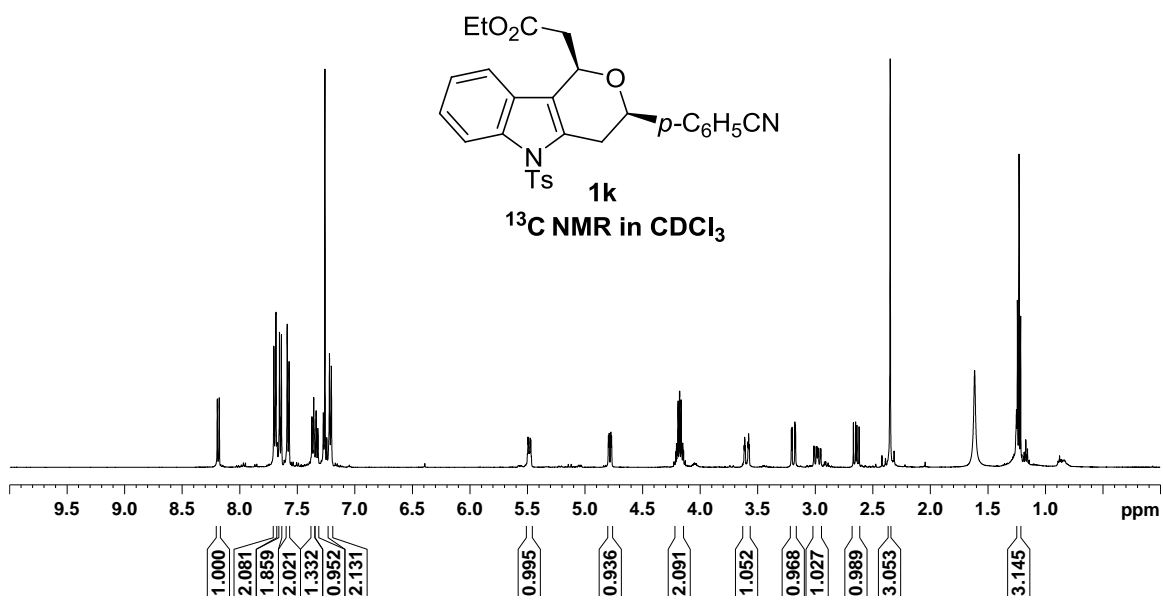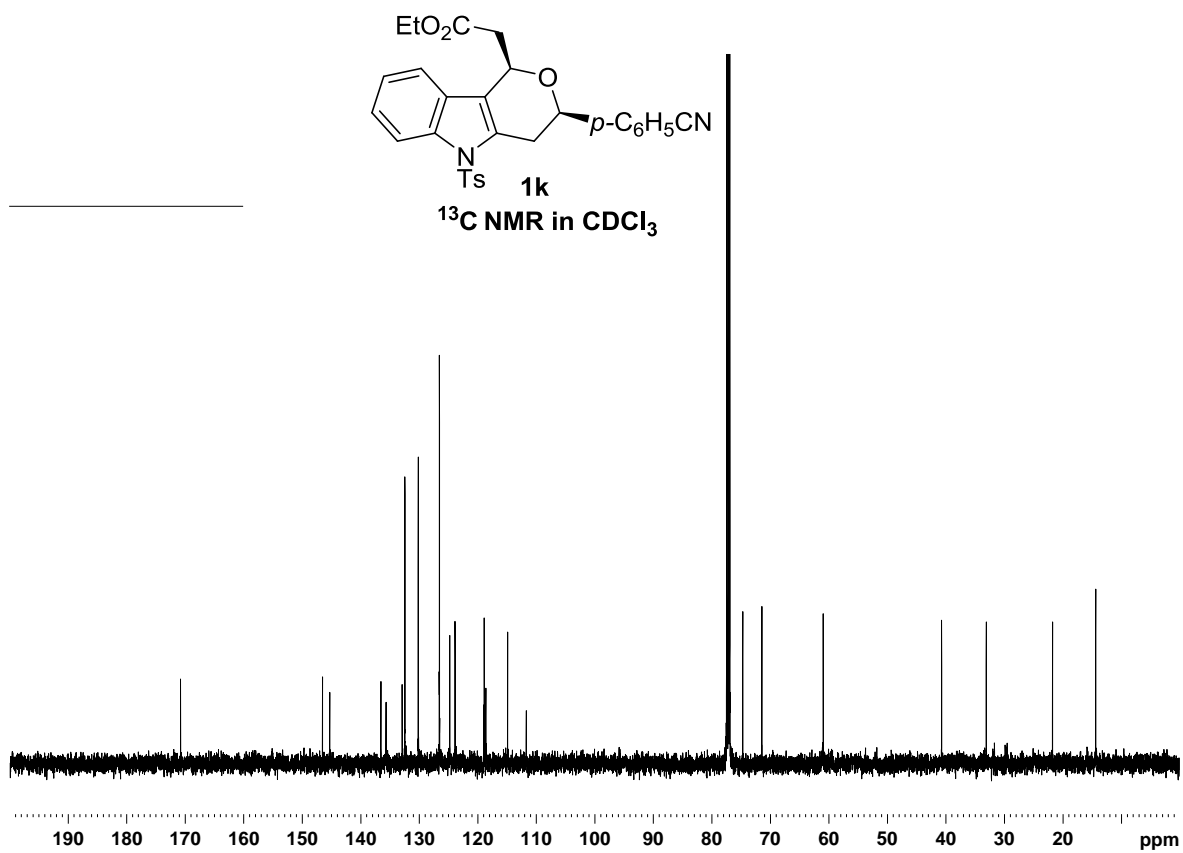

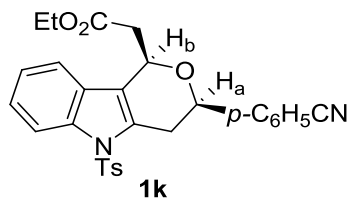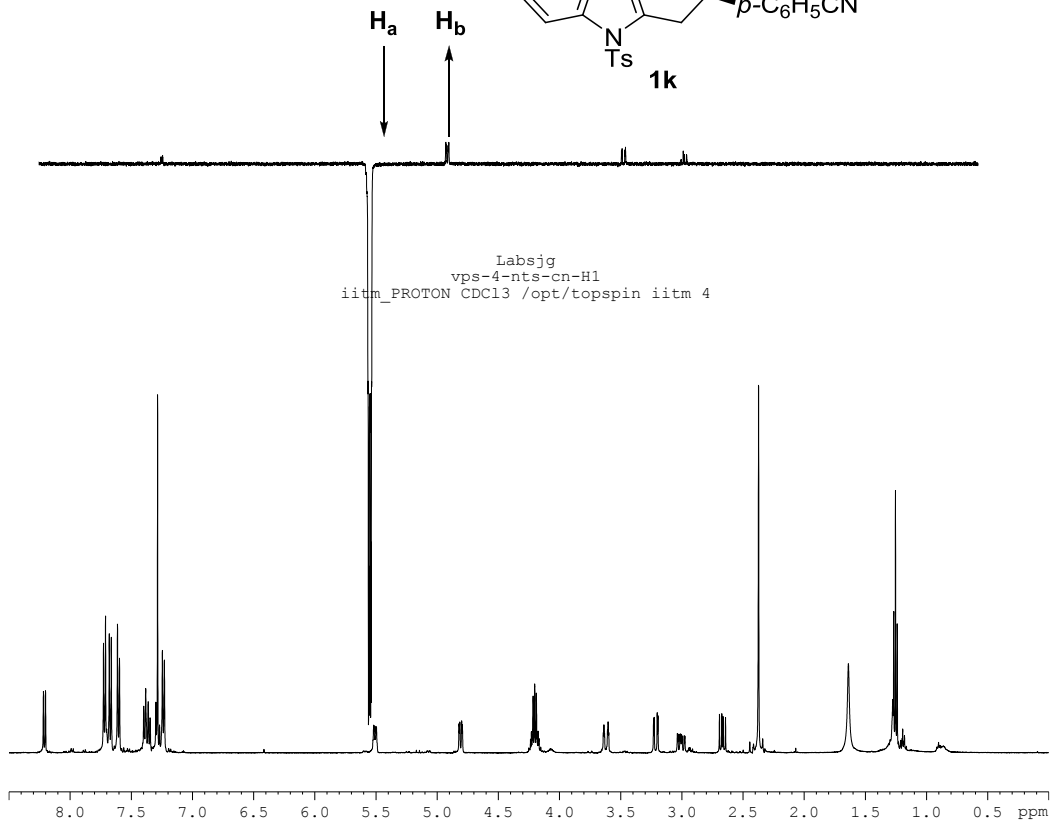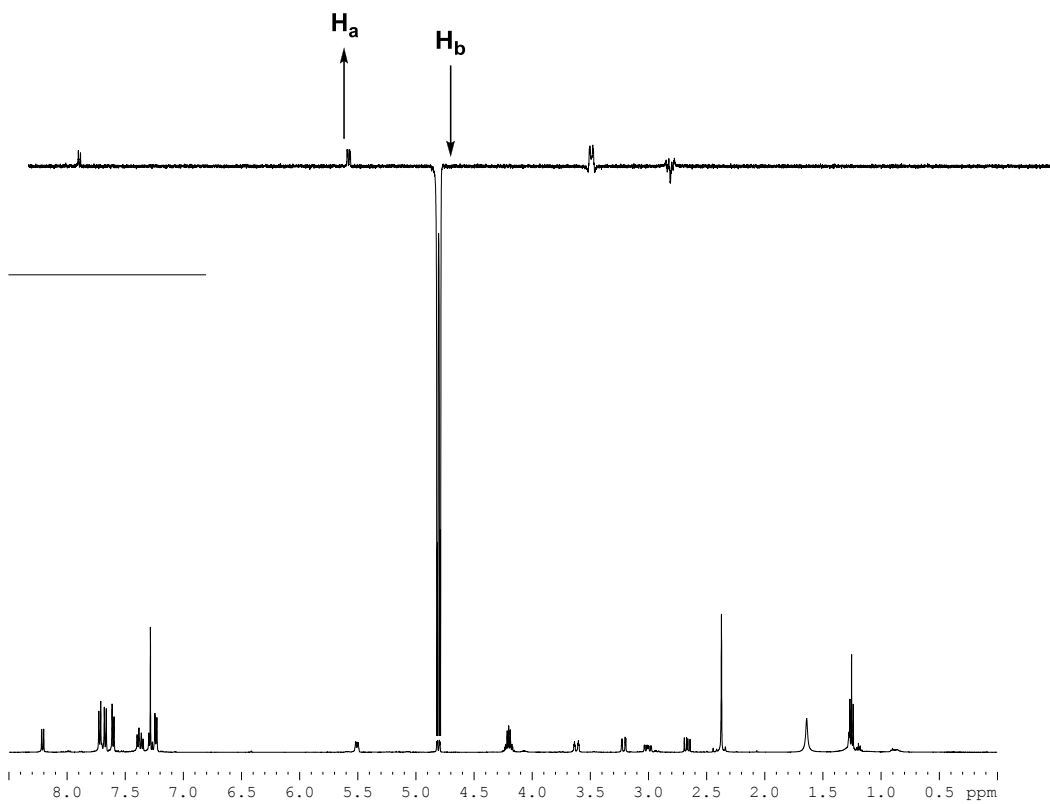

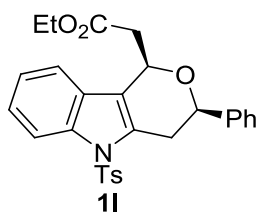

<sup>1</sup>H NMR in CDCl<sub>3</sub>

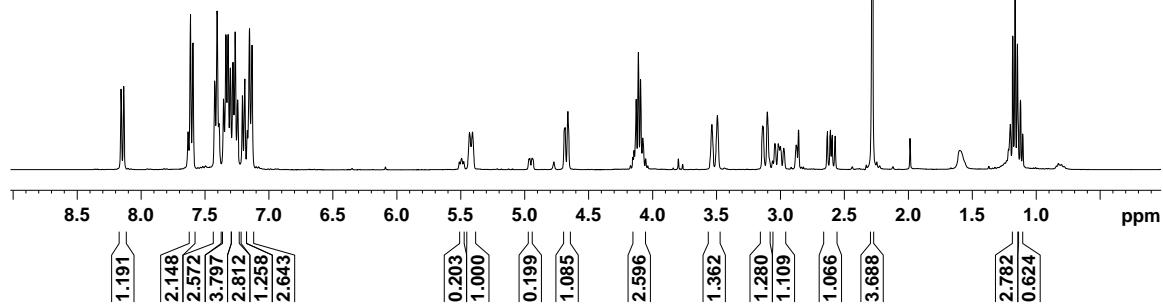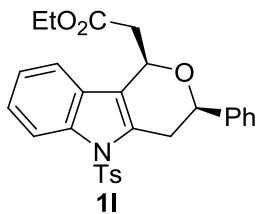

<sup>13</sup>C NMR in CDCl<sub>3</sub>

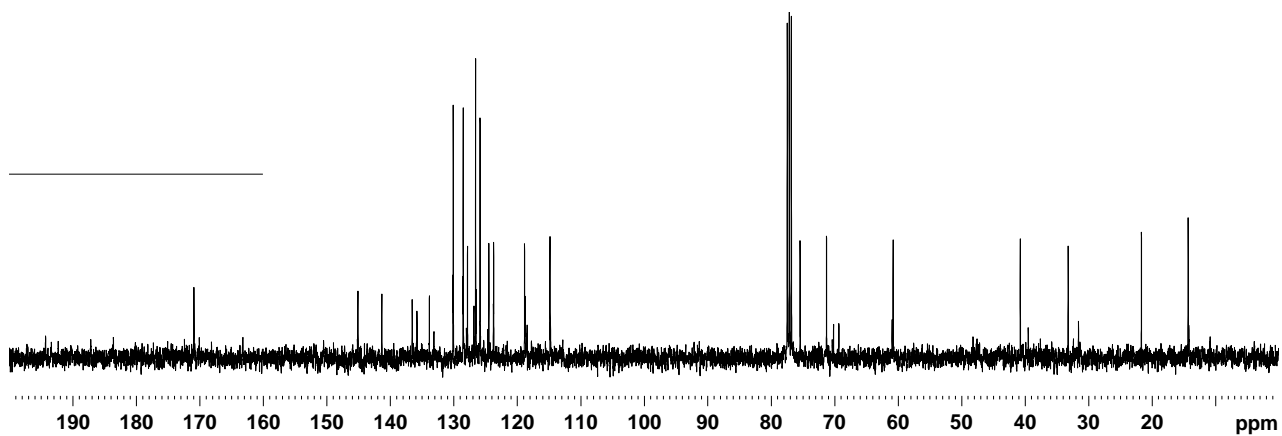



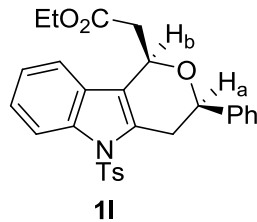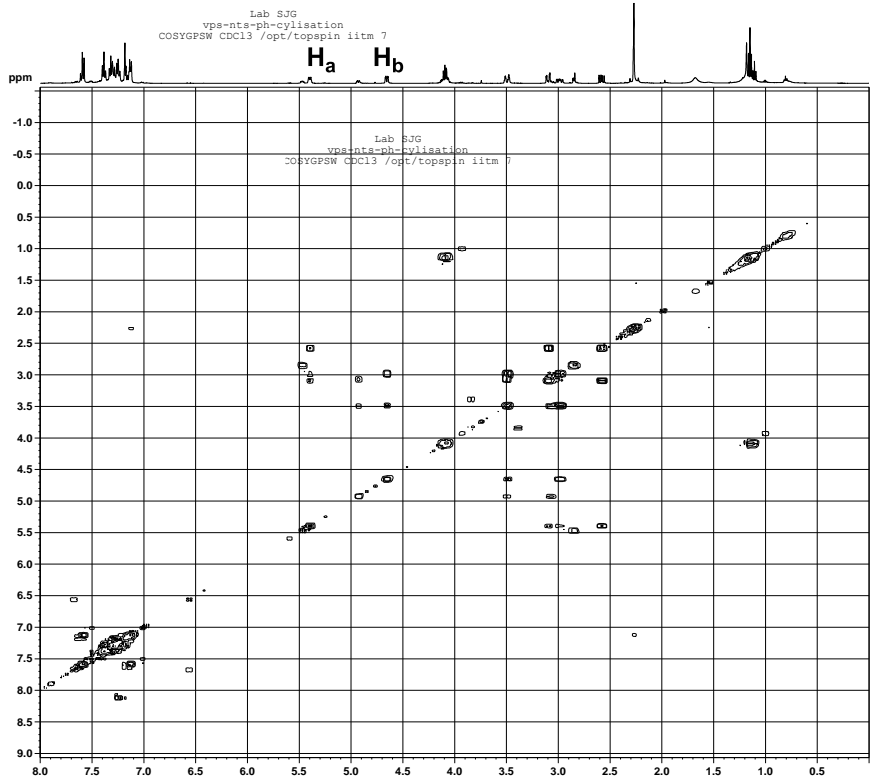

Current Data Parameters  
NAME sjg50712  
EXPNO 151  
PROCNO 1

F2 - Acquisition Parameters  
Date\_ 20120730  
Time 11.08  
INSTRUM spect  
PROBHD 5 mm PABBO BB/  
PULPROG cosygpppqf  
TD 2048  
SOLVENT CDC13  
NS 1  
DS 8  
SWH 5319.149 Hz  
FIDRES 2.597241 Hz  
AQ 0.1925620 sec  
RG 64  
DW 94.000 usec  
DE 6.50 usec  
TE 296.0 K  
D0 0.0000300 sec  
D1 1.96067798 sec  
D11 0.03000000 sec  
D12 0.00002000 sec  
D13 0.00000400 sec  
D16 0.00020000 sec  
IN0 0.00018800 sec

----- CHANNEL f1 -----  
NUC1 1H  
P0 11.75 usec  
P1 11.75 usec  
P17 2500.00 usec  
PLW1 15.3000019 W  
PLW10 3.1247997 W  
SFO1 500.1519253 MHz

----- GRADIENT CHANNEL -----  
GPM1 SMSG10.100  
GP2 10.00 %  
P16 1000.00 usec

F1 - Acquisition parameters  
TD 128  
SFO1 500.1519 MHz  
FIDRES 41.555851 Hz  
AQ 10.635 ppm  
PRMODE QF

F2 - Processing parameters  
SI 1024  
SF 500.1500501 MHz  
WDW 0  
SSB 0  
LB 0 Hz  
GB 0  
PC 1.40

F1 - Processing parameters  
SI 1024  
MC2 QF  
SF 500.1500501 MHz  
WDW States-TPPI  
SSB 0  
LB 0 Hz  
GB 0

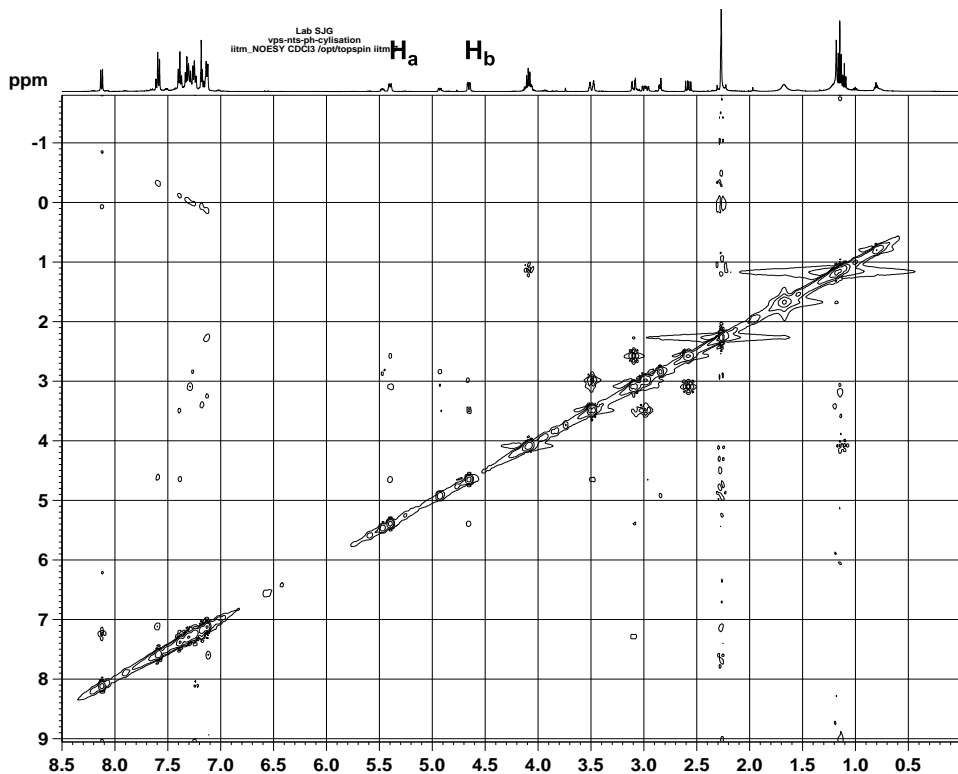

Current Data Parameters  
NAME sjg50712  
EXPNO 154  
PROCNO 1

F2 - Acquisition Parameters  
Date\_ 20120730  
Time 12.10  
INSTRUM spect  
PROBHD 5 mm PABBO BB/  
PULPROG noesypppp  
TD 1024  
SOLVENT CDC13  
NS 2  
DS 32  
SWH 5434.783 Hz  
FIDRES 5.307405 Hz  
AQ 0.0942580 sec  
RG 64  
DW 92.000 usec  
DE 6.50 usec  
TE 296.1 K  
D0 0.0000704 sec  
D1 1.00819184 sec  
D8 0.0000001 sec  
D11 0.03000000 sec  
D13 0.00002000 sec  
D16 0.00020000 sec  
IN0 0.00018400 sec

----- CHANNEL f1 -----  
NUC1 1H  
P1 11.75 usec  
P2 23.50 usec  
P7 2500.00 usec  
PLW1 15.3000019 W  
PLW10 3.1247997 W  
SFO1 500.1518625 MHz

----- GRADIENT CHANNEL -----  
GPM1 SMSG10.100  
GP2 40.00 %  
P16 1000.00 usec

F1 - Acquisition parameters  
TD 256  
SFO1 500.1519 MHz  
FIDRES 21.228520 Hz  
AQ 10.866 ppm  
PRMODE States-TPPI

F2 - Processing parameters  
SI 1024  
SF 500.1500499 MHz  
WDW 0  
SSB 2  
LB 0 Hz  
GB 0  
PC 1.00

F1 - Processing parameters  
SI 1024  
MC2 States-TPPI  
SF 500.1500499 MHz  
WDW SINE  
SSB 2  
LB 0 Hz  
GB 0

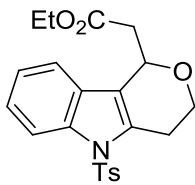

**1m**

**<sup>1</sup>H NMR in CDCl<sub>3</sub>**

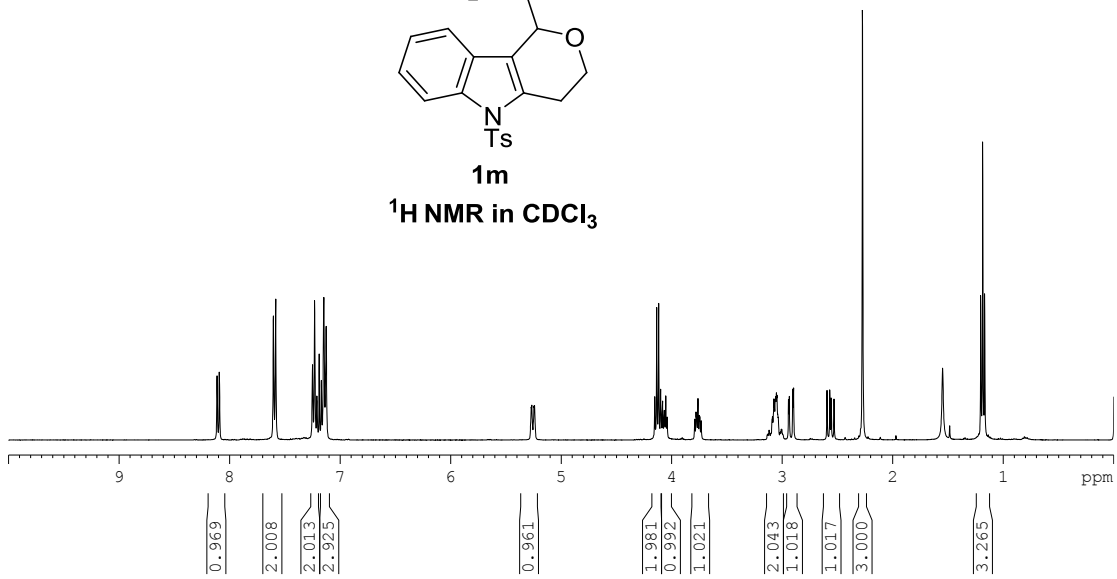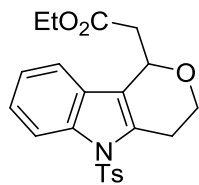

**1m**

**<sup>13</sup>C NMR in CDCl<sub>3</sub>**

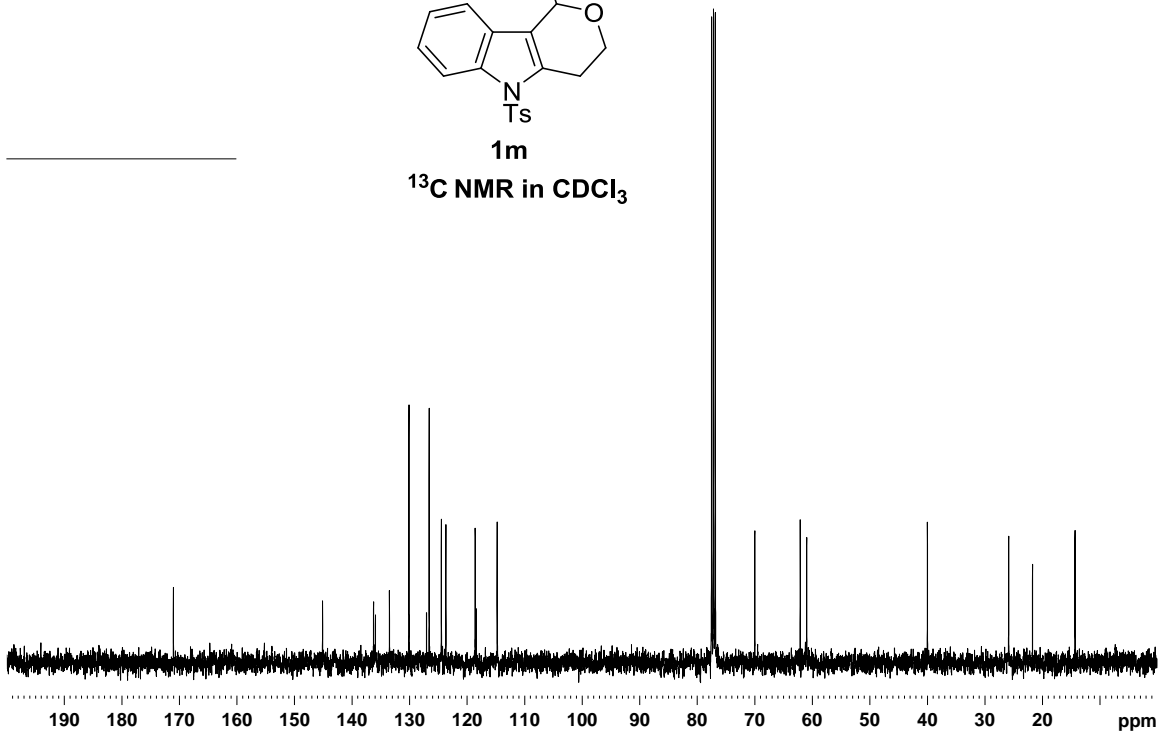

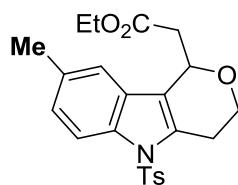

**1n**

<sup>1</sup>H NMR in CDCl<sub>3</sub>

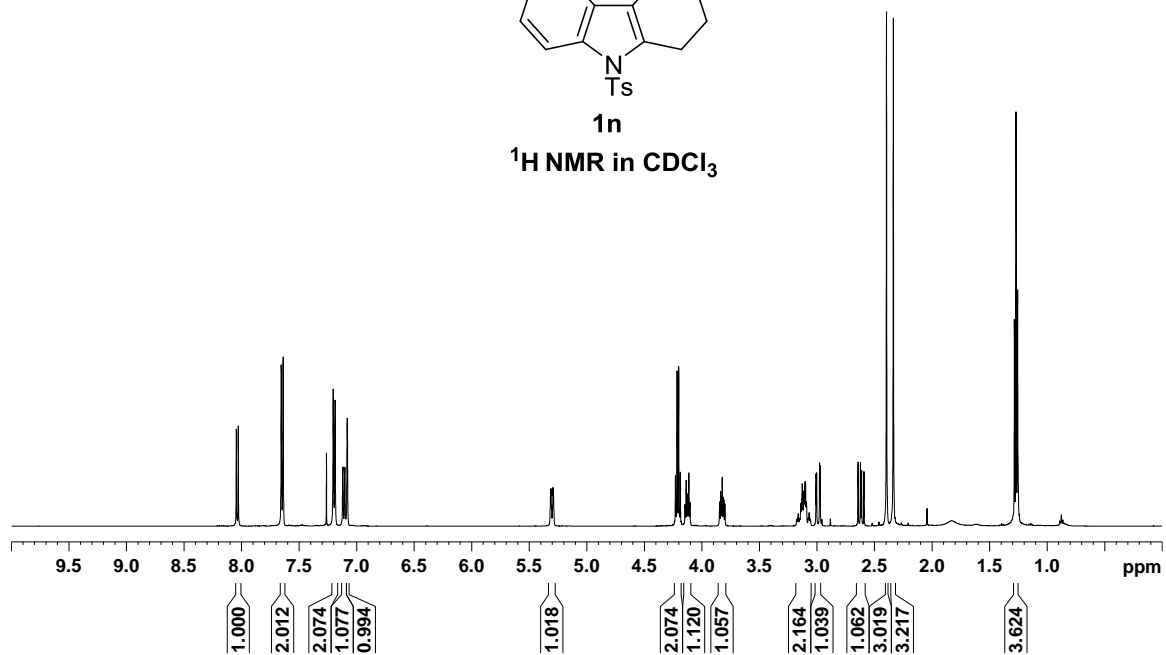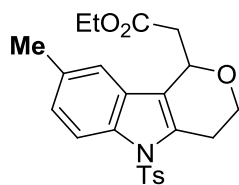

**1n**

<sup>13</sup>C NMR in CDCl<sub>3</sub>

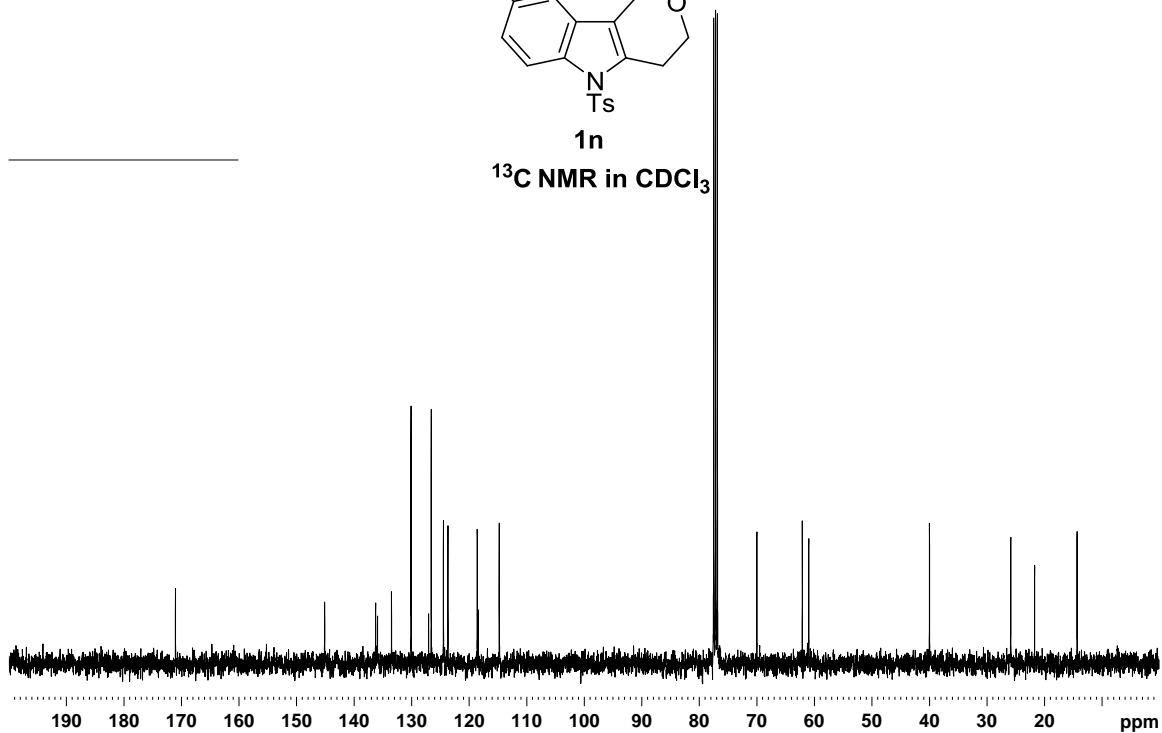

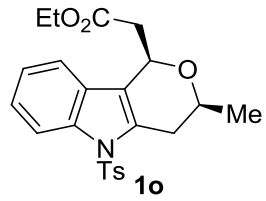

<sup>1</sup>H NMR in CDCl<sub>3</sub>

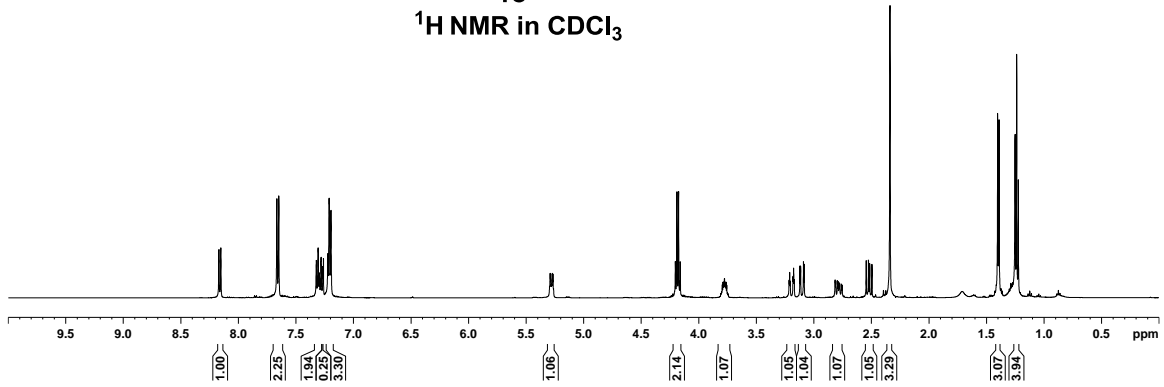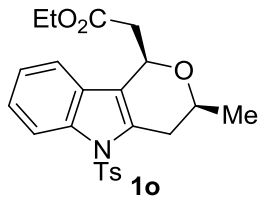

<sup>13</sup>C NMR in CDCl<sub>3</sub>

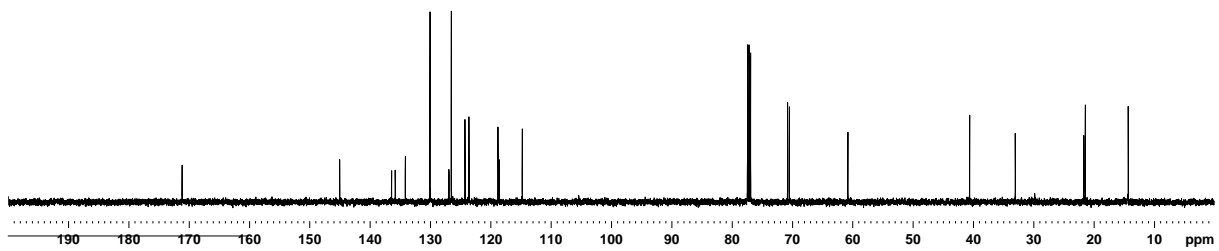

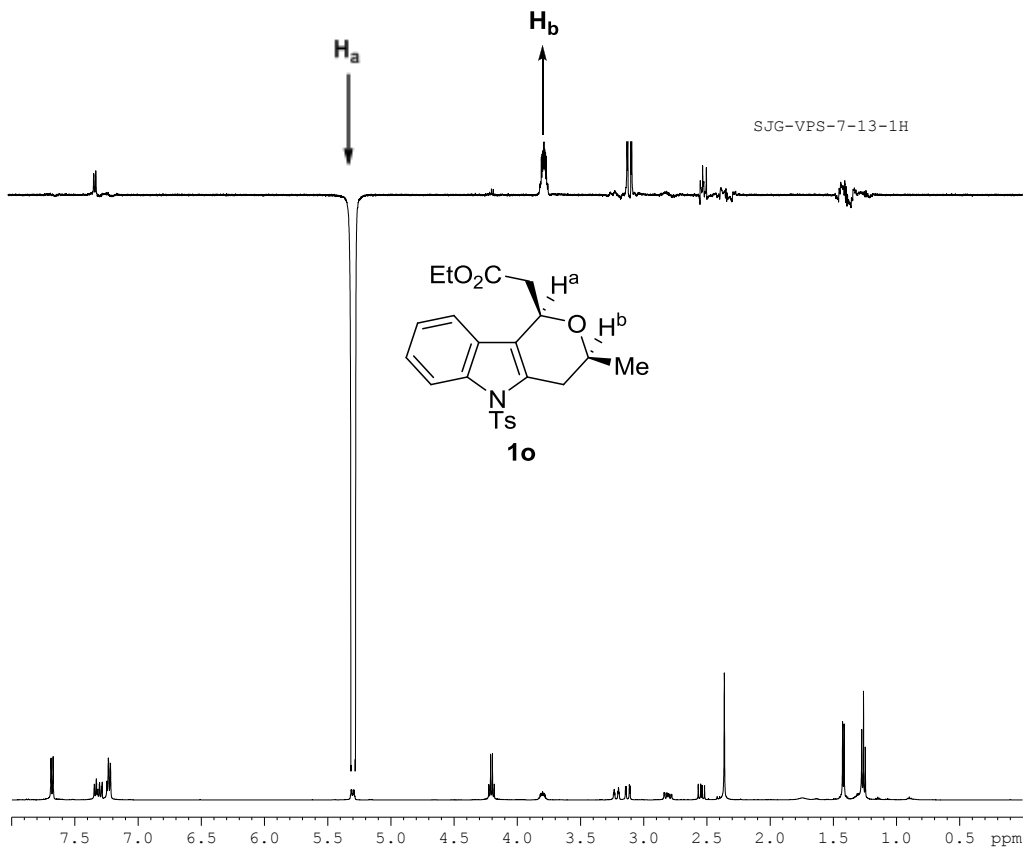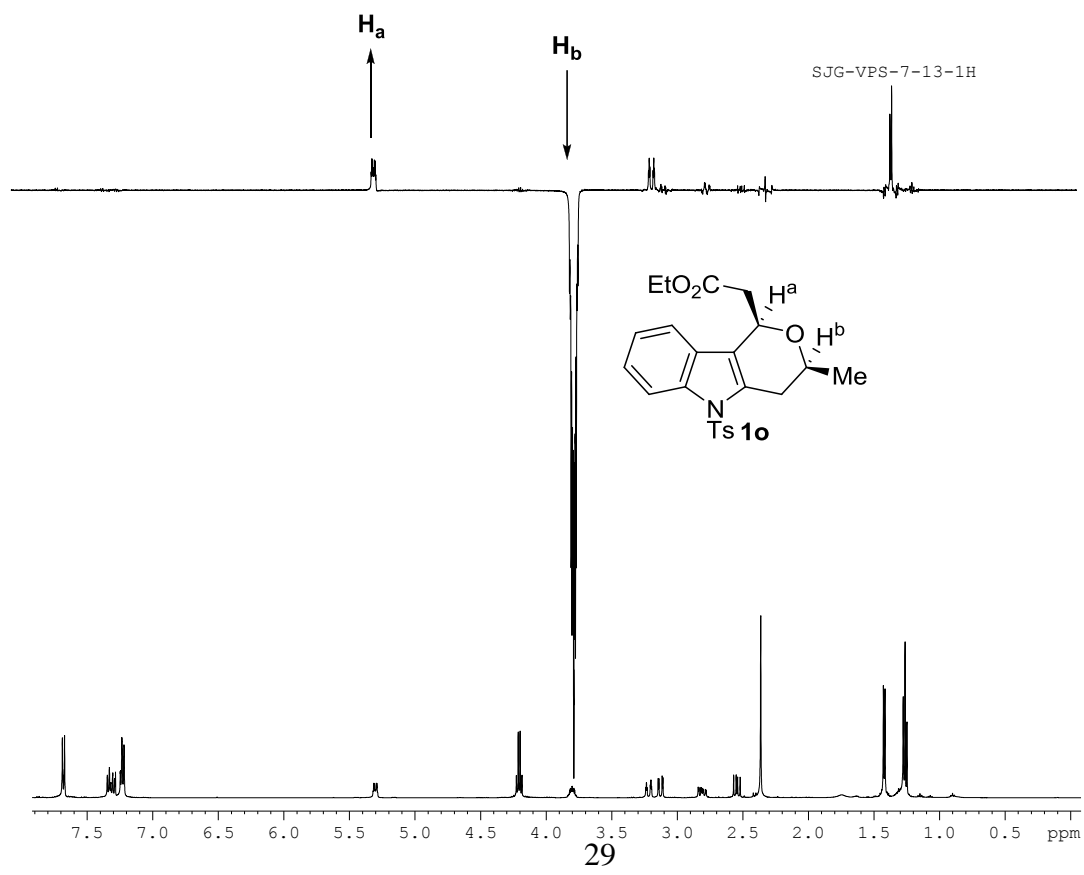

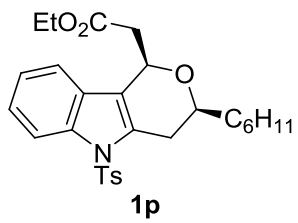

<sup>1</sup>H NMR in CDCl<sub>3</sub>

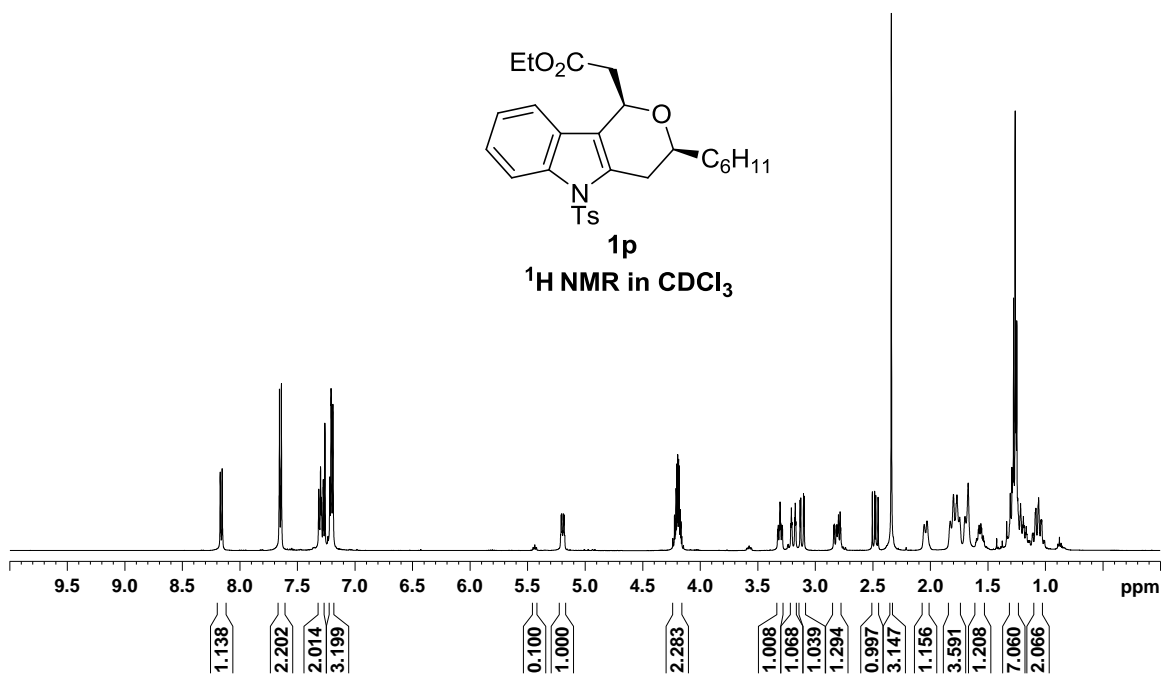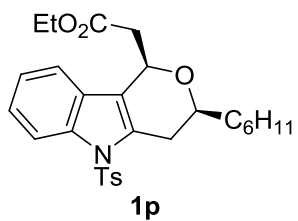

<sup>13</sup>C NMR in CDCl<sub>3</sub>

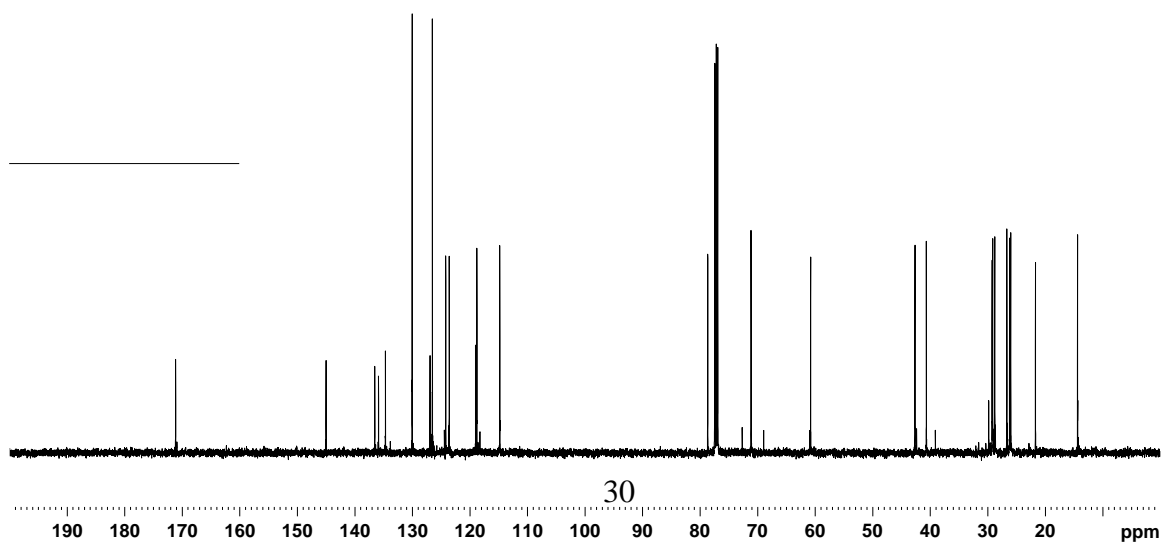

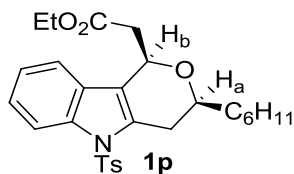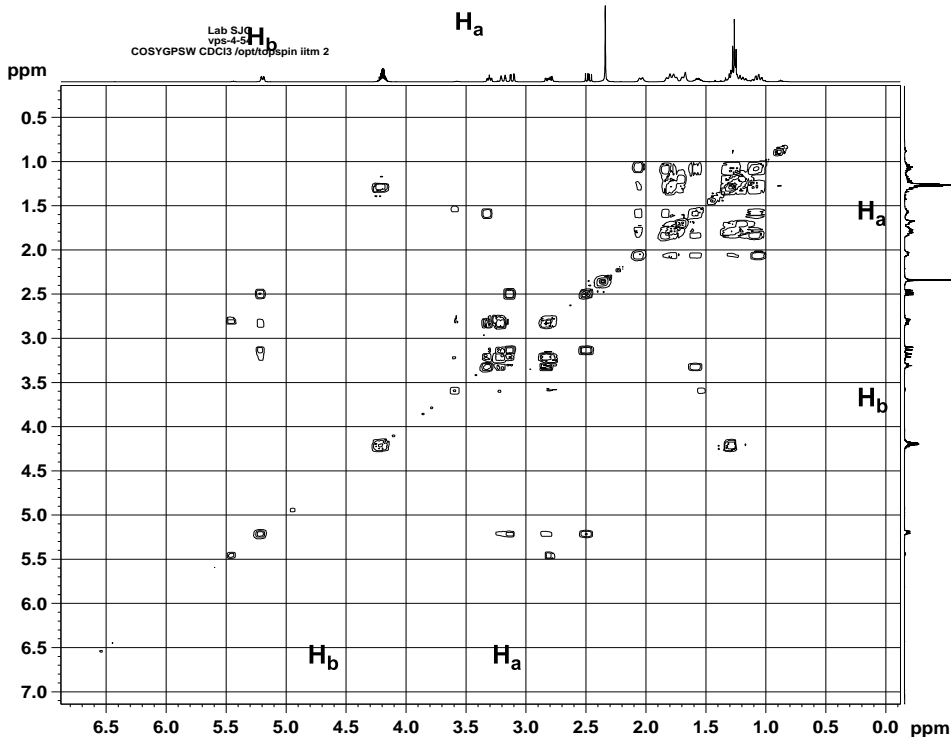

Current Data Parameters  
NAME Desktop  
EXPNO 46  
PROCNO 1

F2 - Acquisition Parameters  
Date\_ 20120605  
Time 9.24  
INSTRUM spect  
PROBHD 5 mm F4BBO BB/  
PULPROG cosygpppgf/  
TD 2048  
SOLVENT CDCI3  
NS 1  
DS 8  
SWH 4504.504 Hz  
FIDRES 2.199465 Hz  
AQ 0.2273760 sec  
RG 19.19  
DW 111.000 usec  
DE 6.50 usec  
TE 292.1 K  
D0 0.00000300 sec  
D1 1.92586195 sec  
D11 0.03000000 sec  
D12 0.00002000 sec  
D13 0.00000400 sec  
D16 0.00020000 sec  
IN0 0.00022000 sec

===== CHANNEL f1 =====  
NUC1 1H  
P1 11.75 usec  
P2 23.50 usec  
PLW1 15.3000019 W  
PLW10 3.12479997 W  
SFO1 500.1521576 MHz

===== GRADIENT CHANNEL =====  
GPNAM1 SMSQ10.100  
GPZ1 10.00 %  
P16 1000.00 usec

F1 - Acquisition parameters  
TD 128  
SFO1 500.1522 MHz  
FIDRES 35.191441 Hz  
SW 9.006 ppm  
FhMODE CF

F2 - Processing parameters  
SI 1024  
SF 500.1500000 MHz  
WDW QSINE  
SSB 0  
LB 0 Hz  
GB 0  
PC 1.40

F1 - Processing parameters  
SI 1024  
MC2 CF  
SF 500.1500000 MHz  
WDW States-TPPI  
SSB 0  
LB 0 Hz  
GB 0

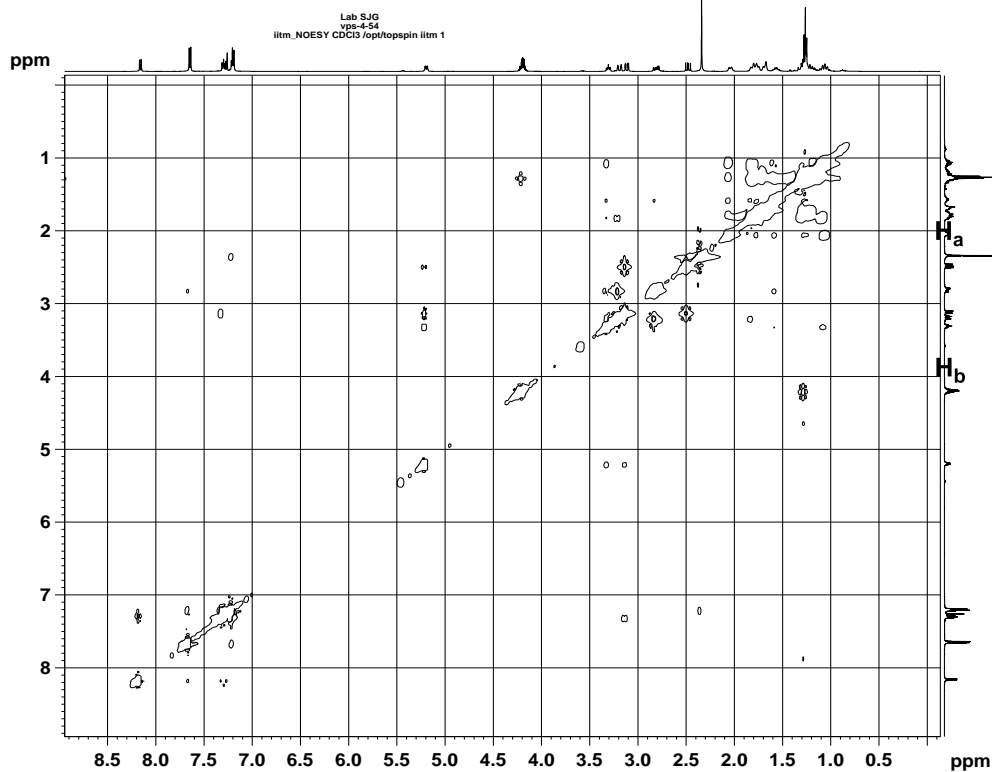

Current Data Parameters  
NAME Desktop  
EXPNO 59  
PROCNO 1

F2 - Acquisition Parameters  
Date\_ 20120605  
Time 14.04  
INSTRUM spect  
PROBHD 5 mm F4BBO BB/  
PULPROG noesygpph  
TD 1024  
SOLVENT CDCI3  
NS 62  
DS 32  
SWH 4545.455 Hz  
FIDRES 4.438920 Hz  
AQ 0.1128900 sec  
RG 21.7  
DW 116.000 usec  
DE 6.50 usec  
TE 291.6 K  
D0 0.00000564 sec  
D1 0.98975992 sec  
D8 0.30000001 sec  
D11 0.03000000 sec  
D12 0.00002000 sec  
D16 0.00020000 sec  
IN0 0.00022000 sec

===== CHANNEL f1 =====  
NUC1 1H  
P1 11.75 usec  
P2 23.50 usec  
PLW1 15.3000019 W  
PLW10 3.12479997 W  
SFO1 500.1522008 MHz

===== GRADIENT CHANNEL =====  
GPNAM1 SMSQ10.100  
GRZ1 40.00 %  
P16 1000.00 usec

F1 - Acquisition parameters  
TD 256  
SFO1 500.1522 MHz  
FIDRES 17.755682 Hz  
SW 9.006 ppm  
FhMODE States-TPPI

F2 - Processing parameters  
SI 1024  
SF 500.1500000 MHz  
WDW QSINE  
SSB 0  
LB 0 Hz  
GB 0  
PC 1.00

F1 - Processing parameters  
SI 1024  
MC2 States-TPPI  
SF 500.1500000 MHz  
WDW SINE  
SSB 2  
LB 0 Hz  
GB 0

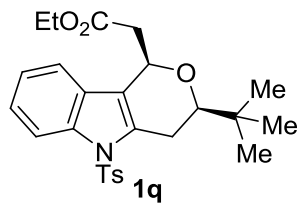

<sup>1</sup>H NMR in CDCl<sub>3</sub>

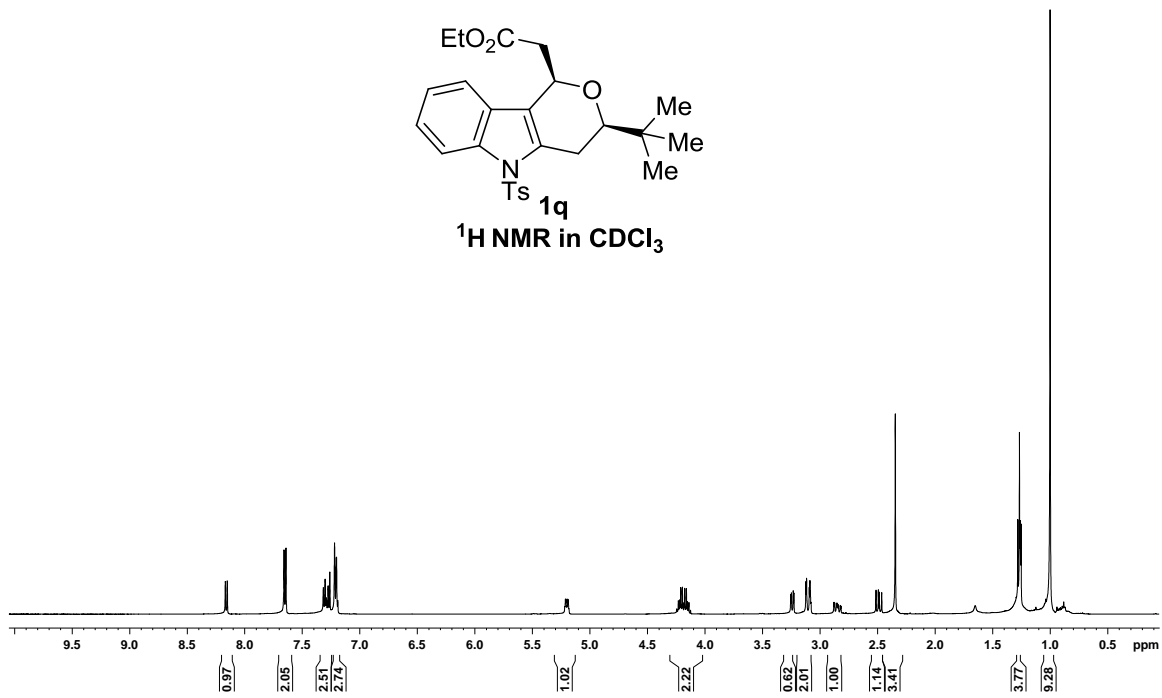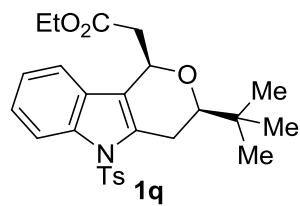

<sup>13</sup>C NMR in CDCl<sub>3</sub>

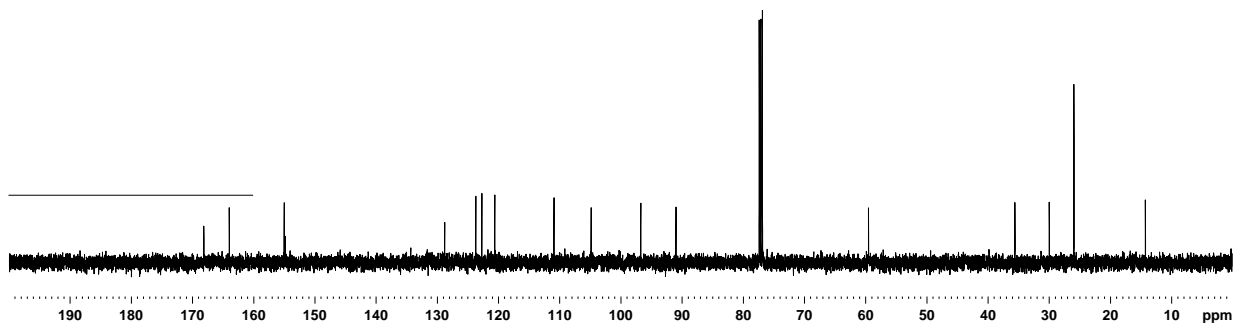



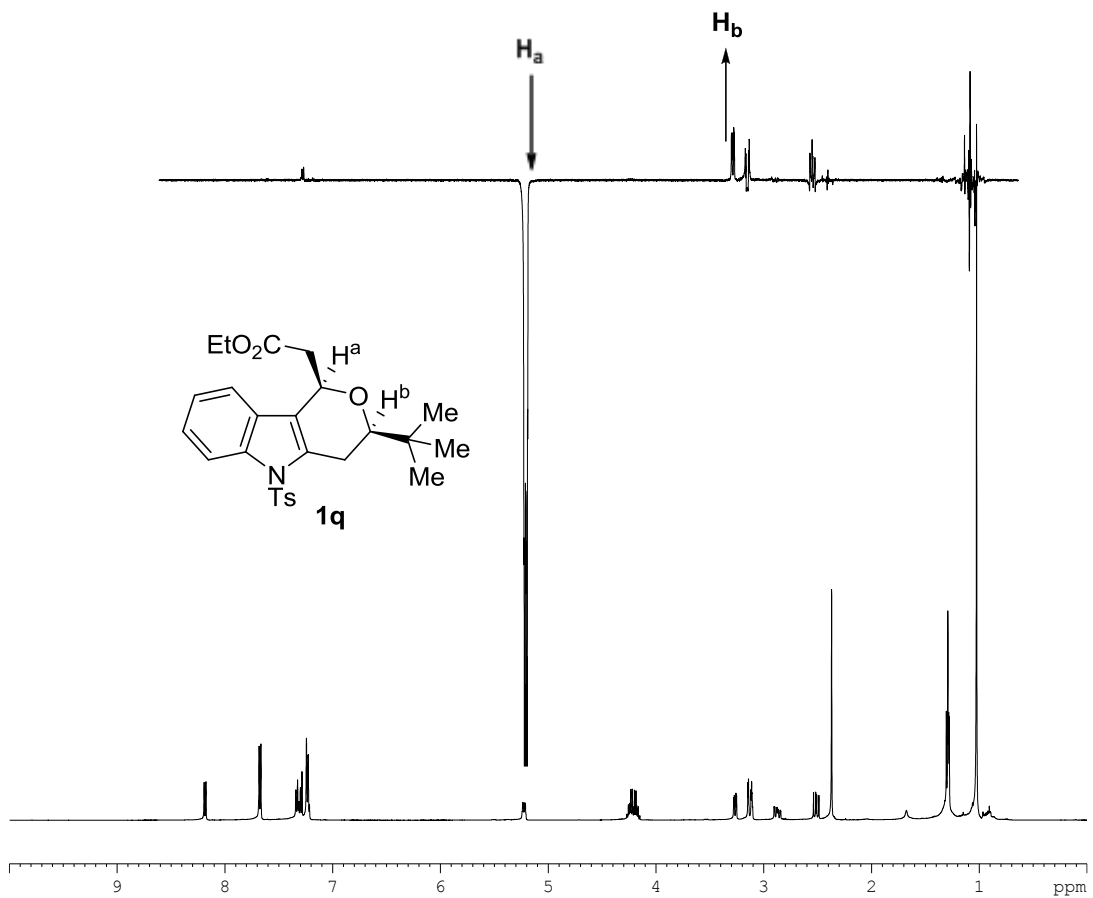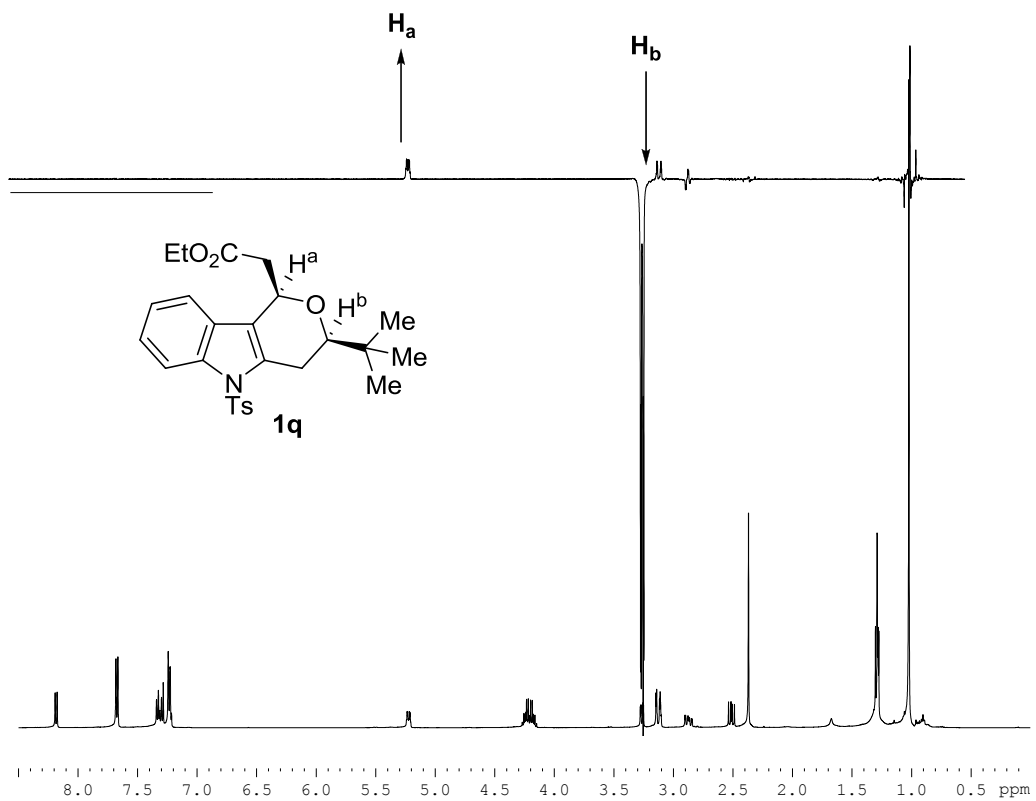

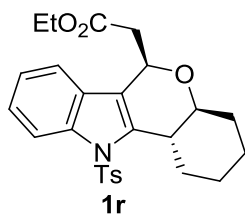

<sup>1</sup>H NMR in CDCl<sub>3</sub>

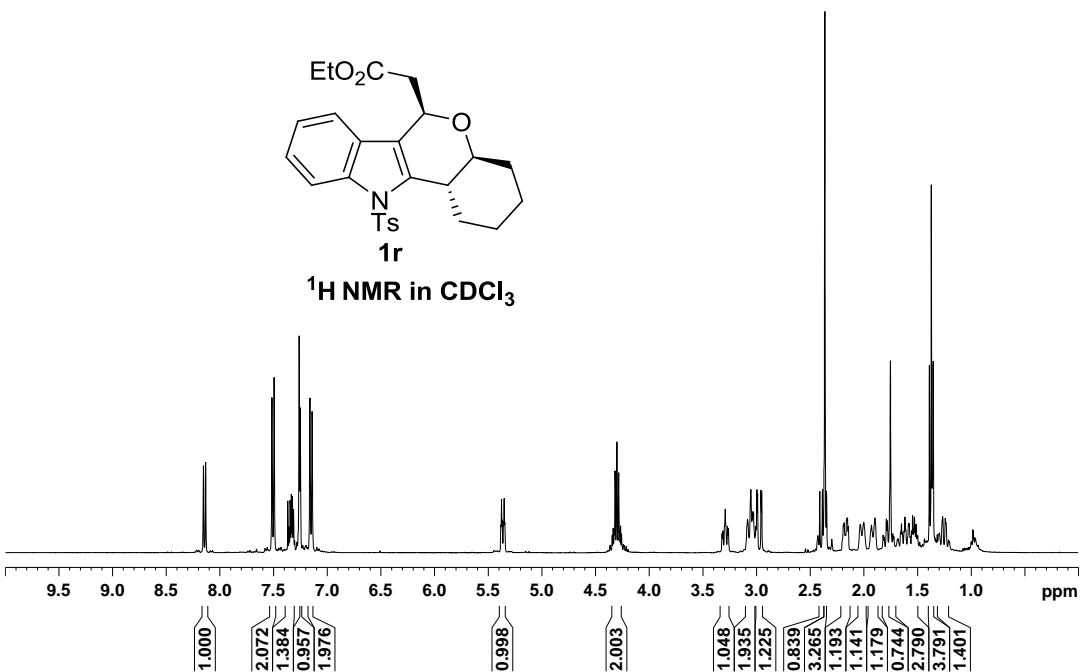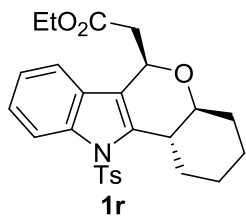

<sup>13</sup>C NMR in CDCl<sub>3</sub>

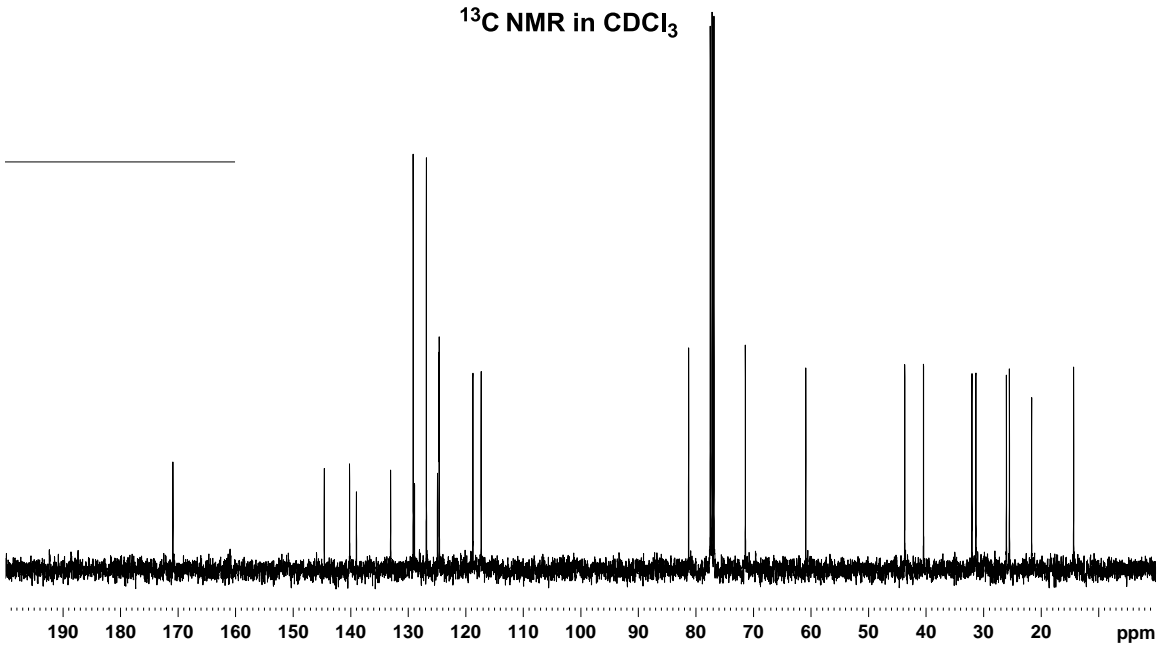

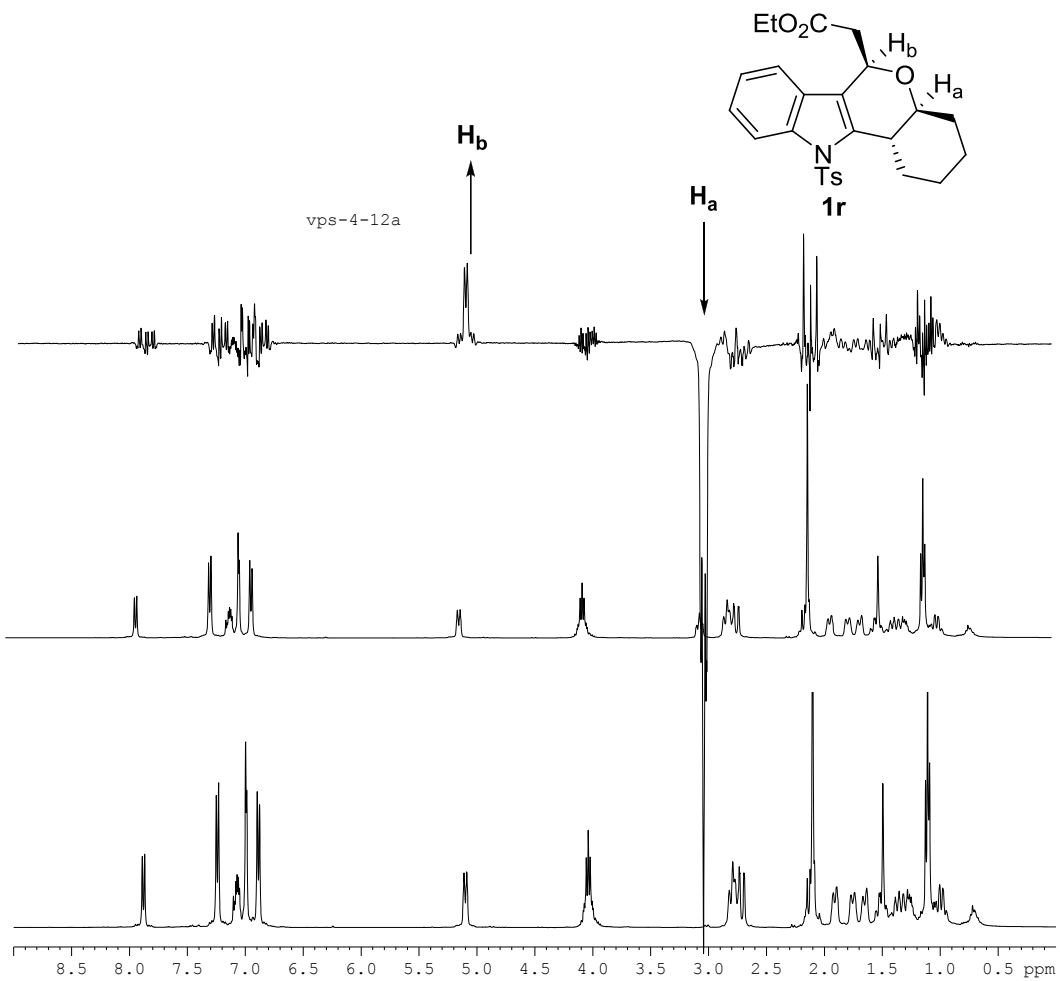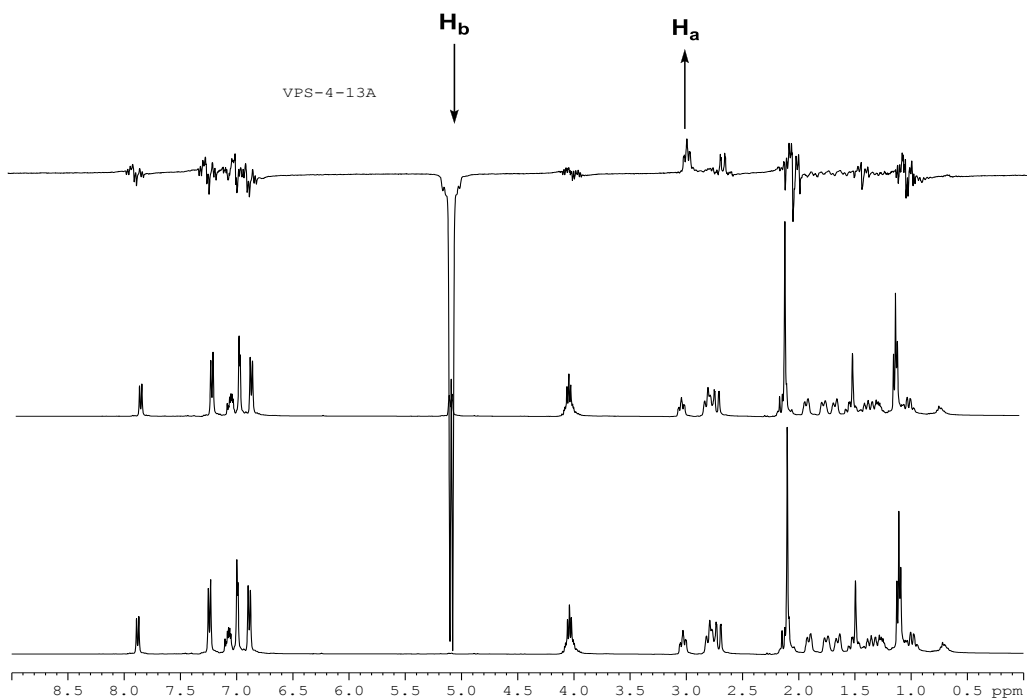

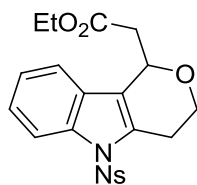

1s

<sup>1</sup>H NMR in CDCl<sub>3</sub>

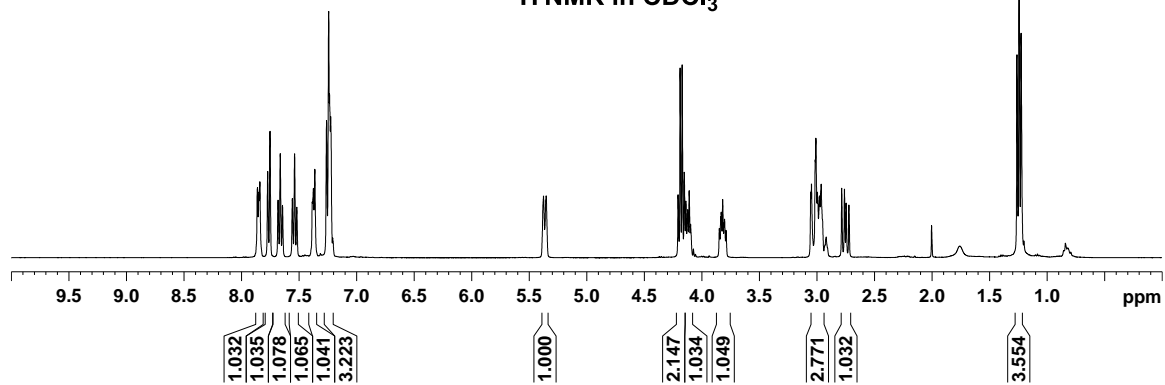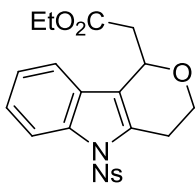

1s

<sup>13</sup>C NMR in CDCl<sub>3</sub>

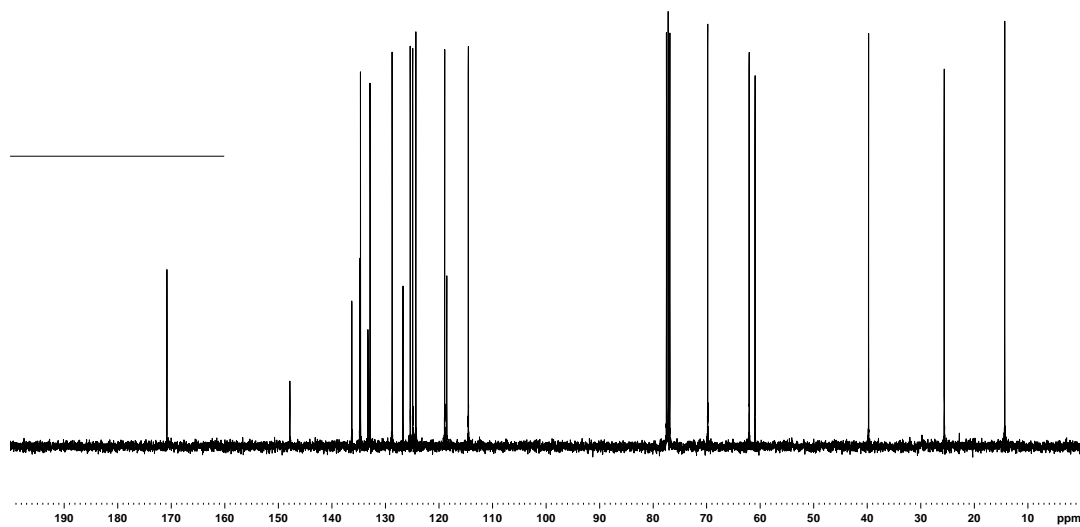

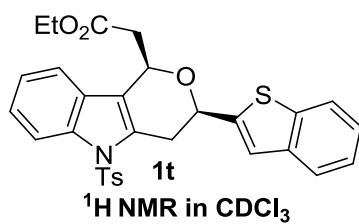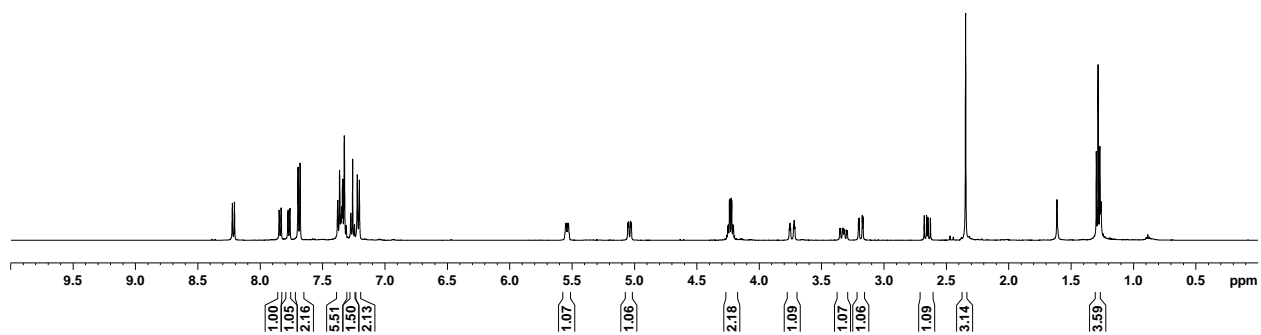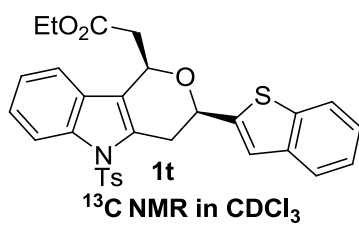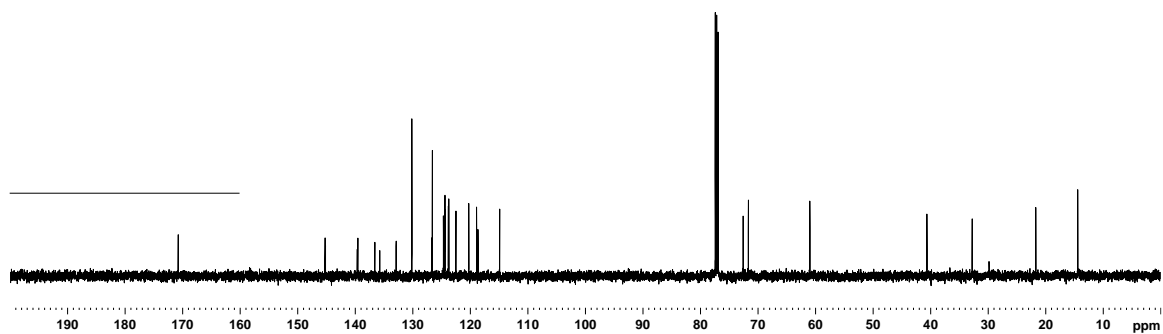

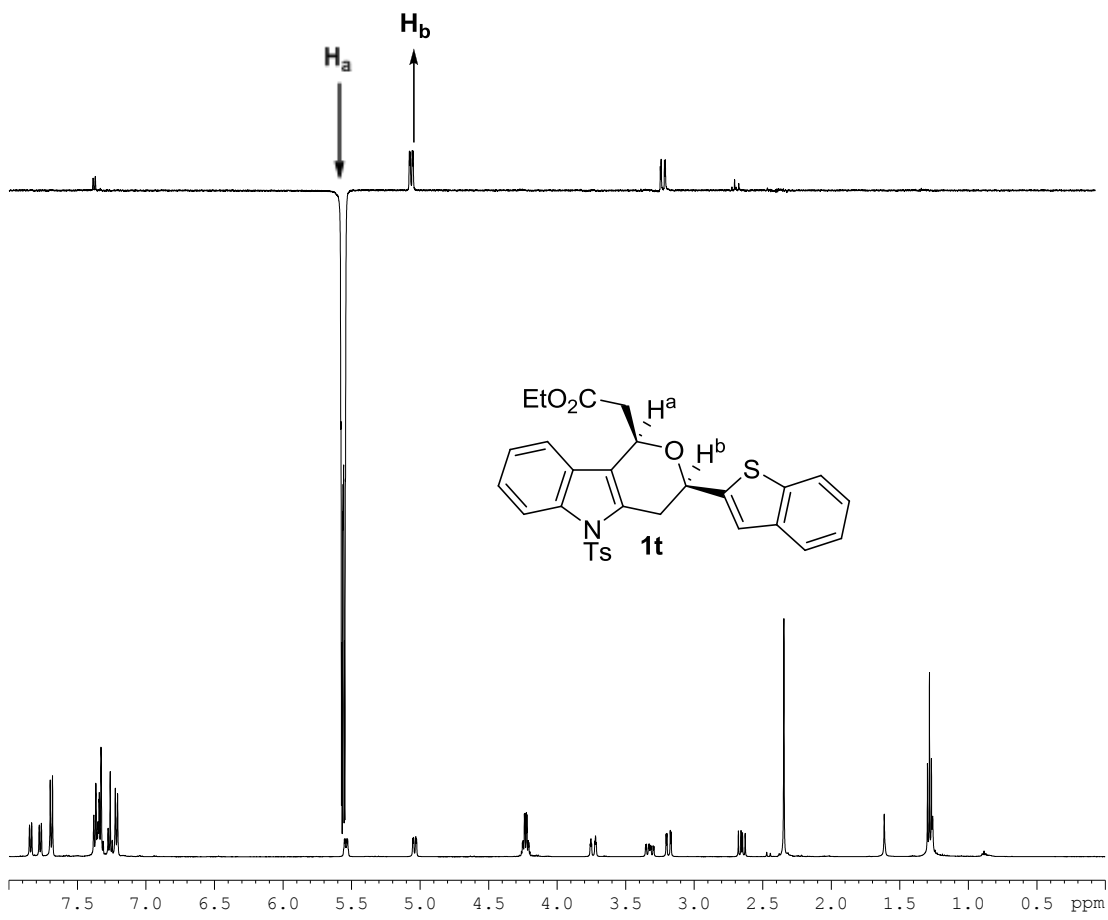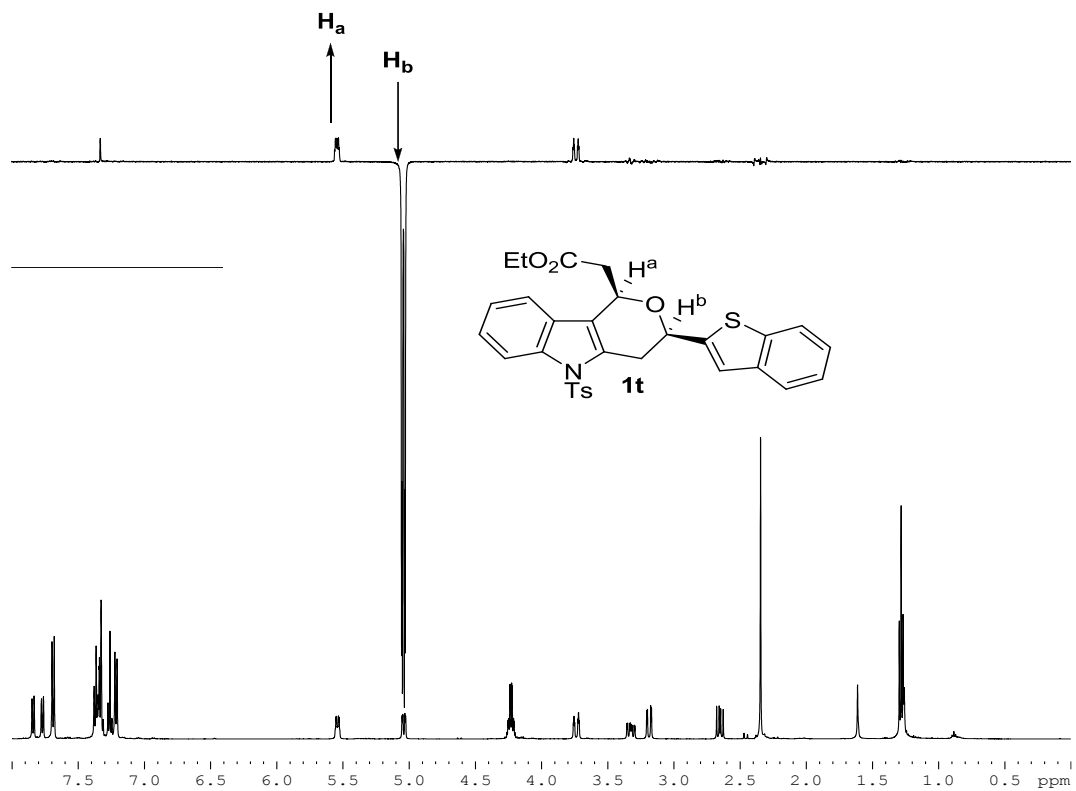

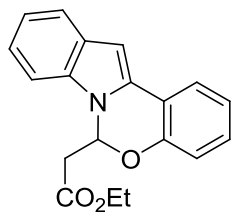

1u

$^1\text{H NMR}$  in  $\text{CDCl}_3$

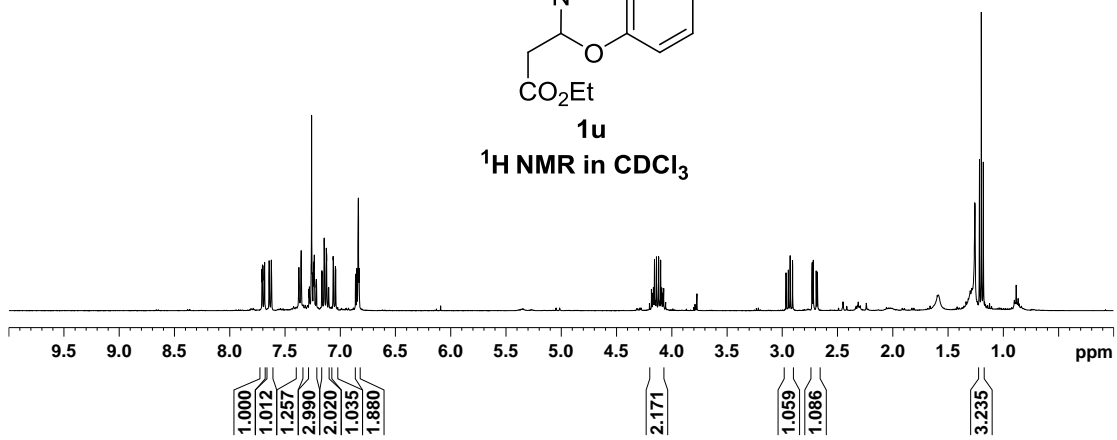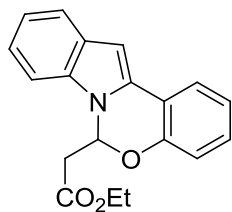

1u

$^{13}\text{C NMR}$  in  $\text{CDCl}_3$

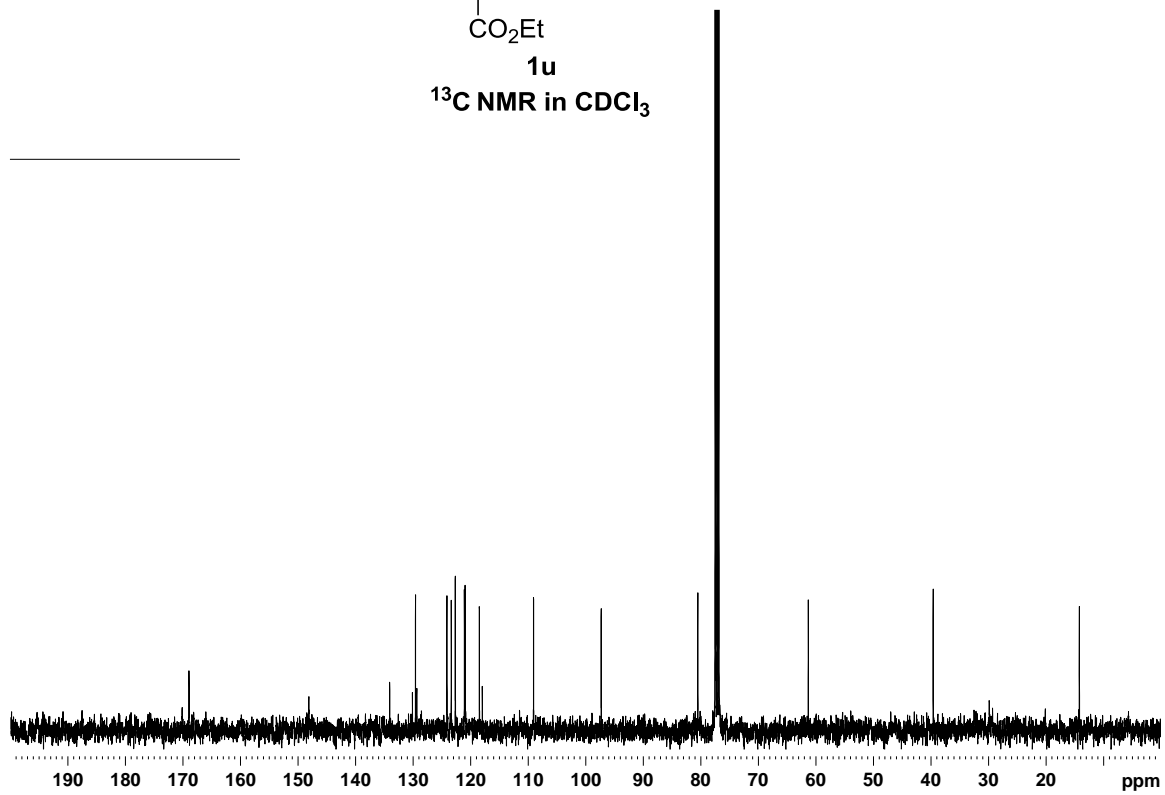

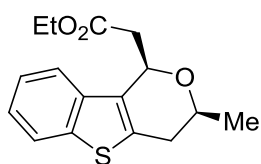

1v

<sup>1</sup>H NMR in CDCl<sub>3</sub>

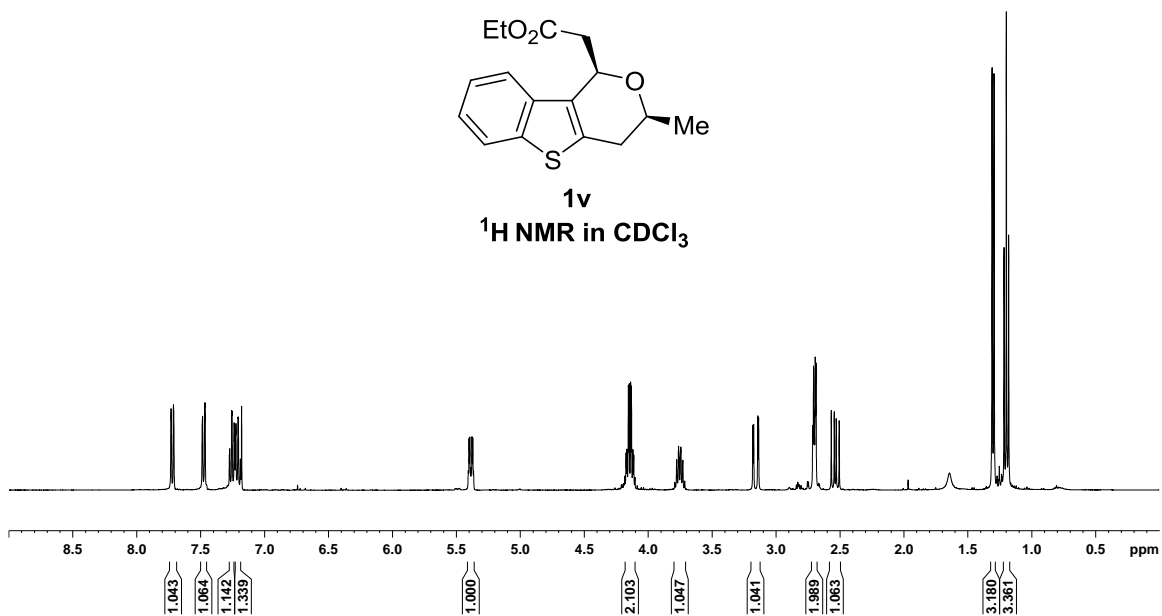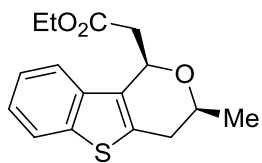

1v

<sup>13</sup>C NMR in CDCl<sub>3</sub>

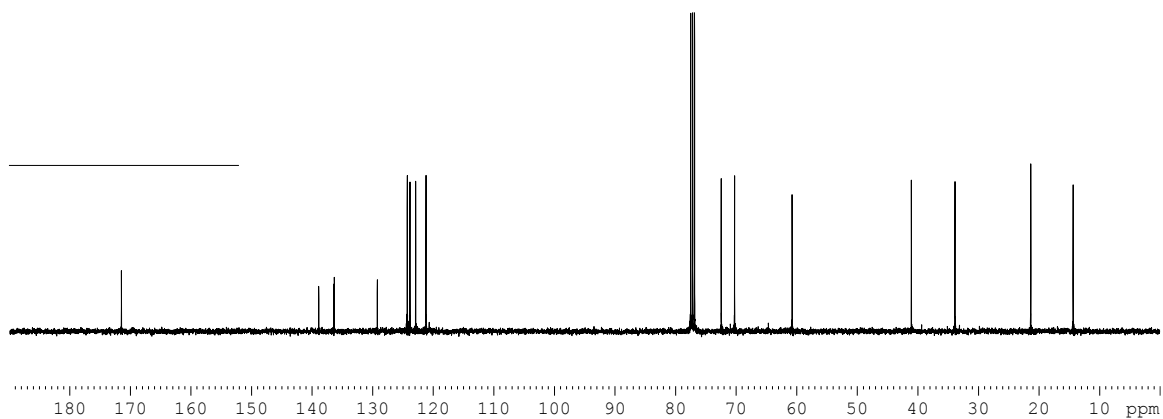



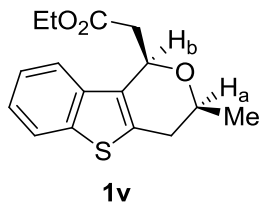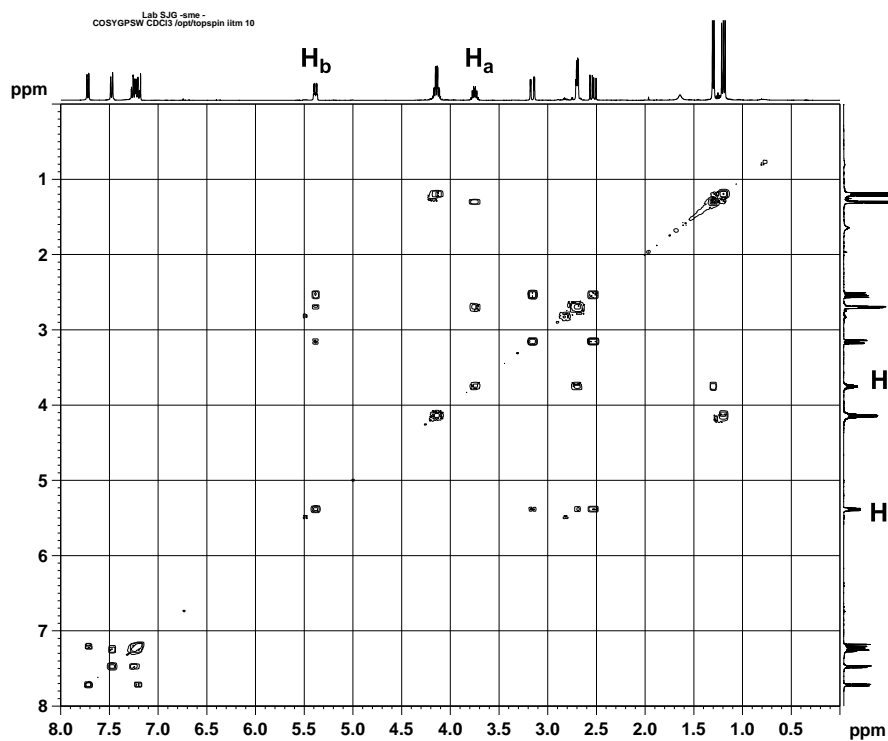

```

Current Data Parameters
NAME      sjg1112
EXPNO    71
PROCNO   1

F2 - Acquisition Parameters
Date_    2012127
Time     18.56
INSTRUM  spect
PROBHD   5 mm PABBO BB/
PULPROG  cosygpsw
TD       2048
SOLVENT  CDC13
NS       1
DS       8
SWH      5494.505 Hz
FIDRES   2.602664 Hz
AQ       0.1864180 sec
RG       27.8
DW       91.000 usec
DE       6.50 usec
TE       298.0 K
D0       0.0000000 sec
D1       1.9668200 sec
D11      0.0000000 sec
D12      0.0000000 sec
D13      0.0000400 sec
D16      0.0002000 sec
IN0      0.00018200 sec

===== CHANNEL f1 =====
NUC1     1H
P0       11.75 usec
P1       11.75 usec
P17      2500.00 usec
PLW1     15.30000019 W
PLW10    3.12479997 W
SFO1     500.1518964 MHz

===== GRADIENT CHANNEL =====
GPNAM1   SMS1Q10.100
GP21     10.00 %
P16      1000.00 usec

F1 - Acquisition parameters
SI       128
SFO1     500.1519 MHz
FIDRES   42.925823 Hz
SW       10.986 ppm
FMODE    QF

F2 - Processing parameters
SI       1024
SF       500.1500536 MHz
WDW      QSINE
SSB      0
LB       0 Hz
GB       0
PC       1.40

F1 - Processing parameters
SI       1024
MC2      QF
SF       500.1500536 MHz
WDW      States-TPPI
SSB      0
LB       0 Hz
GB       0
  
```

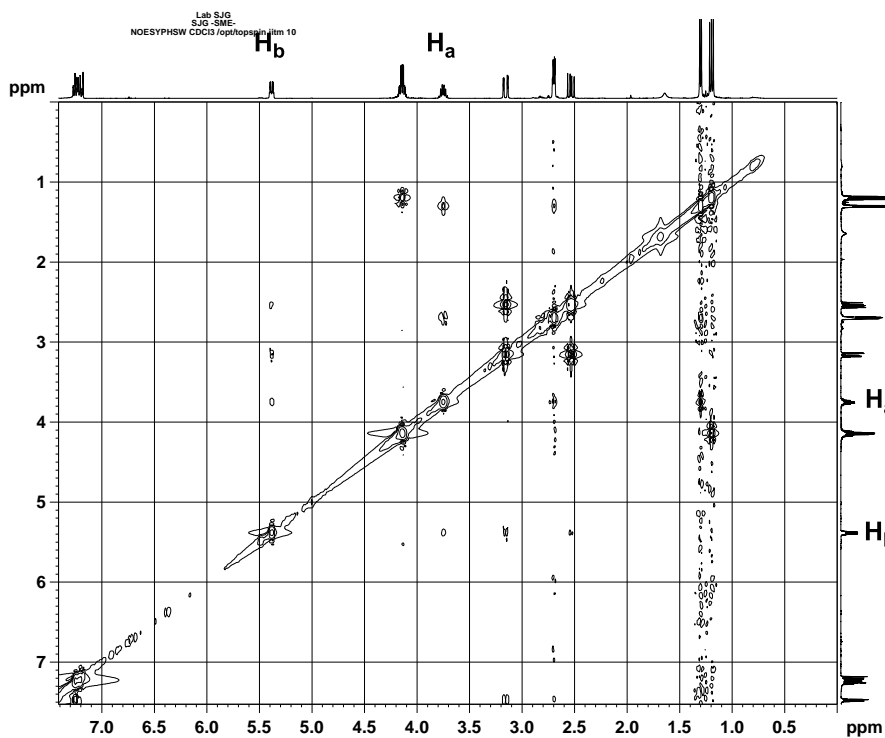

```

Current Data Parameters
NAME      sjg1112
EXPNO    72
PROCNO   1

F2 - Acquisition Parameters
Date_    2012127
Time     20.03
INSTRUM  spect
PROBHD   5 mm PABBO BB/
PULPROG  noesygpsw
TD       2048
SOLVENT  CDC13
NS       4
DS       32
SWH      5494.505 Hz
FIDRES   2.602664 Hz
AQ       0.1864180 sec
RG       27.8
DW       91.000 usec
DE       6.50 usec
TE       298.0 K
D0       0.00007604 sec
D1       2.01433611 sec
D8       0.30000001 sec
D11      0.0000000 sec
D12      0.0002000 sec
D16      0.0002000 sec
IN0      0.00018200 sec

===== CHANNEL f1 =====
NUC1     1H
P1       11.75 usec
P2       23.50 usec
P17      2500.00 usec
PLW1     15.30000019 W
PLW10    3.12479997 W
SFO1     500.1518964 MHz

===== GRADIENT CHANNEL =====
GPNAM1   SMS1Q10.100
GP21     10.00 %
P16      1000.00 usec

F1 - Acquisition parameters
SI       256
SFO1     500.1519 MHz
FIDRES   21.462912 Hz
SW       10.986 ppm
FMODE    States-TPPI

F2 - Processing parameters
SI       1024
SF       500.1500536 MHz
WDW      QSINE
SSB      2
LB       0 Hz
GB       0
PC       1.00

F1 - Processing parameters
SI       1024
MC2      States-TPPI
SF       500.1500536 MHz
WDW      SINE
SSB      2
LB       0 Hz
GB       0
  
```

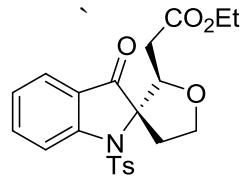

**15**  
 $^1\text{H NMR}$  in  $\text{CDCl}_3$

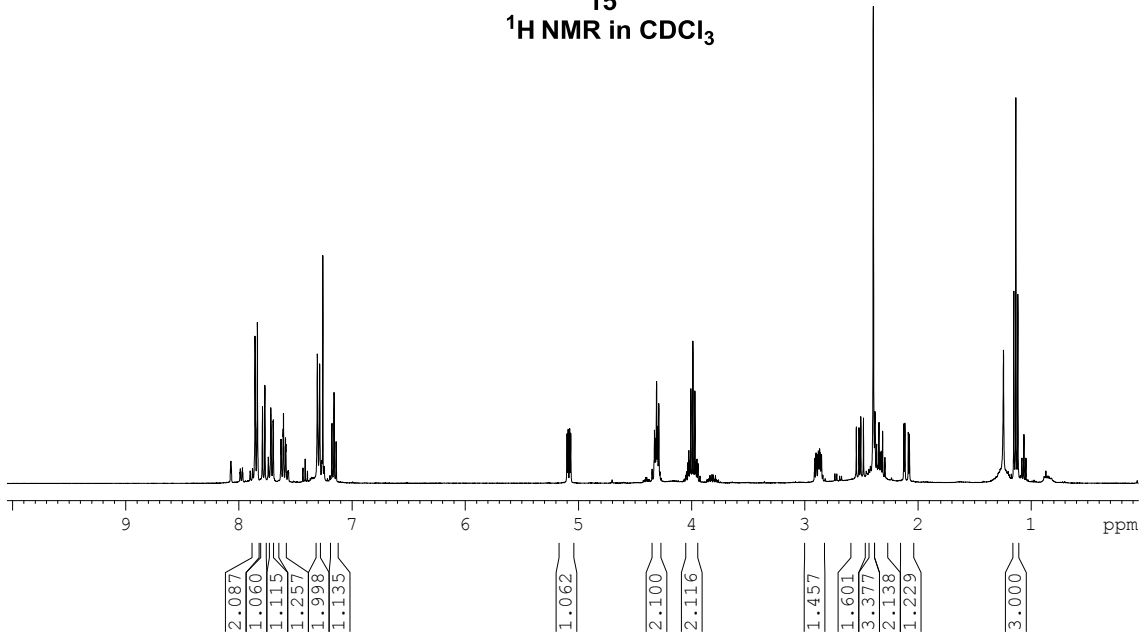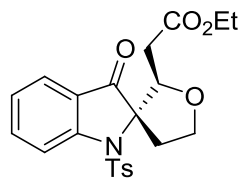

**15**  
 $^{13}\text{C NMR}$  in  $\text{CDCl}_3$

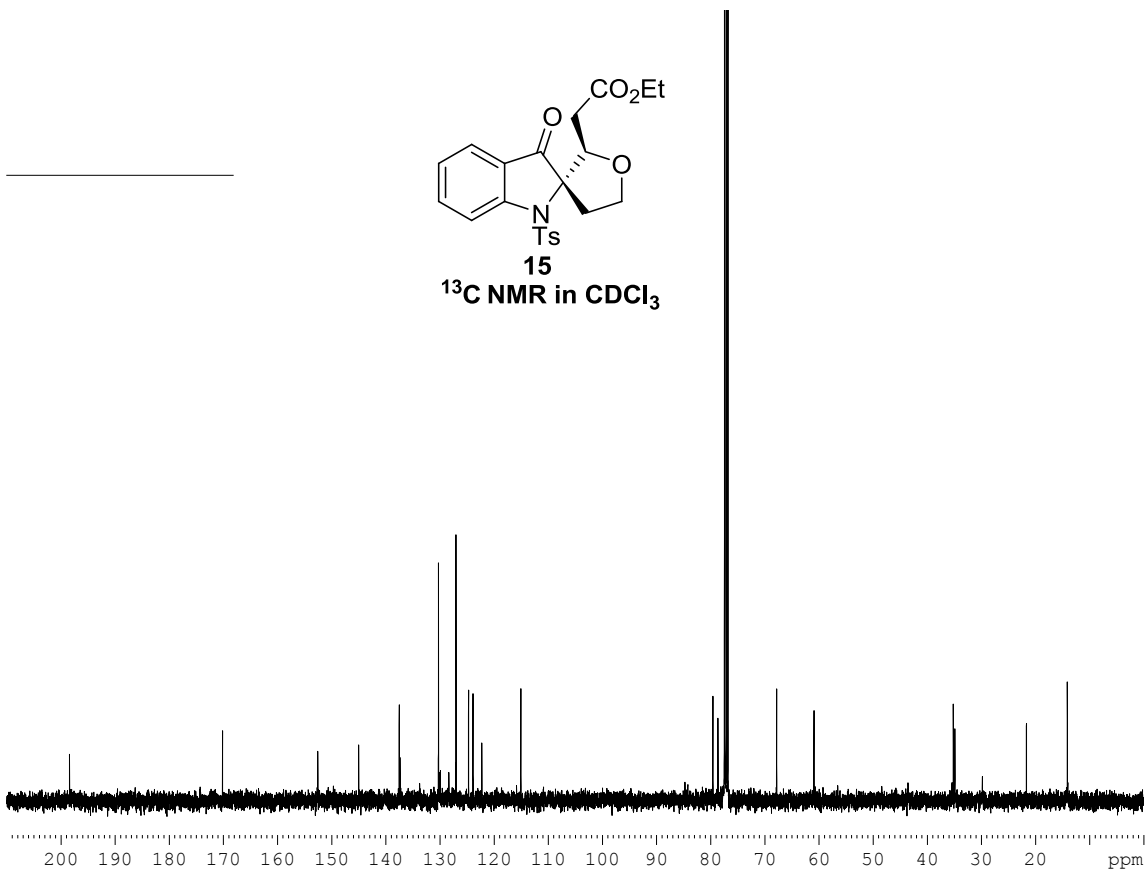

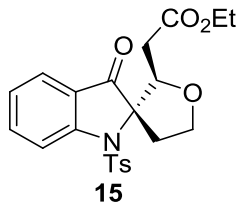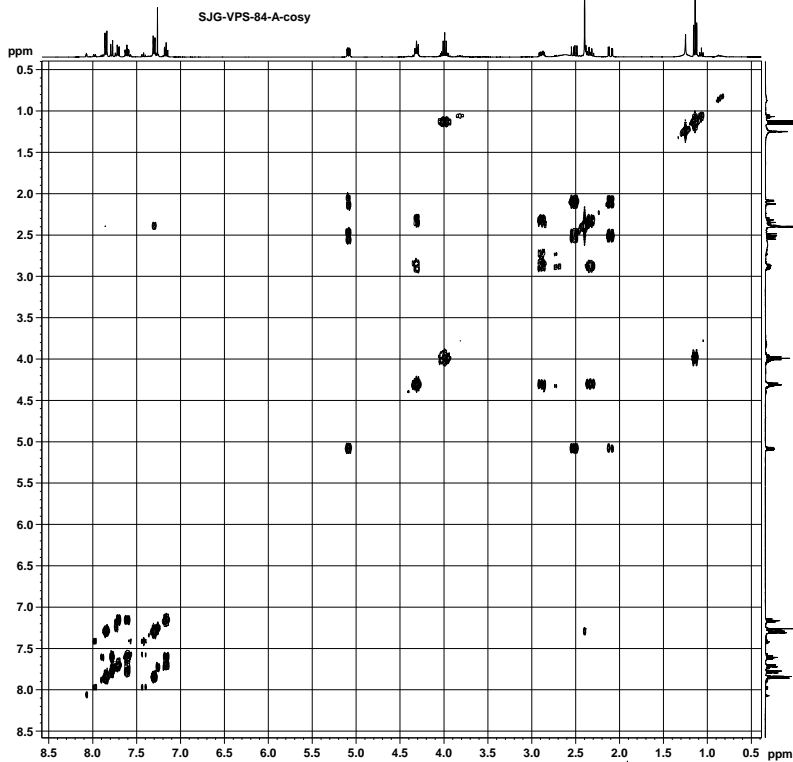

NAME SJG-VPS-84-A-cosy  
 EXPNO 28  
 PROCNO 1  
 Date\_ 20121107  
 Time 15.34  
 INSTRUM spect  
 PROBHD 5 mm PABBO BB-  
 PULPROG cosygpgf  
 TD 2048  
 SOLVENT CDCl3  
 NS 12  
 DS 16  
 SWH 3280.840 Hz  
 FIDRES 1.601973 Hz  
 AQ 0.3121652 sec  
 RG 362  
 DW 152.400 usec  
 DE 6.50 usec  
 TE 294.2 K  
 D0 0.00000300 sec  
 D1 1.00000000 sec  
 D13 0.00000400 sec  
 D16 0.00020000 sec  
 IN0 0.00030480 sec

===== CHANNEL f1 =====  
 NUC1 1H  
 P0 13.50 usec  
 P1 13.50 usec  
 PL1 -1.00 dB  
 PL1W 10.56200695 W  
 SFO1 400.1318023 MHz

===== GRADIENT CHANNEL =====  
 GPNAM1 SINE.100  
 GPZ1 10.00 %  
 P16 1000.00 usec  
 NDO 1  
 TD 124  
 SFO1 400.1318 MHz  
 FIDRES 26.460329 Hz  
 SW 8.200 ppm  
 FrMODE QF  
 SI 2048  
 SF 400.1300098 MHz  
 WDW SINE  
 SSB 0  
 LB 0.00 Hz  
 GB 0  
 PC 1.40  
 SI 512  
 MC2 QF  
 SF 400.1300098 MHz  
 WDW SINE  
 SSB 0  
 LB 0.00 Hz  
 GB 0

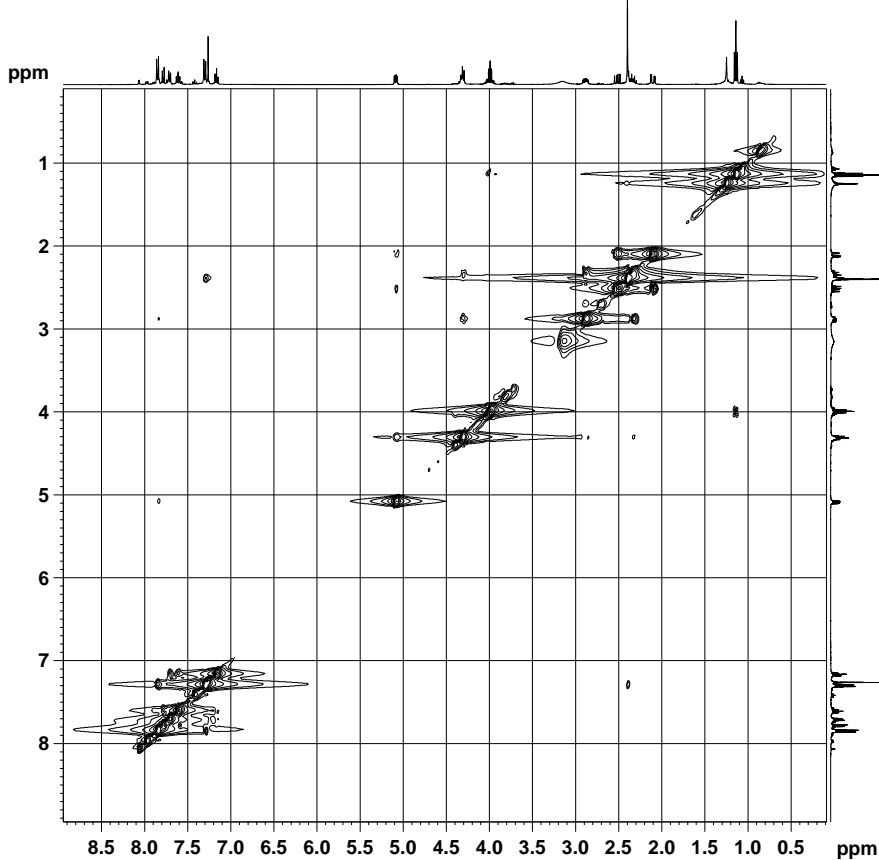

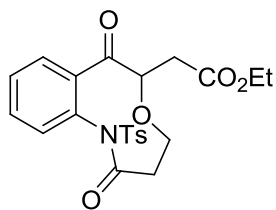

**14**

**<sup>1</sup>H NMR in CDCl<sub>3</sub>**

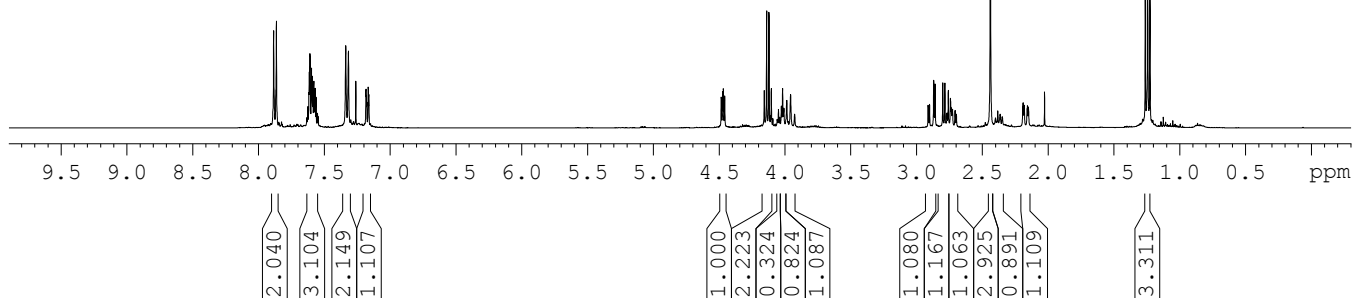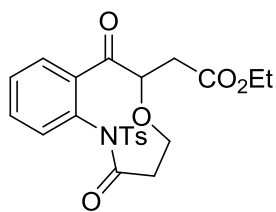

**14**

**<sup>13</sup>C NMR in CDCl<sub>3</sub>**

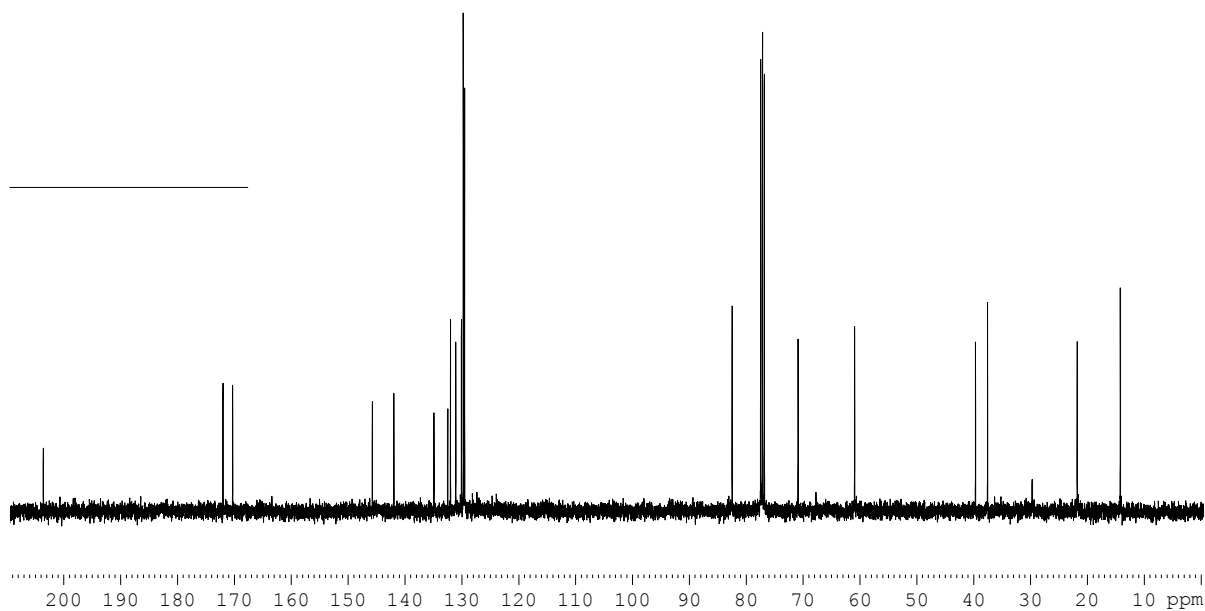

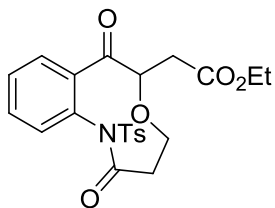

14

<sup>13</sup>C NMR in CDCl<sub>3</sub>

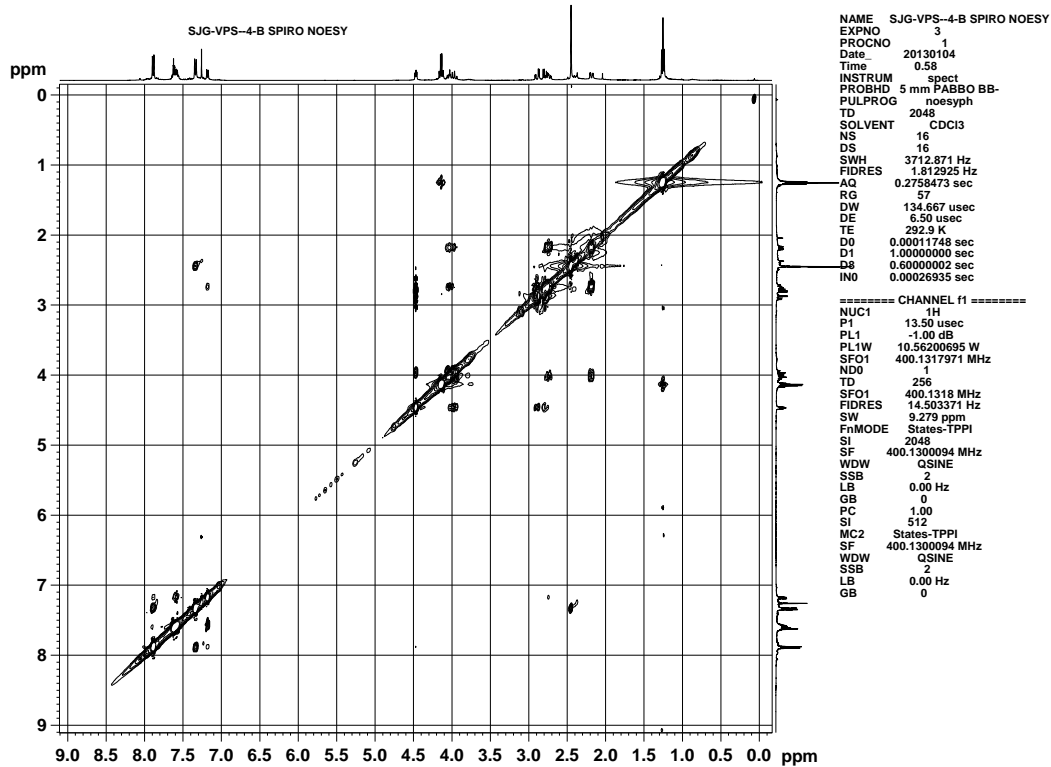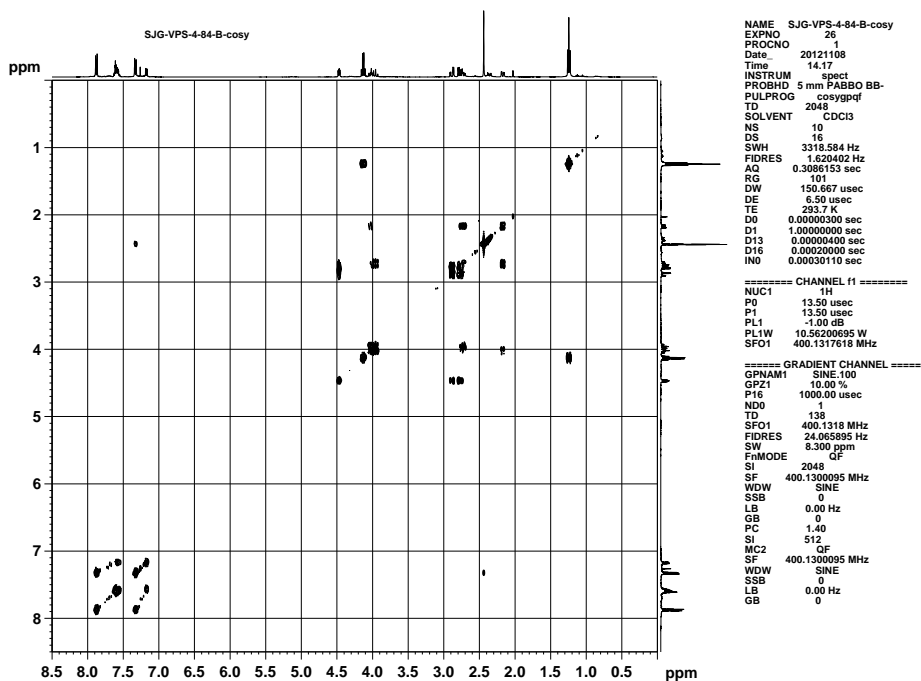

Supplement: c4ob01387e1.pdf [file c4ob01387e1.pdf]
